# Supplementary material for: Bifunctionality of Zn dust in Ullmann C–C cross-coupling by Ni/Pd dual catalysis: theoretical insight
Source: Royal Society of Chemistry journal article supplement (doi:10.1039/d3cy00683b), 2023-01-01
Supplement: d3cy00683b1.pdf [file d3cy00683b1.pdf]

## Electronic Supplementary Information

# Bifunctionality of Zn dust in Ullmann C–C cross-coupling by Ni/Pd dual catalysis: Theoretical insight

Rong-Wan Gao,<sup>a</sup> Yu-Jiao Dong,<sup>a</sup> Bo Zhu\*<sup>a</sup> and Wei Guan\*<sup>a</sup>

<sup>a</sup>Institute of Functional Material Chemistry, Faculty of Chemistry, Northeast Normal University,  
Renmin Street No. 5268, Changchun 130024 (China)

E-mail: zhub255@nenu.edu.cn; guanw580@nenu.edu.cn

## Table of Contents

|                                                                                                      |     |
|------------------------------------------------------------------------------------------------------|-----|
| 1. Computational methods.....                                                                        | S1  |
| 1.1 Heterogeneous calculations.....                                                                  | S1  |
| 1.2 Homogeneous calculations.....                                                                    | S1  |
| 1.3 Correction of translational entropy in solution.....                                             | S2  |
| 2. Single-electron reduction.....                                                                    | S3  |
| 3. Selective oxidative additions.....                                                                | S5  |
| 3.1 Gibbs energy profiles for oxidative additions by Ni <sup>I</sup> and Pd <sup>0</sup> .....       | S5  |
| 3.2 Gibbs energy profiles for oxidative additions by Ni <sup>0</sup> .....                           | S6  |
| 3.3 Selected bond dissociation energies analysis.....                                                | S6  |
| 4. The transmetalation between Ni <sup>III</sup> and Pd <sup>II</sup> complexes.....                 | S7  |
| 5. The relative stability of Zn <sup>II</sup> &LiCl/Zn(101) and ZnCl <sub>2</sub> ·LiCl/Zn(101)..... | S9  |
| 6. The oxidative addition of substrate to Zn.....                                                    | S9  |
| 7. The energy barrier of transmetalation involving other additives.....                              | S10 |
| 8. Coordinates of all geometry optimized structures.....                                             | S11 |
| 9. References .....                                                                                  | S82 |

## 1. Computational methods

### 1.1 Heterogeneous calculations

The active species of Ni and Pd catalysts produced via the reduction by zinc powder was calculated by the Vienna Ab initio Simulation Package (VASP) program with the Perdew-Burke-Ernzerhof (PBE) functional.<sup>S1</sup> For zinc powder, we used 90 zinc atoms in  $16.8 \times 13.3 \times 19.5$  Å cells as the model. The lowest-layer zinc atoms are frozen in the three-layer zinc atom model. Taking into account of the large number of atoms in the system, the convergence threshold of geometric optimization and electronic structure iteration was set to  $0.1 \text{ eV/Å}$  and  $10^{-4} \text{ eV}$ , and the spin polarization was considered. The cut-off energy was 400 eV, and the k-point was set to  $3 \times 3 \times 1$  to ensure the result was more reliable.

### 1.2 Homogeneous calculations

All the structures involved in the homogeneous reaction were optimized by (U)M06<sup>S2</sup> method in the gas phase employed Gaussian 09 program. The LANL2DZ basis sets were used for valence electrons of Ni, Pd and Zn atoms with corresponding effective core potentials (ECPs) representing their core electrons and 6-31G(d, p) basis set is used for other atoms. Moreover, intrinsic reaction coordinates (IRC) and vibration frequency calculations were performed at the same level as geometric optimization. The IRC was performed to confirm that the transition state could connect the correct reactants and products.<sup>S3</sup> In addition, the translational entropy was corrected using the method developed by Whitesides et al.<sup>S4</sup> The single point calculation was performed at the SMD (1:1 NMP/DMF)/(U)M06/[6-311++G(d,p)/SDD(Ni, Pd, Zn)] level, considering the solvent effect using the SMD solvation model.<sup>S5,S6</sup> The combination of low-cost optimization in gas phase with high-cost single-point calculation in solution has been proved to be reasonable for evaluating the mechanism of organic reactions. The 3D visualization structures were generated by CYLview and VMD program.<sup>S7</sup>

Additionally, different methods were used to test the initial catalyst (bpy)Ni<sup>II</sup>Cl<sub>2</sub> under the double-zeta basis sets and the triple-zeta basis sets, as shown in Table S1, the double-zeta basis sets and gas-phase optimization have little effect on the geometric structures, so the final gas-phase optimization was performed with the double-zeta basis sets and the M06 functional. Then the energy was refined by the single point calculation using the triple-zeta basis sets under solvation condition.

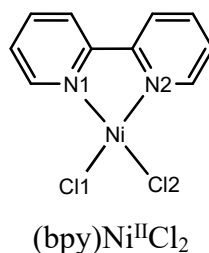

**Table S1.** Comparison of the DFT-optimized geometry of (bpy)Ni<sup>II</sup>Cl<sub>2</sub>.

|                       | d (Ni-Cl1) | d (Ni-Cl2) | d (Ni-N1) | d (Ni-N2) | ∠(N1-Ni-N2) | ∠(Cl1-Ni-Cl2) |
|-----------------------|------------|------------|-----------|-----------|-------------|---------------|
| M06 <sup>a</sup>      | 2.170      | 2.171      | 1.948     | 1.948     | 82.7        | 89.8          |
| M06 <sup>b</sup>      | 2.195      | 2.195      | 1.939     | 1.939     | 83.1        | 89.2          |
| B3LYP <sup>c</sup>    | 2.231      | 2.232      | 1.955     | 1.955     | 82.7        | 89.3          |
| B3LYP-D3 <sup>d</sup> | 2.233      | 2.234      | 1.956     | 1.956     | 82.6        | 89.3          |
| B97XD <sup>e</sup>    | 2.215      | 2.215      | 1.950     | 1.950     | 82.6        | 89.5          |

<sup>a</sup> (U)M06/[6-31G(d,p)/Lanl2DZ(Ni,Pd,Zn)].

<sup>b</sup> SMD(1:1 NMP/DMF)/(U)M06/[6-311G(d)/SDD(Ni,Pd,Zn)].

<sup>c</sup> (U)B3LYP/[6-31G(d,p)/Lanl2DZ(Ni,Pd,Zn)].

<sup>d</sup> (U)B3LYP-D3/[6-31G(d,p)/Lanl2DZ(Ni,Pd,Zn)].

<sup>e</sup> (U) B97XD/[6-31G(d,p)/Lanl2DZ(Ni,Pd,Zn)].

### 1.3 Correction of translational entropy in solution

We evaluated the electronic energy ( $E_{sol}$ ) with zero-point energy correction in solution. For each species, the  $E_{sol}$  is defined through equation (S1):

$$E_{sol} = E_{sol}^{pot} + E_{gas}^{v_0} \quad (S1)$$

the  $E_{sol}^{pot}$  is the potential energy including non-electrostatic energy in solution and  $E_{gas}^{v_0}$  delegates the zero-point vibrational energy in the gas phase. In a bimolecular process, such as the coordination of Ni(II) center to the alkyne, the entropy change which can decrease considerably must be taken into consideration. In such case, Gibbs energy ( $G_{sol}^o$ ) need be computed as follows:

$$\begin{aligned} G_{sol}^o &= H_0 - T(S_r^o + S_v^o + S_t^o) \\ &= E^T + P\Delta V - T(S_r^o + S_v^o + S_t^o) \end{aligned}$$

$$= E_{sol} + E_{therm} - T(S_r^o + S_v^o + S_t^o) \quad (S2)$$

where  $\Delta V$  is 0 in solution,  $E_{therm}$  is the thermal correction by translational, vibrational, and rotational movements, and  $S_r^o$ ,  $S_v^o$ , and  $S_t^o$  are rotational, vibrational, and translational entropies, respectively. In general, the Sackur-Tetrode equation is used to evaluate translational entropy  $S_t^o$ . In solution, however, the usual Sackur-Tetrode equation cannot be directly applied to the evaluation of  $S_t^o$ , because the translation movement is suppressed very much in solution. In this context, the translational entropy was corrected with the method developed by Whitesides et al.,<sup>S4</sup> where the rotational entropy was evaluated in a normal manner. Thermal correction and entropy contributions of vibration movements to the Gibbs energy were evaluated with the frequencies calculated at 353.15 K and 1 atm.

## 2. Single-electron reduction

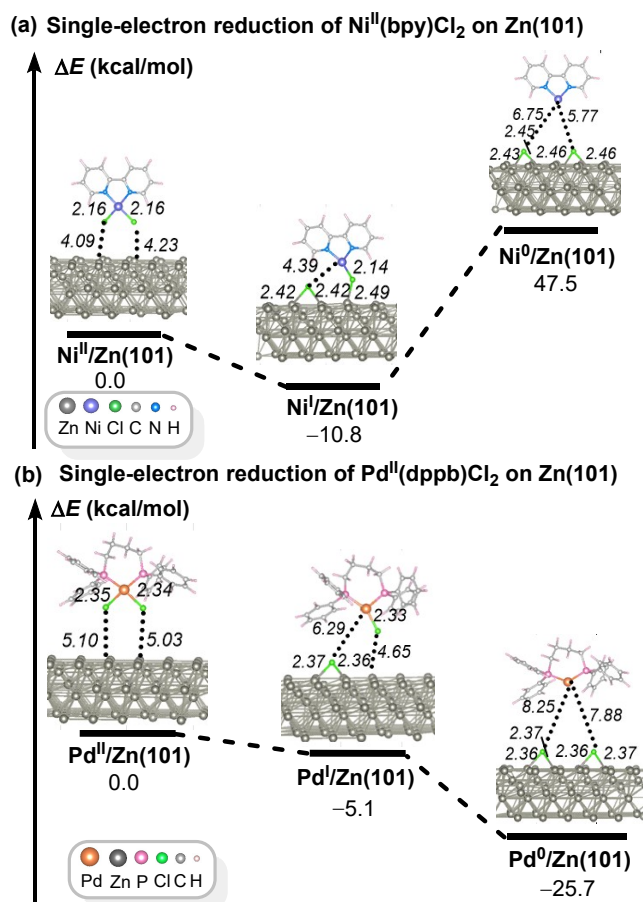

**Fig. S1.** Single-electron reduction process of Ni<sup>II</sup>(bpy)Cl<sub>2</sub> on Zn(101) (a) and single-

electron reduction process of Pd<sup>II</sup>(dppb)Cl<sub>2</sub> on Zn(101) (b). The bond distances are given in angstroms (Å).

As shown in Fig. S1, when Ni<sup>II</sup> interacts with Zn(101) surface, nickel complexes with three oxidation states were located, namely Ni<sup>II</sup>(bpy)Cl<sub>2</sub> (Ni<sup>II</sup>), Ni<sup>I</sup>(bpy)Cl (Ni<sup>I</sup>) and Ni<sup>0</sup>(bpy) (Ni<sup>0</sup>). By comparison, Ni<sup>I</sup>/Zn(101) is the most stable, whereas Ni<sup>0</sup>/Zn(101) is the most unstable. It can be suggested from the non-monotonicity of energy changes that a double-electron reduction of Ni<sup>II</sup> on the Zn(101) surface is inaccessible. Ni<sup>II</sup> is more favorably reduced to Ni<sup>I</sup> rather than Ni<sup>0</sup> in the presence of zinc powder. In contrast, as shown in Fig. S1(b), the energy change of continuous single-electron reduction of Pd<sup>II</sup> on the Zn(101) surface decreases monotonously. Unlike the single-electron reduction of Ni<sup>II</sup> → Ni<sup>I</sup>, Pd<sup>II</sup> is more inclined to complete the double-electron reduction to form Pd(dppb) (Pd<sup>0</sup>) on the Zn(101) surface. Therefore, it can be concluded that Ni<sup>I</sup> and Pd<sup>0</sup> would be the active species to participate the following reaction.

### 3. Selective oxidative additions

#### 3.1 Gibbs energy profiles for oxidative additions by Ni<sup>I</sup> and Pd<sup>0</sup>.

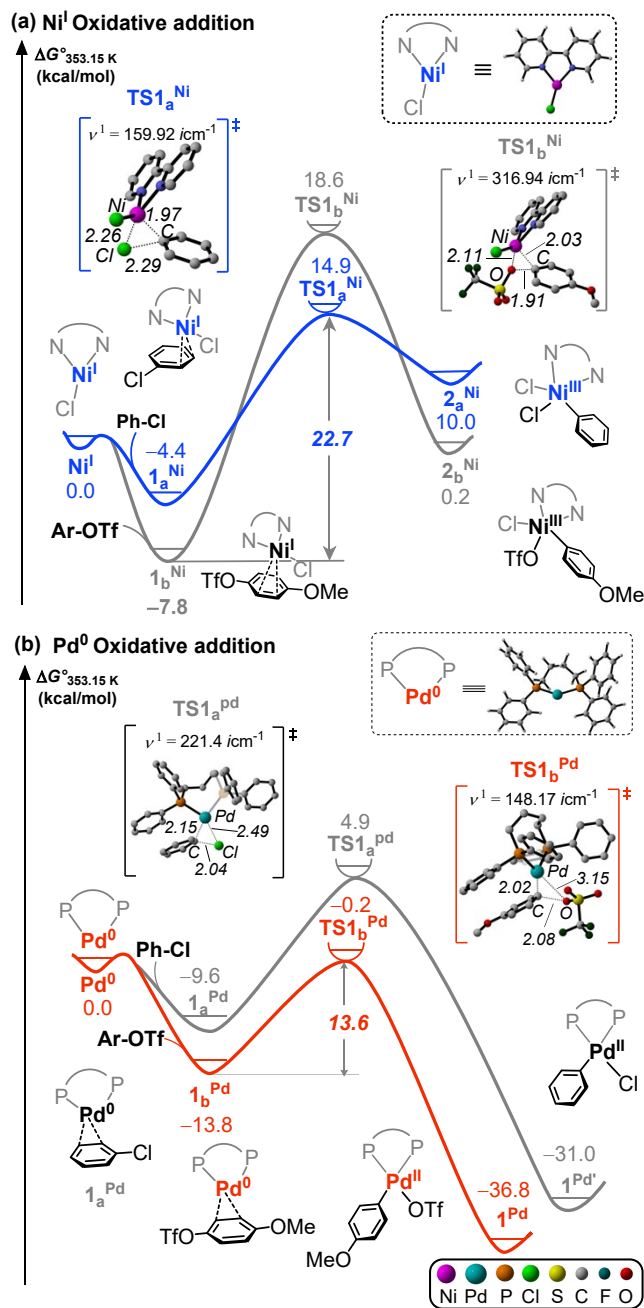

**Fig. S2.** Gibbs energy profiles (ΔG°, in kcal/mol) of oxidative additions of chlorobenzene and 4-methoxyphenyltriflate by Ni<sup>I</sup>(bpy)Cl (a) and Pd<sup>0</sup>(dppb) (b). The bond distances are given in angstroms (Å).

### 3.2 Gibbs energy profiles for oxidative additions by Ni<sup>0</sup>(bpy).

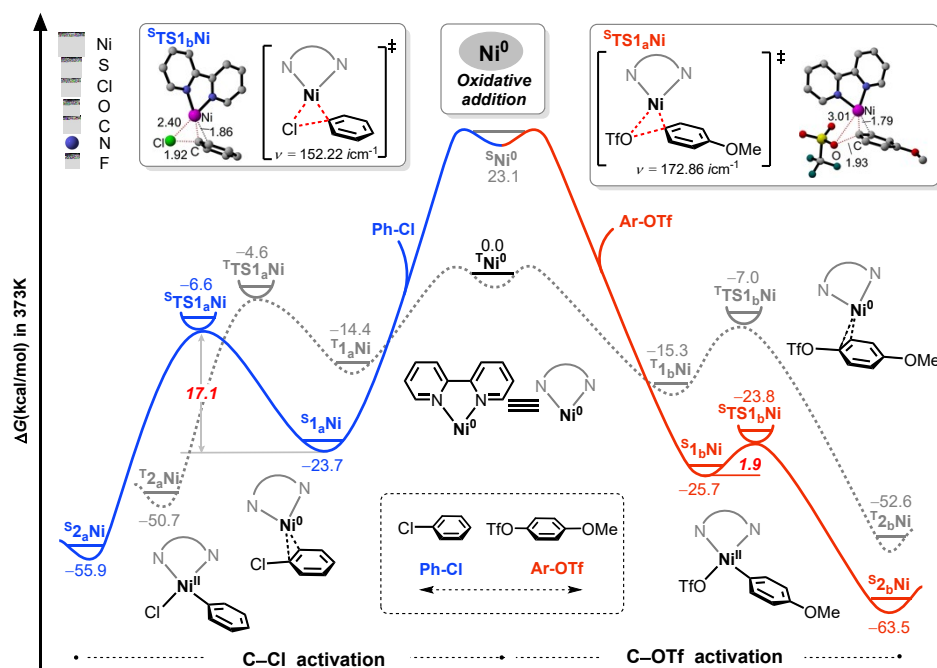

**Fig. S3.** Gibbs energy profiles ( $\Delta G^\circ$ , in kcal/mol) for oxidative additions of chlorobenzene and 4-methoxyphenyltriflate catalyzed by Ni<sup>0</sup>(bpy).

### 3.3 Selected bond dissociation energies analysis

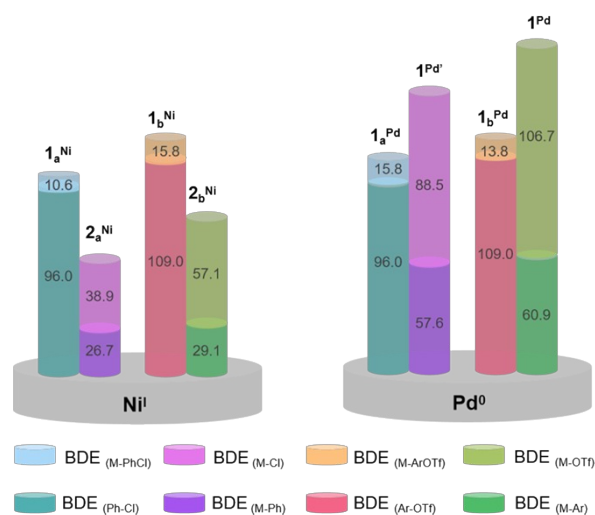

**Fig. S4.** Selected bond dissociation energies (in kcal/mol) of reaction intermediates involved in the oxidative additions of Ph-Cl and Ar-OTf to Ni<sup>I</sup> and Pd<sup>0</sup>.

The relevant bond dissociation energies (BDEs) were evaluated based on the reaction intermediates involved in the oxidative additions, as shown in Fig. S4. In the Ni<sup>I</sup> case, BDE<sub>(Ph-Cl)</sub> and BDE<sub>(Ar-OTf)</sub> are much larger than the sum of BDE<sub>(Ni-Ph)</sub> and BDE<sub>(Ni-Cl)</sub> and

the sum of  $BDE_{(Ni-Ar)}$  and  $BDE_{(Ni-OTf)}$ , respectively. Considering that the newly formed bonds are far less strong than the original bonds in the oxidative additions, so the weaker C–Cl bond of Ph–Cl is easier to be activated by  $Ni^I$  than the C–OTf bond activation of Ar–OTf. In the  $Pd^0$  case, on the contrary,  $BDE_{(Ph-Cl)}$  and  $BDE_{(Ar-OTf)}$  are much smaller than the sum of  $BDE_{(Pd-Ph)}$  and  $BDE_{(Pd-Cl)}$  and the sum of  $BDE_{(Pd-Ar)}$  and  $BDE_{(Pd-OTf)}$ , respectively. Moreover, the Pd–OTf bond is stronger than the Pd–Cl bond, inducing the C–OTf bond of Ar–OTf is easier to be activated than C–Cl bond of Ph–Cl by  $Pd^0$ . In other words, the origin of such orthogonal reactivity results from the difference that the Ni–Cl and Ni–OTf bonds are too weak to reverse the selectivity determined by C–Cl bond of Ph–Cl and C–OTf bond of Ar–OTf, but the quite strong Pd–OTf bond can reverse it.

#### 4. The transmetalation between $Ni^{III}$ and $Pd^{II}$ complexes

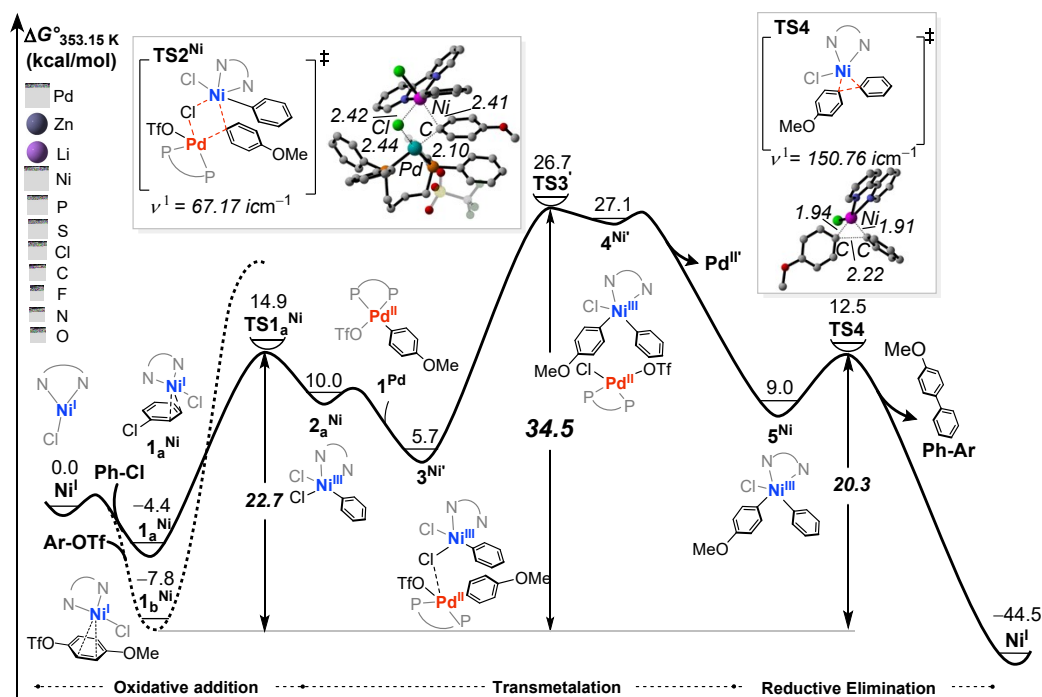

**Fig. S5** Gibbs energy profiles ( $\Delta G^\circ$ , in kcal/mol) for the transmetalation.

It is that aryl migrates from the  $Pd^{II}$  center to the  $Ni^{III}$  center in  $3^{Ni}$ , while the Cl group from  $Ni^{III}$  complex migrates to the  $Pd^{II}$  center simultaneously, and then the reductive elimination occurs from  $Ni^{III}$  center in  $5^{Ni}$ .



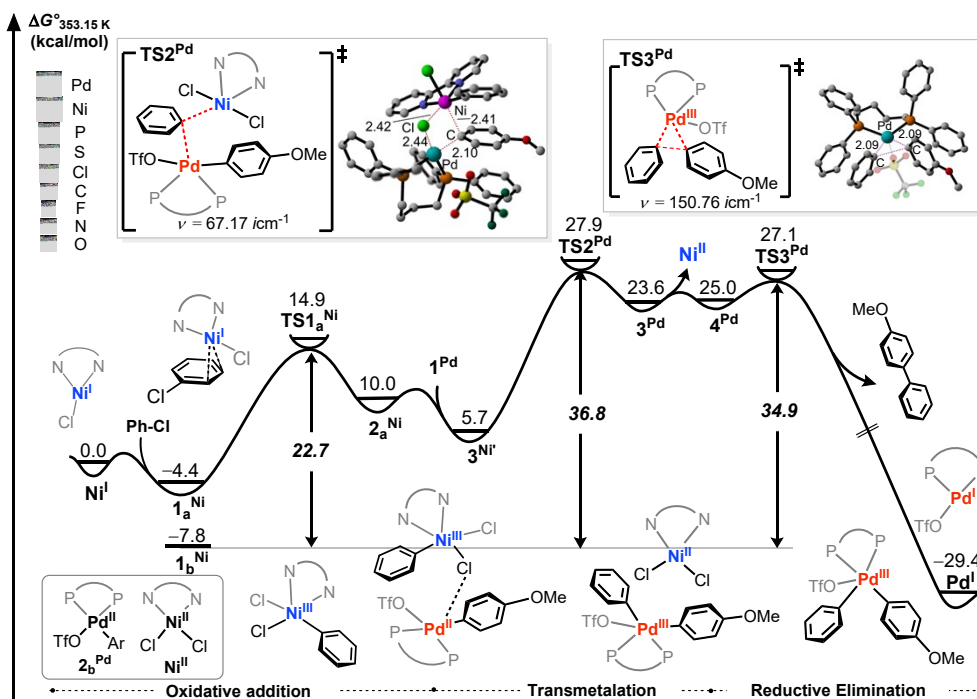

**Fig. S6.** Gibbs energy profiles ( $\Delta G^\circ$ , in kcal/mol) for transmetalation.

It is that phenyl radical migrates from the Ni<sup>III</sup> center to the Pd<sup>II</sup> center in **3<sup>NiI</sup>**, and then the reductive elimination occurs from Pd<sup>III</sup> center in **4<sup>Pd</sup>**.

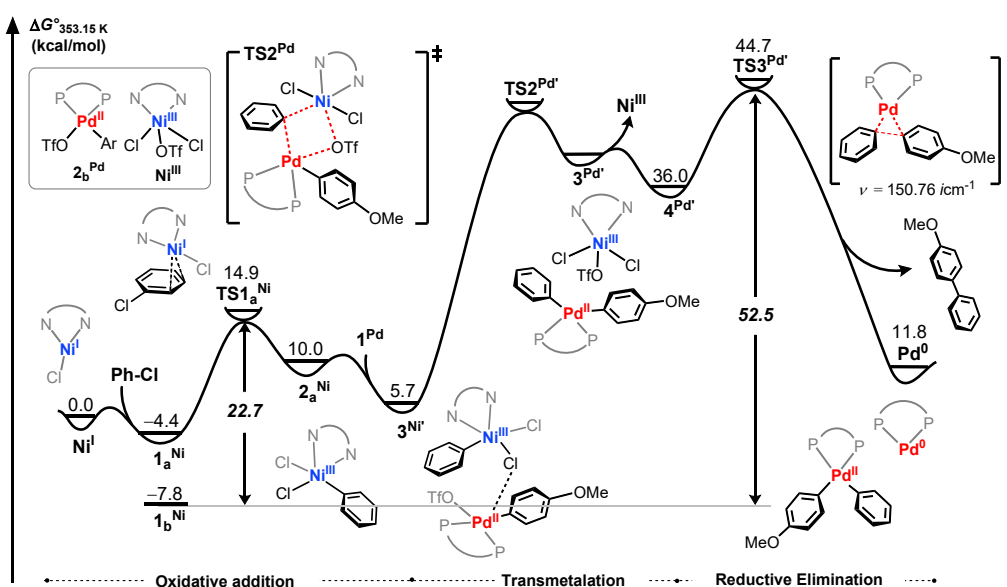

**Fig. S7.** Gibbs energy profiles ( $\Delta G^\circ$ , in kcal/mol) for transmetalation.

It is that phenyl in Ni<sup>III</sup> complex migrates to the Pd<sup>II</sup> center, while the OTf group in Pd<sup>II</sup> complex migrates to the Ni<sup>III</sup> center simultaneously, and then the reductive elimination occurs from Pd<sup>II</sup> center in **4<sup>Pd'</sup>**.

## 5. The relative stability of $\text{Zn}^{\text{II}}\&\text{LiCl}/\text{Zn}(101)$ (IV) and $\text{ZnCl}_2\cdot\text{LiCl}/\text{Zn}(101)$ (V)

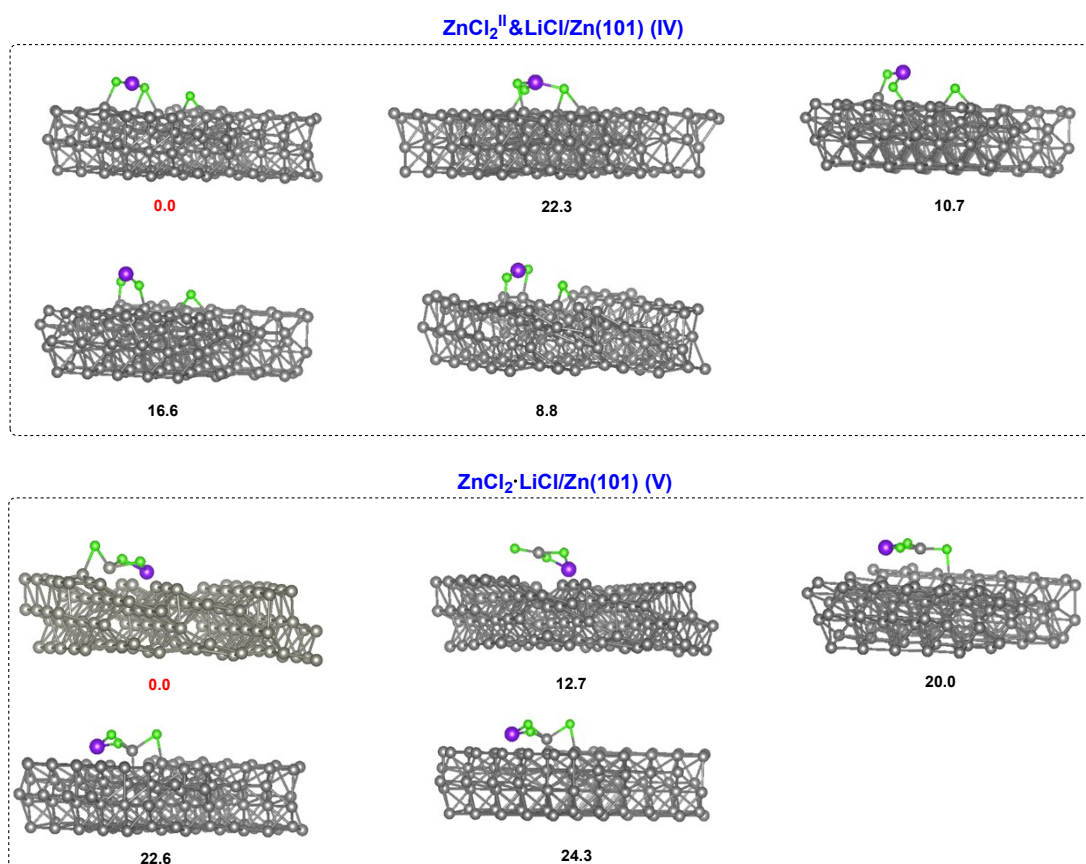

**Fig. S8.** Relative stability of  $\text{ZnCl}_2\cdot\text{LiCl}/\text{Zn}(101)$  (IV) and  $\text{ZnCl}_2\cdot\text{LiCl}/\text{Zn}(101)$  (V). The Gibbs free energies are given in kcal/mol.

## 6. The oxidative addition of substrate to Zn

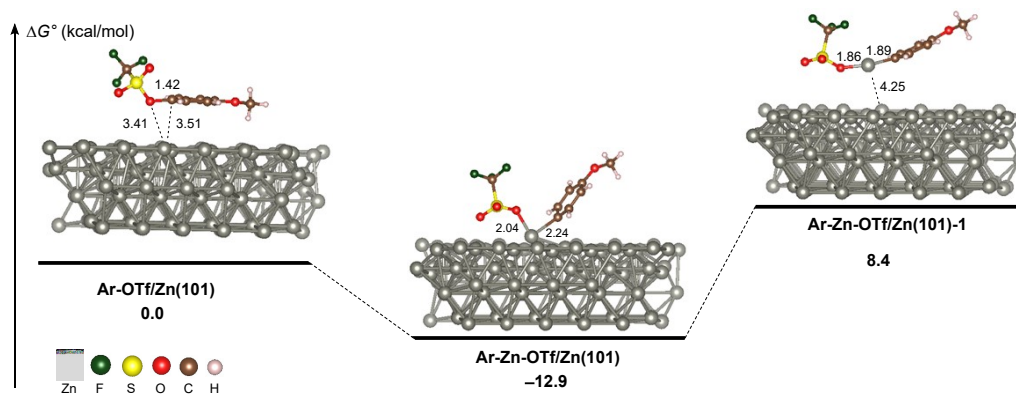

**Fig. S9.** Energy profile of oxidative addition of Ar-OTf by Zn on zinc surface. Gibbs free energies are given in kcal/mol.

## 7. The energy barrier of transmetalation involving other additives

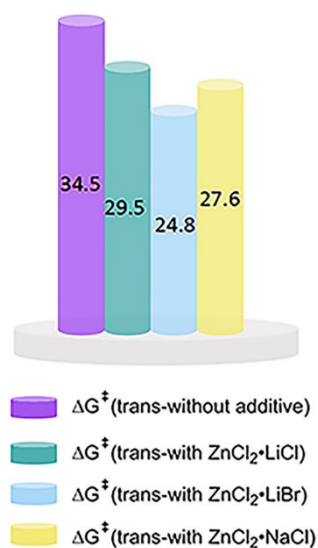

**Fig. S10.** The energy barrier of transmetalation involving other additives.

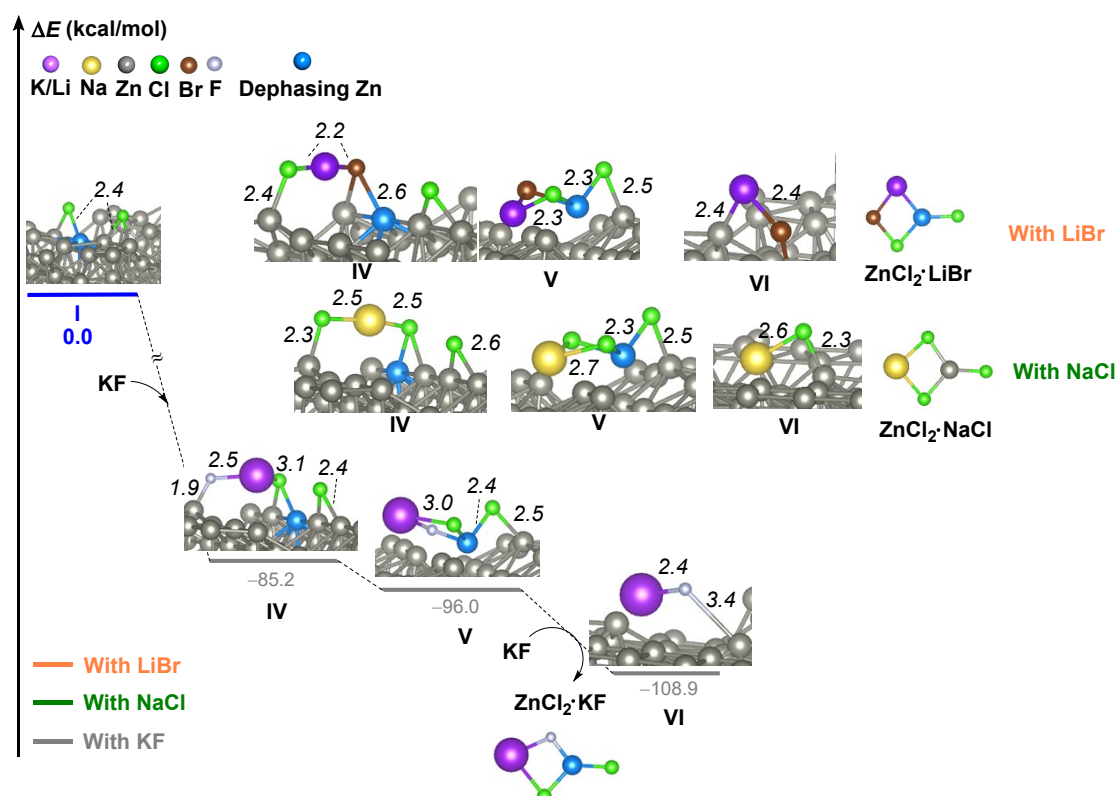

**Fig. S11.** Dissociation of  $\text{ZnCl}_2$  in the absence and presence of additives. Selected bond distances are given in Å.

## Coordinates of All Geometry Optimized Structures

### Ph-Cl

G(Gibbs Free Energy) = -691.579328 hartree

E(electronic Energy) = -691.6341002 hartree

|    |            |             |             |
|----|------------|-------------|-------------|
| C  | 0.00000000 | 1.20385600  | -1.56664900 |
| C  | 0.00000000 | 1.21312100  | -0.17576800 |
| C  | 0.00000000 | 0.00000000  | 0.50098500  |
| C  | 0.00000000 | -1.21312100 | -0.17576800 |
| C  | 0.00000000 | -1.20385600 | -1.56664900 |
| C  | 0.00000000 | 0.00000000  | -2.26307700 |
| H  | 0.00000000 | 2.14715400  | -2.10727100 |
| H  | 0.00000000 | 2.14455700  | 0.38273000  |
| H  | 0.00000000 | -2.14455700 | 0.38273000  |
| H  | 0.00000000 | -2.14715400 | -2.10727100 |
| H  | 0.00000000 | 0.00000000  | -3.34994500 |
| Cl | 0.00000000 | 0.00000000  | 2.25179900  |

### Ar-OTf

G(Gibbs Free Energy) = -1307.025979 hartree

E(electronic Energy) = -1307.1249029 hartree

|   |             |             |             |
|---|-------------|-------------|-------------|
| C | -2.28153700 | -1.25985200 | -0.69360900 |
| C | -0.97127500 | -0.94761900 | -1.00391600 |
| C | -0.50166000 | 0.33294700  | -0.73885000 |
| C | -1.31250600 | 1.30382100  | -0.18115200 |
| C | -2.62945600 | 0.98705100  | 0.13868600  |
| C | -3.11664200 | -0.29580000 | -0.11743000 |
| H | -2.68989300 | -2.24777700 | -0.88612500 |
| H | -0.30527400 | -1.67919600 | -1.45388400 |
| H | -0.91610400 | 2.29650000  | 0.00924200  |
| H | -3.26275500 | 1.74886300  | 0.58161300  |
| O | -4.37768400 | -0.70253700 | 0.15171900  |
| C | -5.26004900 | 0.22585000  | 0.73687600  |
| H | -4.89438600 | 0.57173800  | 1.71383000  |
| H | -5.42133600 | 1.09695100  | 0.08648000  |
| H | -6.20905000 | -0.29468200 | 0.87593000  |
| O | 0.81170400  | 0.64048000  | -1.14099800 |
| S | 1.96583500  | 0.87364000  | -0.03600600 |
| O | 1.42792000  | 1.47996300  | 1.15821500  |
| O | 3.09302500  | 1.40088700  | -0.75822500 |
| C | 2.37316400  | -0.88060600 | 0.38712600  |
| F | 2.57868900  | -1.56670300 | -0.72192700 |
| F | 1.37742100  | -1.42198400 | 1.06466000  |
| F | 3.46672100  | -0.87972800 | 1.12359300  |

**Ni<sup>I</sup>**

G(Gibbs Free Energy) = -1124.514016 hartree

E(electronic Energy) = -1124.6224425 hartree

|    |             |             |             |
|----|-------------|-------------|-------------|
| C  | 0.56520500  | 1.36272700  | -0.00001900 |
| C  | 0.91985300  | 2.70894500  | 0.00055600  |
| C  | -0.08651100 | 3.66572700  | 0.00052100  |
| C  | -1.41577400 | 3.25819600  | -0.00006300 |
| C  | -1.69088900 | 1.89744900  | -0.00055300 |
| N  | -0.72403900 | 0.97871500  | -0.00052800 |
| H  | 0.16684200  | 4.72248100  | 0.00099000  |
| H  | 1.96346000  | 3.01053600  | 0.00114100  |
| H  | -2.22761300 | 3.97864600  | -0.00010300 |
| H  | -2.70722200 | 1.50654700  | -0.00098400 |
| C  | 1.52212000  | 0.24120600  | 0.00000800  |
| C  | 2.90528900  | 0.39507400  | -0.00079500 |
| C  | 1.73057600  | -2.06525500 | 0.00078400  |
| C  | 3.71164400  | -0.73421200 | -0.00077100 |
| H  | 3.34959800  | 1.38625100  | -0.00155400 |
| H  | 1.21261400  | -3.02187800 | 0.00143400  |
| H  | 4.79356300  | -0.63418100 | -0.00142900 |
| C  | 3.11547900  | -1.98983400 | 0.00005400  |
| H  | 3.70887200  | -2.89863700 | 0.00010400  |
| N  | 0.94755300  | -0.98140700 | 0.00074500  |
| Ni | -1.03098000 | -0.99761500 | 0.00021300  |
| Cl | -2.97760000 | -1.91399000 | -0.00031800 |

**1<sub>a</sub><sup>Ni</sup>**

G(Gibbs Free Energy) = -1816.089589 hartree

E(electronic Energy) = -1816.2734729 hartree

|   |             |             |             |
|---|-------------|-------------|-------------|
| C | 0.66730600  | 1.68008200  | 0.56368600  |
| C | 0.59458400  | 3.02274000  | 0.20112700  |
| C | 1.65277300  | 3.58518500  | -0.49995600 |
| C | 2.75293300  | 2.79777700  | -0.82318300 |
| C | 2.75156900  | 1.46680900  | -0.42785500 |
| N | 1.73590600  | 0.92794400  | 0.24814000  |
| H | 1.61698800  | 4.63079700  | -0.79413400 |
| H | -0.27546200 | 3.62152000  | 0.45551800  |
| H | 3.59650800  | 3.20332800  | -1.37297400 |
| H | 3.57324800  | 0.78888100  | -0.65630700 |
| C | -0.39511600 | 0.94818800  | 1.27865300  |
| C | -1.59892300 | 1.52114700  | 1.67919400  |
| C | -1.03924700 | -1.10969900 | 2.11733900  |

|    |             |             |             |
|----|-------------|-------------|-------------|
| C  | -2.54396100 | 0.73134600  | 2.31728900  |
| H  | -1.80366600 | 2.56972000  | 1.48308600  |
| H  | -0.77034900 | -2.15462300 | 2.26028200  |
| H  | -3.49466200 | 1.15698400  | 2.62572900  |
| C  | -2.26170700 | -0.61101400 | 2.54140600  |
| H  | -2.97584400 | -1.26515500 | 3.03138000  |
| N  | -0.12416100 | -0.35478100 | 1.50104400  |
| Ni | 1.55173800  | -1.02239300 | 0.67854000  |
| C  | -0.26115200 | 0.36527400  | -2.35300300 |
| C  | -1.58062300 | 0.61727500  | -1.98784700 |
| C  | -2.33527600 | -0.41952100 | -1.45271400 |
| C  | -1.80657200 | -1.69285500 | -1.27648700 |
| C  | -0.48053800 | -1.92268300 | -1.62865100 |
| C  | 0.29397800  | -0.89633000 | -2.16528100 |
| H  | 0.34068800  | 1.17142800  | -2.76892900 |
| H  | -2.02409200 | 1.60223200  | -2.11368100 |
| H  | -2.42430100 | -2.48248200 | -0.85642000 |
| H  | -0.03395400 | -2.90133600 | -1.46932700 |
| H  | 1.33562900  | -1.08845700 | -2.41239300 |
| Cl | -3.99747600 | -0.10880100 | -0.97984300 |
| Cl | 2.94737100  | -2.52298200 | -0.02942400 |

### TS1<sub>a</sub><sup>Ni</sup>

G(Gibbs Free Energy)=-1816.048819 hartree

E(electronic Energy)=-1816.2368637 hartree

|   |             |             |             |
|---|-------------|-------------|-------------|
| C | -1.59085800 | 1.38536000  | -0.00255100 |
| C | -2.18515400 | 2.59268700  | -0.36028200 |
| C | -1.48332500 | 3.77254600  | -0.15113800 |
| C | -0.21642300 | 3.72082800  | 0.41376000  |
| C | 0.31031800  | 2.47926700  | 0.74861700  |
| N | -0.36212600 | 1.34969700  | 0.53639300  |
| H | -1.92772800 | 4.72555100  | -0.42592800 |
| H | -3.17826800 | 2.61826500  | -0.79856400 |
| H | 0.35827600  | 4.62271800  | 0.59871800  |
| H | 1.28297000  | 2.35273500  | 1.22395500  |
| C | -2.24379600 | 0.06822800  | -0.16672700 |
| C | -3.54997400 | -0.09184200 | -0.62348900 |
| C | -1.99265500 | -2.22260100 | 0.06773500  |
| C | -4.07439100 | -1.37289400 | -0.72784700 |
| H | -4.15567200 | 0.76950500  | -0.88817400 |
| H | -1.31518500 | -3.02865200 | 0.34655800  |
| H | -5.09264200 | -1.51730000 | -1.07923300 |
| C | -3.28691800 | -2.46132700 | -0.37648900 |

|    |             |             |             |
|----|-------------|-------------|-------------|
| H  | -3.66167100 | -3.47774200 | -0.44279100 |
| N  | -1.48906700 | -0.99270000 | 0.16821800  |
| Ni | 0.44615700  | -0.50680100 | 0.89643000  |
| C  | 1.51110200  | -0.14774100 | -3.05569900 |
| C  | 0.92318400  | -0.76367100 | -1.95372400 |
| C  | 1.55799400  | -0.64553100 | -0.72509200 |
| C  | 2.80081000  | -0.04498600 | -0.57316600 |
| C  | 3.36618600  | 0.56528200  | -1.69049600 |
| C  | 2.72510400  | 0.52100600  | -2.92560100 |
| H  | 1.01815600  | -0.20506100 | -4.02397200 |
| H  | -0.00756700 | -1.31610900 | -2.05028100 |
| H  | 3.28383900  | -0.03089000 | 0.40001900  |
| H  | 4.32504600  | 1.06900700  | -1.58921400 |
| H  | 3.18294600  | 0.98956100  | -3.79318800 |
| Cl | 1.34559700  | -2.54521500 | 0.53285100  |
| Cl | 1.65006400  | 0.19181600  | 2.70849800  |

**2<sub>a</sub><sup>Ni</sup>**

G(Gibbs Free Energy) = -1816.051659 hartree

E(electronic Energy) = -1816.2390933 hartree

|    |             |             |             |
|----|-------------|-------------|-------------|
| C  | 1.57453900  | 1.38396200  | 0.09231500  |
| C  | 2.17080900  | 2.58859100  | 0.45508800  |
| C  | 1.46830900  | 3.77127300  | 0.27110200  |
| C  | 0.19413800  | 3.72580500  | -0.27695700 |
| C  | -0.33603400 | 2.49014600  | -0.62299300 |
| N  | 0.33856100  | 1.35594500  | -0.43599400 |
| H  | 1.91716000  | 4.72050200  | 0.55122000  |
| H  | 3.17170700  | 2.60689800  | 0.87501200  |
| H  | -0.38527400 | 4.62823400  | -0.44243200 |
| H  | -1.31267400 | 2.37618500  | -1.09057200 |
| C  | 2.23467500  | 0.07022600  | 0.24014700  |
| C  | 3.52181700  | -0.09889400 | 0.74400100  |
| C  | 1.99434700  | -2.21368000 | -0.07021600 |
| C  | 4.04261500  | -1.38345400 | 0.83049500  |
| H  | 4.11364500  | 0.75339600  | 1.06360800  |
| H  | 1.32244100  | -3.00530500 | -0.40163400 |
| H  | 5.04578400  | -1.53781700 | 1.21912200  |
| C  | 3.27192200  | -2.46199300 | 0.41732000  |
| H  | 3.64661000  | -3.47922700 | 0.47021100  |
| N  | 1.49835300  | -0.98064300 | -0.15399600 |
| Ni | -0.44674000 | -0.45331500 | -0.89342000 |
| C  | -1.67987800 | -0.46327400 | 3.08523600  |
| C  | -0.93763500 | -0.73891400 | 1.93641800  |

|    |             |             |             |
|----|-------------|-------------|-------------|
| C  | -1.50240000 | -0.43235300 | 0.71280000  |
| C  | -2.78709500 | 0.06133600  | 0.57032400  |
| C  | -3.51014600 | 0.33003500  | 1.73318800  |
| C  | -2.95889000 | 0.07365400  | 2.98430500  |
| H  | -1.25273900 | -0.68387100 | 4.06139700  |
| H  | 0.04960900  | -1.18797100 | 2.01002000  |
| H  | -3.20812300 | 0.23150000  | -0.41730900 |
| H  | -4.51850200 | 0.72967800  | 1.64917200  |
| H  | -3.53478300 | 0.27686700  | 3.88387700  |
| Cl | -1.18630700 | -2.52638400 | -0.96512900 |
| Cl | -1.51787500 | 0.37472600  | -2.73495700 |

**1<sub>b</sub><sup>Ni</sup>**

G(Gibbs Free Energy) = -2431.538913 hartree

E(electronic Energy) = -2431.7725024 hartree

|   |             |             |             |
|---|-------------|-------------|-------------|
| C | -0.50928600 | -2.23563800 | -1.23388200 |
| C | 0.60402500  | -1.41577700 | -1.17618700 |
| C | 0.92951600  | -0.80954500 | 0.03040000  |
| C | 0.18210800  | -1.01318200 | 1.17561500  |
| C | -0.93124200 | -1.84516900 | 1.12053400  |
| C | -1.29226700 | -2.44198400 | -0.09059700 |
| H | -0.81395100 | -2.71367300 | -2.16125600 |
| H | 1.21897800  | -1.22406200 | -2.05319300 |
| H | 0.44736700  | -0.50939300 | 2.10131800  |
| H | -1.54417900 | -1.96055800 | 2.00869700  |
| O | -2.38801300 | -3.20873700 | -0.26203700 |
| C | -3.23832500 | -3.40163800 | 0.85751900  |
| H | -2.71987900 | -3.94845600 | 1.65694400  |
| H | -3.60814300 | -2.44555600 | 1.25583500  |
| H | -4.07528400 | -4.00431700 | 0.50073900  |
| O | 1.95796700  | 0.15724700  | 0.00007700  |
| S | 3.33192000  | -0.03316600 | 0.81316800  |
| O | 3.14433300  | -0.83333300 | 1.99858400  |
| O | 3.94993000  | 1.26925500  | 0.82365000  |
| C | 4.26696800  | -1.06648000 | -0.39988800 |
| F | 4.27251000  | -0.46533000 | -1.57638700 |
| F | 3.69013000  | -2.24850400 | -0.51132300 |
| F | 5.50223900  | -1.20766200 | 0.03789400  |
| C | -1.47669200 | 1.30925400  | -1.61817700 |
| C | -1.35702800 | 1.19357200  | -3.00093000 |
| C | -2.27707100 | 0.41599900  | -3.69087700 |
| C | -3.29004600 | -0.22684800 | -2.98841100 |
| C | -3.34882900 | -0.05652900 | -1.61207700 |
| N | -2.46821500 | 0.69453100  | -0.94887700 |



|    |             |             |             |
|----|-------------|-------------|-------------|
| H  | -2.20129500 | 0.31132900  | -4.76998600 |
| H  | -0.55601400 | 1.69822000  | -3.53358200 |
| H  | -4.02312800 | -0.84821100 | -3.49287000 |
| H  | -4.11465500 | -0.53176700 | -1.00052900 |
| C  | -0.54658100 | 2.06837300  | -0.76008700 |
| C  | 0.57934700  | 2.73491000  | -1.23427900 |
| C  | -0.03854500 | 2.66182400  | 1.41797500  |
| C  | 1.42042100  | 3.36928100  | -0.33188900 |
| H  | 0.81086200  | 2.74108400  | -2.29545700 |
| H  | -0.32946400 | 2.60171100  | 2.46521100  |
| H  | 2.31873700  | 3.87210300  | -0.67830100 |
| C  | 1.10992800  | 3.33173200  | 1.02175300  |
| H  | 1.75127300  | 3.80014200  | 1.76128600  |
| N  | -0.84923500 | 2.04190600  | 0.55426500  |
| Ni | -2.42062500 | 0.91923900  | 1.04105000  |
| Cl | -3.76990300 | -0.02450700 | 2.46378800  |

### TS1<sub>b</sub><sup>Ni</sup>

G(Gibbs Free Energy) = -2431.481212 hartree

E(electronic Energy) = -2431.7123944 hartree

|    |             |             |             |
|----|-------------|-------------|-------------|
| C  | -2.52776900 | -1.88235300 | 0.24936400  |
| C  | -3.88232000 | -2.20238500 | 0.28393000  |
| C  | -4.70063900 | -1.54659500 | 1.19519100  |
| C  | -4.15273200 | -0.59839700 | 2.04895900  |
| C  | -2.79123300 | -0.33416700 | 1.95857000  |
| N  | -2.01400800 | -0.95991100 | 1.07770300  |
| H  | -5.76132000 | -1.77965500 | 1.23749600  |
| H  | -4.29881700 | -2.94717500 | -0.38765700 |
| H  | -4.76285000 | -0.07311100 | 2.77680400  |
| H  | -2.27474800 | 0.37447000  | 2.60660600  |
| C  | -1.55037400 | -2.51264800 | -0.66614400 |
| C  | -1.87312700 | -3.54357400 | -1.54448800 |
| C  | 0.65869800  | -2.53631000 | -1.37523500 |
| C  | -0.87930000 | -4.07441200 | -2.35590300 |
| H  | -2.88520000 | -3.93376400 | -1.59327100 |
| H  | 1.64382900  | -2.08723900 | -1.26981000 |
| H  | -1.11284900 | -4.88047100 | -3.04631400 |
| C  | 0.41043500  | -3.56705900 | -2.27245500 |
| H  | 1.21462400  | -3.95591600 | -2.88866200 |
| N  | -0.29729500 | -2.02515700 | -0.59697700 |
| Ni | -0.02079400 | -0.52215900 | 0.80345500  |
| C  | -1.66761200 | 1.93611100  | -2.02720500 |
| C  | -0.76913800 | 0.95991500  | -1.63527000 |
| C  | -0.16275400 | 1.10846100  | -0.39349600 |

|    |             |             |             |
|----|-------------|-------------|-------------|
| C  | -0.23166900 | 2.26849600  | 0.35872900  |
| C  | -1.14204300 | 3.24141100  | -0.05141400 |
| C  | -1.86708200 | 3.07472000  | -1.23389800 |
| H  | -2.21429700 | 1.85564000  | -2.96312000 |
| H  | -0.56892800 | 0.09225500  | -2.25613700 |
| H  | 0.36050400  | 2.38127700  | 1.26086600  |
| H  | -1.25704400 | 4.13202800  | 0.55873100  |
| O  | -2.76606800 | 3.96550700  | -1.71166700 |
| C  | -2.95725500 | 5.15963400  | -0.98972800 |
| H  | -3.33255900 | 4.96392400  | 0.02473600  |
| H  | -2.02919800 | 5.74342000  | -0.92008500 |
| H  | -3.70208200 | 5.73768400  | -1.53948600 |
| O  | 1.51705500  | 0.20350700  | -0.44848900 |
| S  | 2.83805300  | 1.02690300  | -0.36543900 |
| O  | 2.78275700  | 2.09594100  | 0.60976800  |
| O  | 3.35451700  | 1.27512500  | -1.69765400 |
| C  | 3.91250000  | -0.29560700 | 0.34252100  |
| F  | 3.92013500  | -1.34525000 | -0.48039800 |
| F  | 3.47412200  | -0.67999700 | 1.52245500  |
| F  | 5.14442200  | 0.17072900  | 0.45214400  |
| Cl | 0.43645600  | 0.11180600  | 2.91581600  |

## 2<sub>b</sub><sup>Ni</sup>

G(Gibbs Free Energy) = -2431.508793 hartree

E(electronic Energy) = -2431.7402024 hartree

|   |             |             |             |
|---|-------------|-------------|-------------|
| C | -2.53716900 | -2.06637600 | -0.36739000 |
| C | -3.69112100 | -2.84294900 | -0.43355300 |
| C | -4.28474000 | -3.26612100 | 0.74827900  |
| C | -3.71817800 | -2.90680200 | 1.96391800  |
| C | -2.56667700 | -2.13000000 | 1.95160600  |
| N | -1.99772000 | -1.72575700 | 0.81585300  |
| H | -5.18467800 | -3.87455600 | 0.71657800  |
| H | -4.12139200 | -3.12062300 | -1.39074000 |
| H | -4.15391500 | -3.21905100 | 2.90747900  |
| H | -2.06826600 | -1.80073600 | 2.86274200  |
| C | -1.81763100 | -1.55934900 | -1.55509800 |
| C | -2.25897900 | -1.75498100 | -2.85935400 |
| C | 0.04833400  | -0.39423800 | -2.30099800 |
| C | -1.50519500 | -1.24301400 | -3.90799800 |
| H | -3.17834500 | -2.29626500 | -3.06025800 |
| H | 0.96890300  | 0.12600300  | -2.02921700 |
| H | -1.83369000 | -1.38491200 | -4.93415200 |
| C | -0.33482100 | -0.55463900 | -3.62832900 |
| H | 0.28589700  | -0.14360500 | -4.41771900 |

|    |             |             |             |
|----|-------------|-------------|-------------|
| N  | -0.68191900 | -0.88519500 | -1.29810700 |
| Ni | -0.21995900 | -0.57900300 | 0.66243200  |
| C  | -2.62267300 | 2.76260900  | 0.28046100  |
| C  | -2.20198600 | 1.49840900  | 0.66448100  |
| C  | -0.83666500 | 1.26496500  | 0.73511100  |
| C  | 0.10936100  | 2.25848100  | 0.59754600  |
| C  | -0.32442500 | 3.52564900  | 0.20205500  |
| C  | -1.68696000 | 3.77553200  | 0.03621700  |
| H  | -3.67856200 | 2.99592300  | 0.16851100  |
| H  | -2.92767600 | 0.71779900  | 0.87647900  |
| H  | 1.16498500  | 2.07645200  | 0.79799300  |
| H  | 0.41659900  | 4.30529000  | 0.05527200  |
| O  | -2.20716700 | 4.96873200  | -0.33534800 |
| C  | -1.31375800 | 6.03553700  | -0.55374600 |
| H  | -0.75011400 | 6.28466900  | 0.35585400  |
| H  | -0.60398800 | 5.81045400  | -1.36207700 |
| H  | -1.92233700 | 6.89435000  | -0.84248000 |
| O  | 1.75743900  | -0.81372100 | 0.21683100  |
| S  | 2.89455500  | 0.13945900  | -0.02815400 |
| O  | 3.12503100  | 1.08910200  | 1.05412000  |
| O  | 2.88602000  | 0.67538800  | -1.39318100 |
| C  | 4.32067300  | -1.01556000 | 0.02450500  |
| F  | 4.19405300  | -1.94276400 | -0.91800900 |
| F  | 4.38942900  | -1.61077400 | 1.20500300  |
| F  | 5.44205800  | -0.34096200 | -0.18645600 |
| Cl | -0.07028000 | -0.10248500 | 2.80843400  |

### **Pd<sup>0</sup>**

G(Gibbs Free Energy) = -1892.0878 hartree

E(electronic Energy) = -1892.4824623 hartree

|   |             |             |             |
|---|-------------|-------------|-------------|
| P | -2.03867500 | -0.03684500 | 0.01641500  |
| P | 2.05675800  | -0.07342800 | 0.00000900  |
| C | -1.50484400 | 0.23207700  | 1.78283100  |
| H | -2.38240100 | 0.44541600  | 2.41032500  |
| H | -1.14594600 | -0.75699500 | 2.10126100  |
| C | -0.40333000 | 1.29379900  | 1.93963300  |
| H | -0.76438900 | 2.10197700  | 2.59121400  |
| H | -0.19518400 | 1.76624100  | 0.96649300  |
| C | 1.64209000  | -0.34722100 | 1.80712800  |
| H | 2.56948800  | -0.57788600 | 2.35115800  |
| C | 3.03987000  | 1.47677400  | 0.08015400  |
| C | 2.70510500  | 2.50703300  | -0.80006700 |
| C | 4.06545100  | 1.68741400  | 1.00944200  |

|    |             |             |             |
|----|-------------|-------------|-------------|
| H  | 1.89578700  | 2.34366300  | -1.51248300 |
| C  | 3.38474100  | 3.72118900  | -0.76350100 |
| C  | 4.74480000  | 2.89861800  | 1.04776800  |
| H  | 4.34139300  | 0.89388800  | 1.70384300  |
| H  | 3.11425200  | 4.51508900  | -1.45563100 |
| C  | 4.40486900  | 3.91663400  | 0.15966400  |
| H  | 5.54136100  | 3.05114200  | 1.77255100  |
| H  | 4.93687200  | 4.86470400  | 0.19149200  |
| C  | 3.31204700  | -1.40241200 | -0.21125900 |
| C  | 2.86848800  | -2.72473700 | -0.08470800 |
| C  | 4.64557200  | -1.17273400 | -0.55455400 |
| H  | 1.81912100  | -2.92080800 | 0.14115000  |
| C  | 3.74335400  | -3.78752800 | -0.26334500 |
| C  | 5.51911700  | -2.23956900 | -0.74613500 |
| H  | 5.00767600  | -0.15350200 | -0.67490900 |
| H  | 3.38361400  | -4.80820800 | -0.15395500 |
| C  | 5.07447700  | -3.54717000 | -0.59416900 |
| H  | 6.55497500  | -2.04391300 | -1.01468300 |
| H  | 5.75959900  | -4.37868400 | -0.74136200 |
| C  | -3.10349500 | -1.52084600 | 0.23207800  |
| C  | -2.56544800 | -2.76014900 | -0.12175200 |
| C  | -4.38598200 | -1.46721300 | 0.78484500  |
| H  | -1.56779700 | -2.79221200 | -0.56394800 |
| C  | -3.29239900 | -3.92885500 | 0.07826900  |
| C  | -5.11574800 | -2.63436900 | 0.97733500  |
| H  | -4.81704200 | -0.50412800 | 1.05804800  |
| H  | -2.86544800 | -4.88889300 | -0.20280500 |
| C  | -4.56948600 | -3.86572900 | 0.62553100  |
| H  | -6.11530400 | -2.58406200 | 1.40356500  |
| H  | -5.14357900 | -4.77736400 | 0.77497600  |
| C  | -3.27924700 | 1.28987200  | -0.25745000 |
| C  | -3.49210100 | 2.34498400  | 0.63143300  |
| C  | -4.00969700 | 1.25949800  | -1.45174600 |
| H  | -2.93338300 | 2.39806600  | 1.56397200  |
| C  | -4.41716400 | 3.34375500  | 0.33675300  |
| C  | -4.94221500 | 2.24578800  | -1.73870300 |
| H  | -3.84159400 | 0.44690500  | -2.15920900 |
| H  | -4.56890400 | 4.16130900  | 1.03804700  |
| C  | -5.14635700 | 3.29452800  | -0.84427500 |
| H  | -5.50819800 | 2.20202200  | -2.66640600 |
| H  | -5.87037800 | 4.07319200  | -1.07221300 |
| H  | 1.04445600  | -1.26974900 | 1.82016100  |
| Pd | 0.00350500  | -0.14369000 | -1.07987700 |
| C  | 0.91108300  | 0.78323600  | 2.53350700  |

|   |            |            |            |
|---|------------|------------|------------|
| H | 0.72154100 | 0.43787500 | 3.56182700 |
| H | 1.59563700 | 1.63875700 | 2.62727100 |

**1<sub>a</sub>** Pd

G(Gibbs Free Energy) = -2583.668038 hartree

E(electronic Energy) = -2584.141877 hartree

|   |             |             |             |
|---|-------------|-------------|-------------|
| P | 2.16226700  | -0.09390000 | -0.61313900 |
| P | -1.69049000 | -0.16266200 | -1.00102700 |
| C | 1.86501100  | 0.07019600  | -2.43986000 |
| H | 2.80769000  | 0.24652800  | -2.97589700 |
| H | 1.53135000  | -0.92909100 | -2.75472200 |
| C | 0.80882900  | 1.14045500  | -2.74961300 |
| H | 1.26082900  | 1.93536200  | -3.35721100 |
| H | 0.48950100  | 1.63635100  | -1.81858100 |
| C | -1.22581500 | -0.47834200 | -2.78503300 |
| H | -2.13437900 | -0.69449500 | -3.36402400 |
| C | -2.59410300 | 1.43041400  | -1.11272700 |
| C | -2.28779500 | 2.41531800  | -0.17171900 |
| C | -3.54568100 | 1.70706900  | -2.10067500 |
| H | -1.54194800 | 2.19613200  | 0.59400600  |
| C | -2.92299400 | 3.65297000  | -0.21093700 |
| C | -4.17930400 | 2.94278300  | -2.14196600 |
| H | -3.80174900 | 0.94497200  | -2.83687300 |
| H | -2.67856200 | 4.41121100  | 0.52905500  |
| C | -3.86765100 | 3.91647200  | -1.19580100 |
| H | -4.91904600 | 3.14825700  | -2.91245000 |
| H | -4.36452100 | 4.88343900  | -1.22887700 |
| C | -3.01595100 | -1.42204000 | -0.81135000 |
| C | -2.64576600 | -2.76855100 | -0.92372500 |
| C | -4.33465400 | -1.11701200 | -0.46839500 |
| H | -1.61053100 | -3.02627600 | -1.15335200 |
| C | -3.57630800 | -3.78088600 | -0.72954100 |
| C | -5.26390100 | -2.13256600 | -0.26340300 |
| H | -4.63726900 | -0.07780400 | -0.35421600 |
| H | -3.27279000 | -4.82077000 | -0.82871600 |
| C | -4.89141500 | -3.46462700 | -0.39916100 |
| H | -6.28659200 | -1.87764700 | 0.00550400  |
| H | -5.62014500 | -4.25575700 | -0.23951200 |
| C | 3.46677700  | -1.39087900 | -0.60703700 |
| C | 3.04061300  | -2.71366200 | -0.45139800 |
| C | 4.82870500  | -1.13428400 | -0.78033800 |
| H | 1.97763000  | -2.90999000 | -0.29522500 |

|    |             |             |             |
|----|-------------|-------------|-------------|
| C  | 3.95328300  | -3.76136500 | -0.48615600 |
| C  | 5.74389600  | -2.18139000 | -0.80063600 |
| H  | 5.17702800  | -0.10812000 | -0.89180900 |
| H  | 3.60877200  | -4.78625600 | -0.36763600 |
| C  | 5.30827400  | -3.49498300 | -0.65767600 |
| H  | 6.80332900  | -1.97045800 | -0.92907800 |
| H  | 6.02642200  | -4.31157900 | -0.67385900 |
| C  | 3.07634000  | 1.44801200  | -0.20628900 |
| C  | 3.77225200  | 2.22378900  | -1.13802600 |
| C  | 3.04878600  | 1.86464500  | 1.12888700  |
| H  | 3.80020800  | 1.92856300  | -2.18607600 |
| C  | 4.43609700  | 3.38034800  | -0.74202700 |
| C  | 3.71940300  | 3.01529200  | 1.52679800  |
| H  | 2.48023500  | 1.28134000  | 1.85448300  |
| H  | 4.97102600  | 3.97589400  | -1.47849800 |
| C  | 4.41392100  | 3.77555800  | 0.59141000  |
| H  | 3.68952500  | 3.32554700  | 2.56888000  |
| H  | 4.93176200  | 4.68092600  | 0.89955100  |
| H  | -0.65075100 | -1.41548500 | -2.76277100 |
| Pd | 0.12489300  | -0.45097700 | 0.53701200  |
| C  | -0.43153300 | 0.62775900  | -3.47886100 |
| H  | -0.13848400 | 0.25784200  | -4.47326700 |
| H  | -1.10038800 | 1.48150800  | -3.65853500 |
| C  | 0.56980700  | 0.65750600  | 4.07701700  |
| C  | -0.79428900 | 0.92179600  | 3.83856500  |
| C  | -1.51714800 | 0.05028400  | 3.05978900  |
| C  | -0.94050200 | -1.09466100 | 2.46003900  |
| C  | 0.43908500  | -1.32947200 | 2.69205000  |
| C  | 1.17298600  | -0.44786600 | 3.51910300  |
| H  | 1.13852800  | 1.33121000  | 4.71370700  |
| H  | -1.28197100 | 1.78780000  | 4.27770900  |
| H  | -1.59234500 | -1.86687200 | 2.05463600  |
| H  | 0.87740900  | -2.28440100 | 2.40792500  |
| H  | 2.22277700  | -0.65886600 | 3.71383200  |
| Cl | -3.22116400 | 0.35093500  | 2.77552700  |

### **TS1<sub>a</sub><sup>Pd</sup>**

G(Gibbs Free Energy) = -2583.639368 hartree

E(electronic Energy) = -2584.1142353 hartree

|   |             |             |             |
|---|-------------|-------------|-------------|
| P | -1.47264000 | 0.22846900  | -1.11146700 |
| P | 2.05250700  | 0.08211800  | -0.41800400 |
| C | -0.97022200 | 0.11572300  | -2.91817400 |
| H | -1.79018000 | -0.41079400 | -3.42119900 |
| H | -0.94361100 | 1.12683300  | -3.34939100 |

|   |             |             |             |
|---|-------------|-------------|-------------|
| C | 0.34811700  | -0.61945700 | -3.17793800 |
| H | 0.28116500  | -1.11900800 | -4.15409400 |
| H | 0.46467700  | -1.42504300 | -2.43542100 |
| C | 1.90451500  | 1.09042300  | -1.96662700 |
| H | 2.83177700  | 1.65745000  | -2.13341300 |
| C | 3.53283100  | -0.94381900 | -0.77148800 |
| C | 3.37478200  | -2.32978400 | -0.82164400 |
| C | 4.79363300  | -0.38738200 | -1.00890900 |
| H | 2.39372400  | -2.75953600 | -0.61494800 |
| C | 4.46044300  | -3.15006700 | -1.11627400 |
| C | 5.87636000  | -1.20640200 | -1.30083600 |
| H | 4.92916100  | 0.69284600  | -0.94937200 |
| H | 4.33030600  | -4.22908300 | -1.15069100 |
| C | 5.70866500  | -2.58859500 | -1.35734500 |
| H | 6.85562300  | -0.76873500 | -1.48136100 |
| H | 6.55833700  | -3.22861800 | -1.58399900 |
| C | 2.67519100  | 1.28585200  | 0.81698300  |
| C | 2.81161800  | 2.65578800  | 0.58551500  |
| C | 2.94199300  | 0.78589200  | 2.09875800  |
| H | 2.59528500  | 3.07417000  | -0.39555500 |
| C | 3.21435100  | 3.50738200  | 1.61221100  |
| C | 3.35614300  | 1.63332100  | 3.11625600  |
| H | 2.81305000  | -0.28035800 | 2.29403300  |
| H | 3.31352200  | 4.57337400  | 1.41867000  |
| C | 3.49047100  | 2.99954300  | 2.87528800  |
| H | 3.56598100  | 1.22969800  | 4.10399300  |
| H | 3.80578200  | 3.66583500  | 3.67476200  |
| C | -1.45440100 | 2.03788800  | -0.77980600 |
| C | -0.80442200 | 2.50111100  | 0.36630700  |
| C | -2.04436800 | 2.96769300  | -1.64473200 |
| H | -0.34466800 | 1.77838700  | 1.04268700  |
| C | -0.72523100 | 3.86537400  | 0.63475800  |
| C | -1.97259700 | 4.32807300  | -1.37435800 |
| H | -2.57737600 | 2.62187300  | -2.53047700 |
| H | -0.19977800 | 4.20833700  | 1.52321700  |
| C | -1.30735000 | 4.77852000  | -0.23577300 |
| H | -2.43541300 | 5.04096300  | -2.05303900 |
| H | -1.24626300 | 5.84460400  | -0.02914600 |
| C | -3.26431300 | -0.15891100 | -1.18099200 |
| C | -3.65288900 | -1.38744600 | -1.72853100 |
| C | -4.23301000 | 0.63672800  | -0.56550700 |
| H | -2.90081300 | -2.04713200 | -2.16520800 |
| C | -4.98294600 | -1.78668300 | -1.70781400 |
| C | -5.56355800 | 0.23270000  | -0.53618700 |

|    |             |             |             |
|----|-------------|-------------|-------------|
| H  | -3.94602500 | 1.57827600  | -0.10067500 |
| H  | -5.26878300 | -2.73918900 | -2.14840700 |
| C  | -5.94453000 | -0.97325200 | -1.11451400 |
| H  | -6.30708300 | 0.86696000  | -0.05856500 |
| H  | -6.98624200 | -1.28470600 | -1.09459800 |
| H  | 1.10622900  | 1.82715400  | -1.78663000 |
| Pd | 0.00829900  | -0.96448000 | 0.37039400  |
| C  | 1.59988900  | 0.25623000  | -3.21008400 |
| H  | 1.51985500  | 0.94688300  | -4.06326200 |
| H  | 2.46647200  | -0.38640200 | -3.42375600 |
| C  | -3.75879400 | -1.87243800 | 1.98425900  |
| C  | -2.55995400 | -2.33114100 | 1.46187700  |
| C  | -1.37114500 | -1.69738300 | 1.84280200  |
| C  | -1.37134100 | -0.70225800 | 2.82893900  |
| C  | -2.59160700 | -0.24797300 | 3.32427400  |
| C  | -3.78661500 | -0.82415300 | 2.90706500  |
| H  | -4.68899700 | -2.32985400 | 1.65198700  |
| H  | -2.53369000 | -3.14037000 | 0.73543400  |
| H  | -0.42803200 | -0.28661800 | 3.18068300  |
| H  | -2.59869500 | 0.55157000  | 4.06277200  |
| H  | -4.73451900 | -0.47443900 | 3.30810000  |
| Cl | 0.27301300  | -2.91144900 | 1.90613300  |

### 1Pd'

G(Gibbs Free Energy)=-2583.681562 hartree

E(electronic Energy)=-2584.160208 hartree

|   |             |             |             |
|---|-------------|-------------|-------------|
| P | 1.40597800  | -0.36914700 | -1.03906200 |
| P | -2.06966400 | 0.00124600  | -0.43709200 |
| C | 0.85186800  | -0.27632900 | -2.82515600 |
| H | 1.74845500  | -0.05871800 | -3.41643000 |
| H | 0.53796200  | -1.28747700 | -3.11650600 |
| C | -0.25693000 | 0.74424800  | -3.10463300 |
| H | -0.03435500 | 1.27816900  | -4.03745700 |
| H | -0.26449800 | 1.51186400  | -2.31467200 |
| C | -2.06230100 | -0.81154800 | -2.10101700 |
| H | -3.06317000 | -1.21446400 | -2.30881200 |
| C | -3.42504200 | 1.21311300  | -0.63756100 |
| C | -3.13179400 | 2.57730300  | -0.62306300 |
| C | -4.73753300 | 0.78954100  | -0.86716100 |
| H | -2.11833300 | 2.90254100  | -0.39266700 |
| C | -4.14089900 | 3.50772000  | -0.85199400 |
| C | -5.74301400 | 1.72095600  | -1.09035800 |
| H | -4.97579900 | -0.27432300 | -0.85592900 |
| H | -3.90918200 | 4.56971700  | -0.83193900 |



|    |             |             |             |
|----|-------------|-------------|-------------|
| C  | -5.44285500 | 3.08091600  | -1.08659000 |
| H  | -6.76366900 | 1.38728100  | -1.26264900 |
| H  | -6.23124500 | 3.81022600  | -1.25825000 |
| C  | -2.77030000 | -1.29541800 | 0.65217600  |
| C  | -3.01417100 | -2.60471700 | 0.22838200  |
| C  | -3.00564000 | -0.95527100 | 1.99099800  |
| H  | -2.82998200 | -2.89889000 | -0.80257600 |
| C  | -3.49119200 | -3.55736200 | 1.12459900  |
| C  | -3.48897600 | -1.90821900 | 2.87801100  |
| H  | -2.78358800 | 0.05660100  | 2.33330400  |
| H  | -3.67694400 | -4.57299300 | 0.78217700  |
| C  | -3.73144900 | -3.21055700 | 2.44853200  |
| H  | -3.66899000 | -1.63230300 | 3.91418300  |
| H  | -4.10519900 | -3.95507000 | 3.14773100  |
| C  | 1.47997300  | -2.16431400 | -0.70178000 |
| C  | 0.70725100  | -2.69553000 | 0.33268500  |
| C  | 2.25028600  | -3.02301300 | -1.49487400 |
| H  | 0.10748700  | -2.02543500 | 0.95156400  |
| C  | 0.69477300  | -4.06791700 | 0.56654900  |
| C  | 2.24157600  | -4.39050500 | -1.25586000 |
| H  | 2.86711300  | -2.61521700 | -2.29565500 |
| H  | 0.08262500  | -4.47029300 | 1.37002200  |
| C  | 1.46149400  | -4.91324800 | -0.22604500 |
| H  | 2.84415800  | -5.05251400 | -1.87314300 |
| H  | 1.45501600  | -5.98509200 | -0.04258900 |
| C  | 3.14946000  | 0.16468900  | -1.14747600 |
| C  | 3.46908100  | 1.28667400  | -1.91709500 |
| C  | 4.14057600  | -0.43276900 | -0.36711400 |
| H  | 2.69677800  | 1.78979600  | -2.50047600 |
| C  | 4.76403800  | 1.78936900  | -1.92421600 |
| C  | 5.43520900  | 0.07231800  | -0.37558600 |
| H  | 3.89626100  | -1.28649300 | 0.26220500  |
| H  | 5.00168000  | 2.66251800  | -2.52706000 |
| C  | 5.74999100  | 1.18015100  | -1.15516300 |
| H  | 6.19932800  | -0.39839500 | 0.23803700  |
| H  | 6.76311100  | 1.57476000  | -1.15698000 |
| H  | -1.38068600 | -1.67294600 | -2.03386200 |
| Pd | 0.06608900  | 0.75035700  | 0.48546000  |
| C  | -1.64534300 | 0.12006800  | -3.23581300 |
| H  | -1.68565500 | -0.45479400 | -4.17281100 |
| H  | -2.39128500 | 0.92077000  | -3.33754700 |
| C  | 1.79115600  | 1.20741800  | 1.47903800  |
| C  | 2.23099200  | 0.34537900  | 2.48086300  |
| C  | 3.39413100  | 0.63704300  | 3.19350300  |

|    |             |             |            |
|----|-------------|-------------|------------|
| C  | 4.11780700  | 1.79011800  | 2.91046600 |
| C  | 3.66941100  | 2.65733100  | 1.91823300 |
| C  | 2.50890700  | 2.36797500  | 1.20413000 |
| H  | 1.66556700  | -0.55552400 | 2.71996400 |
| H  | 3.72989100  | -0.04042200 | 3.97712900 |
| H  | 5.02527400  | 2.01713000  | 3.46605200 |
| H  | 4.22630600  | 3.56603400  | 1.69509200 |
| H  | 2.16831900  | 3.05306300  | 0.42779900 |
| Cl | -1.07887200 | 2.03996200  | 2.14977900 |

### 1<sub>b</sub><sup>Pd</sup>

G(Gibbs Free Energy) = -3199.117482 hartree

E(electronic Energy) = -3199.6439712 hartree

|   |             |             |             |
|---|-------------|-------------|-------------|
| P | -0.63856800 | 2.06936500  | 0.55101400  |
| P | 2.90336100  | 0.54646300  | 0.23194000  |
| C | 0.43359300  | 3.48092700  | 1.10600500  |
| H | -0.16231200 | 4.39810900  | 1.20699900  |
| H | 0.75106100  | 3.21421200  | 2.12410200  |
| C | 1.64660900  | 3.68775700  | 0.18485000  |
| H | 1.67010300  | 4.72944300  | -0.16332100 |
| H | 1.54125900  | 3.07351200  | -0.72399900 |
| C | 3.20730300  | 1.97702100  | 1.38380600  |
| H | 4.21463800  | 1.89007700  | 1.81739400  |
| C | 4.30711400  | 0.60877200  | -0.95167200 |
| C | 4.26631500  | -0.29259900 | -2.02230700 |
| C | 5.40877900  | 1.45971400  | -0.82903800 |
| H | 3.41720100  | -0.97084100 | -2.11862300 |
| C | 5.30509800  | -0.34251900 | -2.94326100 |
| C | 6.44196700  | 1.41881200  | -1.76114900 |
| H | 5.47559300  | 2.15555000  | 0.00559300  |
| H | 5.26282100  | -1.05205100 | -3.76656300 |
| C | 6.39209000  | 0.51836100  | -2.81890500 |
| H | 7.29094100  | 2.09056700  | -1.65549700 |
| H | 7.20004300  | 0.48691900  | -3.54615700 |
| C | 3.42189300  | -0.82728200 | 1.34830000  |
| C | 2.42473100  | -1.48101500 | 2.07900800  |
| C | 4.74794100  | -1.24633100 | 1.48942100  |
| H | 1.38543300  | -1.17185400 | 1.94773700  |
| C | 2.74598300  | -2.52283300 | 2.94334900  |
| C | 5.06816700  | -2.29377400 | 2.34660400  |
| H | 5.53533200  | -0.75483600 | 0.91882300  |
| H | 1.95804300  | -3.02240400 | 3.50311300  |
| C | 4.06908400  | -2.93292200 | 3.07606600  |
| H | 6.10342800  | -2.61261600 | 2.44640400  |

|    |             |             |             |
|----|-------------|-------------|-------------|
| H  | 4.32215600  | -3.75263300 | 3.74463200  |
| C  | -1.77373300 | 1.83895800  | 1.97448100  |
| C  | -1.88585000 | 0.56753800  | 2.53801900  |
| C  | -2.55058900 | 2.88375300  | 2.48571300  |
| H  | -1.29504000 | -0.25019400 | 2.12344600  |
| C  | -2.76238200 | 0.33874500  | 3.59472200  |
| C  | -3.41543700 | 2.65929800  | 3.54831400  |
| H  | -2.49201800 | 3.87420600  | 2.03423000  |
| H  | -2.85878400 | -0.66024200 | 4.01296100  |
| C  | -3.52319400 | 1.38496900  | 4.10156600  |
| H  | -4.01791100 | 3.47572300  | 3.94017000  |
| H  | -4.21189000 | 1.20744400  | 4.92428500  |
| C  | -1.76172700 | 2.84338600  | -0.67742400 |
| C  | -1.52370900 | 4.07921700  | -1.28016800 |
| C  | -2.88023600 | 2.10064700  | -1.07788300 |
| H  | -0.65910000 | 4.67474900  | -0.99125700 |
| C  | -2.38700100 | 4.56477700  | -2.26015000 |
| C  | -3.74430700 | 2.58971400  | -2.04647200 |
| H  | -3.07724800 | 1.13328900  | -0.61199400 |
| H  | -2.18864100 | 5.52964800  | -2.72169900 |
| C  | -3.49769200 | 3.82437600  | -2.64371400 |
| H  | -4.61279400 | 2.00397900  | -2.33818500 |
| H  | -4.17132100 | 4.20605200  | -3.40721700 |
| H  | 2.51024000  | 1.77907400  | 2.21250800  |
| Pd | 0.59377300  | 0.25688900  | -0.35171100 |
| C  | 2.99877300  | 3.38720200  | 0.83018200  |
| H  | 3.15984500  | 4.09489500  | 1.65794700  |
| H  | 3.78163300  | 3.60728200  | 0.09075900  |
| C  | 0.38290100  | -1.59373900 | -1.64926500 |
| C  | -0.92147700 | -1.21135500 | -1.25216600 |
| C  | -1.53467500 | -1.96774800 | -0.22423200 |
| C  | -0.91549600 | -3.01937200 | 0.39424700  |
| C  | 0.38129200  | -3.40267800 | -0.00934300 |
| C  | 1.01729100  | -2.69558100 | -1.01066700 |
| H  | 0.81550600  | -1.23020900 | -2.57981800 |
| H  | -1.53206500 | -0.55029800 | -1.86409300 |
| H  | -1.42683500 | -3.55991900 | 1.18551100  |
| H  | 0.86394100  | -4.24095600 | 0.48247700  |
| O  | 2.26444700  | -2.95405500 | -1.46895100 |
| C  | 3.05243900  | -3.88139000 | -0.75529400 |
| H  | 3.09442900  | -3.62764500 | 0.31319300  |
| H  | 2.67222900  | -4.90581200 | -0.87310800 |
| H  | 4.05834000  | -3.81881000 | -1.17756800 |
| O  | -5.03701700 | -1.95429800 | 1.07907700  |

|   |             |             |             |
|---|-------------|-------------|-------------|
| S | -4.12543000 | -2.39278800 | 0.05354800  |
| O | -3.81389700 | -3.78018200 | -0.19184600 |
| O | -2.79196400 | -1.50519900 | 0.22858600  |
| C | -4.74072600 | -1.69858700 | -1.54125500 |
| F | -4.95587700 | -0.40075600 | -1.40814600 |
| F | -5.86950200 | -2.30525800 | -1.85354000 |
| F | -3.84530800 | -1.90382800 | -2.49078300 |

### TS1<sub>b</sub><sup>Pd</sup>

G(Gibbs Free Energy)=-3199.082381 hartree

E(electronic Energy)=-3199.6056655 hartree

|   |             |             |             |
|---|-------------|-------------|-------------|
| C | -0.76588600 | -2.93030700 | -0.03875700 |
| C | 0.15287000  | -3.92720900 | 0.21256600  |
| C | 1.48069800  | -3.83717300 | -0.25981600 |
| C | 1.88151900  | -2.75598700 | -1.02781800 |
| C | 0.96781800  | -1.71343300 | -1.28417400 |
| C | -0.29061800 | -1.78543900 | -0.67997700 |
| H | -1.78632000 | -2.98312400 | 0.33452400  |
| H | -0.12041700 | -4.79865900 | 0.80377900  |
| H | 2.87641800  | -2.69984000 | -1.46107600 |
| H | 1.20548900  | -0.93268400 | -2.00466200 |
| O | 2.27856100  | -4.88573700 | 0.07573400  |
| C | 3.57762700  | -4.90619300 | -0.46279800 |
| H | 4.16824100  | -4.03659500 | -0.13556900 |
| H | 4.05161600  | -5.81987700 | -0.09816900 |
| H | 3.55911600  | -4.92571500 | -1.56203400 |
| O | -1.78303300 | -1.23826000 | -2.02399400 |
| S | -1.55975500 | -0.02982900 | -2.89536200 |
| O | -0.40661300 | 0.78017000  | -2.46439400 |
| O | -2.78660300 | 0.67116500  | -3.24507700 |
| C | -0.98615000 | -0.78468000 | -4.47153800 |
| F | -1.92096300 | -1.57770300 | -4.97127700 |
| F | 0.11560100  | -1.50189600 | -4.26296200 |
| F | -0.71045100 | 0.16771400  | -5.35173900 |
| P | -1.71391600 | 0.46919500  | 1.58509600  |
| P | 1.90655000  | 1.39001400  | 0.98302700  |
| C | -1.16829400 | 1.52156300  | 3.00867000  |
| H | -2.01328700 | 1.68247800  | 3.69061700  |
| H | -0.45787100 | 0.89737900  | 3.56682300  |
| C | -0.52301000 | 2.83847800  | 2.55322500  |
| H | -1.14656100 | 3.68444900  | 2.86843100  |
| H | -0.50537800 | 2.89124300  | 1.45238600  |
| C | 1.89988200  | 1.95937700  | 2.75137500  |
| H | 2.91417700  | 2.27325400  | 3.03288300  |

|   |             |             |             |
|---|-------------|-------------|-------------|
| C | 2.39217000  | 2.87296400  | 0.03683200  |
| C | 1.73382500  | 3.11124700  | -1.17333400 |
| C | 3.36746100  | 3.77374800  | 0.48064100  |
| H | 0.96887700  | 2.41578400  | -1.52413300 |
| C | 2.05444100  | 4.23475600  | -1.93043400 |
| C | 3.68238200  | 4.89422800  | -0.27709700 |
| H | 3.89053200  | 3.59462800  | 1.42022700  |
| H | 1.53792300  | 4.41303600  | -2.87002300 |
| C | 3.02421100  | 5.12425100  | -1.48332200 |
| H | 4.44099400  | 5.59059000  | 0.07259300  |
| H | 3.26979100  | 6.00339300  | -2.07455500 |
| C | 3.37208000  | 0.28413600  | 0.99874000  |
| C | 3.23039200  | -0.94475400 | 1.65551500  |
| C | 4.56673500  | 0.56059400  | 0.33254900  |
| H | 2.28013200  | -1.19927100 | 2.12884200  |
| C | 4.26999200  | -1.86416300 | 1.67169200  |
| C | 5.60303300  | -0.36988100 | 0.33448800  |
| H | 4.68731100  | 1.50338700  | -0.19802800 |
| H | 4.14091800  | -2.81538400 | 2.18502600  |
| C | 5.46104400  | -1.57778800 | 1.00782000  |
| H | 6.52733000  | -0.14557100 | -0.19290500 |
| H | 6.27401600  | -2.30072600 | 1.01010100  |
| C | -2.32173700 | -1.03726600 | 2.43149800  |
| C | -1.37181700 | -1.86967100 | 3.03517700  |
| C | -3.66193600 | -1.42758600 | 2.43185700  |
| H | -0.31581200 | -1.59544900 | 2.99891700  |
| C | -1.75472400 | -3.05642200 | 3.64493400  |
| C | -4.04258100 | -2.62630600 | 3.02888900  |
| H | -4.41079100 | -0.79626200 | 1.95736600  |
| H | -1.00546800 | -3.69318100 | 4.10970400  |
| C | -3.09348400 | -3.43981100 | 3.63720100  |
| H | -5.08839700 | -2.92394900 | 3.01718000  |
| H | -3.39453500 | -4.37645800 | 4.10023400  |
| C | -3.22294300 | 1.29128600  | 0.97229800  |
| C | -3.83705600 | 2.35663200  | 1.63767200  |
| C | -3.77611200 | 0.82224200  | -0.22298500 |
| H | -3.42767600 | 2.74053000  | 2.56957300  |
| C | -4.98297700 | 2.94249600  | 1.11250400  |
| C | -4.92143400 | 1.41006800  | -0.74542500 |
| H | -3.30487700 | -0.00417200 | -0.75413100 |
| H | -5.45131700 | 3.77345900  | 1.63505200  |
| C | -5.52498300 | 2.47111900  | -0.07900400 |
| H | -5.31778000 | 1.04713500  | -1.68979600 |
| H | -6.41525900 | 2.93874200  | -0.49299100 |

|    |            |            |            |
|----|------------|------------|------------|
| H  | 1.69773900 | 1.05014200 | 3.33614700 |
| Pd | 0.12223100 | 0.00987100 | 0.14737700 |
| C  | 0.89485500 | 3.06280200 | 3.07594400 |
| H  | 0.86909700 | 3.19067900 | 4.16810400 |
| H  | 1.26604200 | 4.01243200 | 2.66620300 |

### 1Pd

G(Gibbs Free Energy) = -3199.135345 hartree

E(electronic Energy) = -3199.6619974 hartree

|   |             |             |             |
|---|-------------|-------------|-------------|
| C | 2.31728700  | 1.39436700  | -1.02564100 |
| C | 3.51200500  | 2.10243000  | -1.04952500 |
| C | 4.19165500  | 2.38035200  | 0.13811100  |
| C | 3.65465600  | 1.96991800  | 1.35760400  |
| C | 2.45973700  | 1.25023800  | 1.36902500  |
| C | 1.79252600  | 0.94962400  | 0.18762100  |
| H | 1.78458900  | 1.21281200  | -1.95756500 |
| H | 3.93987900  | 2.45860900  | -1.98393800 |
| H | 4.15749900  | 2.18293500  | 2.29691300  |
| H | 2.07133000  | 0.90291600  | 2.32675300  |
| O | 5.36861100  | 3.05140000  | 0.00428100  |
| C | 6.10368100  | 3.30649400  | 1.17168200  |
| H | 6.37824400  | 2.37527400  | 1.69157000  |
| H | 7.01499800  | 3.82300000  | 0.86238500  |
| H | 5.55158800  | 3.94876700  | 1.87339900  |
| O | -0.79179100 | 1.34053300  | -2.28646900 |
| S | -1.48597100 | 2.18113400  | -1.29940000 |
| O | -1.01551300 | 1.94862800  | 0.11052000  |
| O | -2.93822200 | 2.27393400  | -1.41983300 |
| C | -0.86966200 | 3.88159800  | -1.62544900 |
| F | -1.22864300 | 4.25224200  | -2.84791700 |
| F | 0.45189900  | 3.92120400  | -1.53699000 |
| F | -1.38675900 | 4.72994700  | -0.74855300 |
| P | 1.31474500  | -1.85328900 | 0.18441600  |
| P | -2.19661500 | -0.95399500 | 0.96079300  |
| C | 0.56089300  | -3.44689000 | 0.75062400  |
| H | 1.30117500  | -4.23400900 | 0.55936600  |
| H | 0.44241900  | -3.39839700 | 1.84070400  |
| C | -0.77498300 | -3.73891400 | 0.05417800  |
| H | -0.70065500 | -4.69013800 | -0.48605500 |
| H | -0.97660800 | -2.98853500 | -0.72570200 |
| C | -2.17377400 | -2.56894600 | 1.87637100  |
| H | -3.10901900 | -2.66641600 | 2.44371800  |
| C | -3.49354600 | -1.22137600 | -0.29954600 |
| C | -3.20917100 | -0.99751600 | -1.64674400 |

|    |             |             |             |
|----|-------------|-------------|-------------|
| C  | -4.77003800 | -1.65779900 | 0.07362500  |
| H  | -2.23215900 | -0.61524000 | -1.94241400 |
| C  | -4.18836100 | -1.21706900 | -2.61163800 |
| C  | -5.74138700 | -1.88271100 | -0.89142700 |
| H  | -5.00833200 | -1.80707000 | 1.12676400  |
| H  | -3.96393200 | -1.02323100 | -3.65717300 |
| C  | -5.44846200 | -1.66366400 | -2.23621400 |
| H  | -6.73190000 | -2.22077000 | -0.59612000 |
| H  | -6.21284500 | -1.83234900 | -2.99117900 |
| C  | -2.98161400 | 0.16839300  | 2.17328800  |
| C  | -2.83791900 | -0.02806100 | 3.54953700  |
| C  | -3.67019500 | 1.29435500  | 1.70854700  |
| H  | -2.29532700 | -0.89034200 | 3.93313200  |
| C  | -3.39094600 | 0.87610900  | 4.45038900  |
| C  | -4.22340700 | 2.19061700  | 2.61383000  |
| H  | -3.76187800 | 1.48070500  | 0.63887000  |
| H  | -3.27775900 | 0.71024600  | 5.51929200  |
| C  | -4.08752600 | 1.98442400  | 3.98333400  |
| H  | -4.75778700 | 3.06141800  | 2.24251600  |
| H  | -4.52047700 | 2.69150300  | 4.68707200  |
| C  | 2.93834300  | -1.83913500 | 1.01510900  |
| C  | 3.00196500  | -2.07618100 | 2.39078500  |
| C  | 4.09575200  | -1.45657200 | 0.33302100  |
| H  | 2.10244300  | -2.34240000 | 2.94571000  |
| C  | 4.20627500  | -1.94249900 | 3.07186000  |
| C  | 5.29696600  | -1.32021600 | 1.01666700  |
| H  | 4.05094600  | -1.23317300 | -0.73096900 |
| H  | 4.24515600  | -2.12877700 | 4.14237900  |
| C  | 5.35510900  | -1.56344600 | 2.38532300  |
| H  | 6.18835200  | -1.00846200 | 0.47747400  |
| H  | 6.29568000  | -1.45195000 | 2.91948800  |
| C  | 1.64823200  | -2.21845600 | -1.57395700 |
| C  | 2.47679800  | -3.29035100 | -1.92635200 |
| C  | 1.01838300  | -1.47540200 | -2.57488100 |
| H  | 2.98275400  | -3.86896800 | -1.15379000 |
| C  | 2.67723800  | -3.60903800 | -3.26248700 |
| C  | 1.22023000  | -1.80220800 | -3.91315800 |
| H  | 0.37451800  | -0.63352600 | -2.31448300 |
| H  | 3.32692700  | -4.43901400 | -3.52951600 |
| C  | 2.04695300  | -2.86463400 | -4.25691500 |
| H  | 0.72874500  | -1.21552700 | -4.68490200 |
| H  | 2.20485400  | -3.11516400 | -5.30325900 |
| H  | -1.36892700 | -2.48167300 | 2.62068900  |
| Pd | -0.00978000 | -0.00331100 | 0.36369200  |

|   |             |             |            |
|---|-------------|-------------|------------|
| C | -1.96992800 | -3.80139700 | 1.00009400 |
| H | -1.86901200 | -4.67595500 | 1.65939900 |
| H | -2.87775700 | -3.96881200 | 0.40493800 |

## 2Pd

G(Gibbs Free Energy) = -4652.912226 hartree

E(electronic Energy) = -4653.4318118 hartree

|   |             |             |             |
|---|-------------|-------------|-------------|
| C | -2.26204300 | -1.96814700 | 0.70114600  |
| C | -3.63151800 | -2.01855300 | 0.89951800  |
| C | -4.34020800 | -0.84398000 | 1.17345200  |
| C | -3.65448600 | 0.36659700  | 1.33006300  |
| C | -2.27560000 | 0.39046200  | 1.18982200  |
| C | -1.53761500 | -0.76036900 | 0.84536300  |
| H | -1.74231000 | -2.88600300 | 0.42149300  |
| H | -4.19027300 | -2.94569500 | 0.79594400  |
| H | -4.18000200 | 1.29108900  | 1.54972300  |
| H | -1.75572700 | 1.33894000  | 1.31904500  |
| O | -5.67695100 | -0.97494000 | 1.25296900  |
| C | -6.44897400 | 0.19554800  | 1.42316900  |
| H | -6.28032300 | 0.90558300  | 0.60204400  |
| H | -7.49272700 | -0.12244400 | 1.41750900  |
| H | -6.22951000 | 0.68871500  | 2.37921800  |
| O | -0.06708200 | 2.44428600  | -1.04111300 |
| S | -0.44937700 | 3.87998200  | -1.13868300 |
| O | -1.44552200 | 4.15977000  | -2.17585000 |
| O | 0.68740600  | 4.79669900  | -1.03628500 |
| C | -1.36825900 | 4.12873100  | 0.43369800  |
| F | -0.63286500 | 3.73167700  | 1.47283100  |
| F | -2.49698000 | 3.40830000  | 0.43068000  |
| F | -1.69112100 | 5.40174900  | 0.60476100  |
| P | -0.51200500 | -0.62407700 | -1.93401100 |
| P | 2.60002400  | 0.58433900  | -0.52840300 |
| C | 0.36989100  | 0.19138900  | -3.32744700 |
| H | -0.24380800 | 0.03530200  | -4.22376200 |
| H | 0.34015700  | 1.26563800  | -3.10444500 |
| C | 1.79912300  | -0.33309200 | -3.50594200 |
| H | 1.88463900  | -0.83030700 | -4.47995400 |
| H | 2.02018200  | -1.12416900 | -2.77146300 |
| C | 2.84992700  | 1.53952900  | -2.09337400 |
| H | 3.78015800  | 2.11019500  | -1.97696400 |
| C | 3.80828600  | -0.78614200 | -0.56771700 |
| C | 3.47432600  | -2.00105700 | 0.03458900  |
| C | 5.07575600  | -0.63354100 | -1.13886900 |
| H | 2.49904700  | -2.11412500 | 0.50841100  |



|    |             |             |             |
|----|-------------|-------------|-------------|
| C  | 4.38244500  | -3.05434600 | 0.05124300  |
| C  | 5.98097900  | -1.68774700 | -1.12696700 |
| H  | 5.36366400  | 0.31999900  | -1.58034100 |
| H  | 4.10810000  | -3.99263700 | 0.52809200  |
| C  | 5.63327100  | -2.89980600 | -0.53600000 |
| H  | 6.96338800  | -1.56208300 | -1.57577200 |
| H  | 6.34433100  | -3.72252600 | -0.52791700 |
| C  | 3.27553300  | 1.73749500  | 0.71596300  |
| C  | 2.74271100  | 3.02785500  | 0.78594000  |
| C  | 4.25068900  | 1.33760100  | 1.63253500  |
| H  | 1.97234700  | 3.35785800  | 0.09247600  |
| C  | 3.19323000  | 3.90974600  | 1.75981900  |
| C  | 4.69618100  | 2.22742000  | 2.60319100  |
| H  | 4.65554800  | 0.32770500  | 1.59908100  |
| H  | 2.76808100  | 4.90985900  | 1.79979900  |
| C  | 4.16787100  | 3.51243800  | 2.66942300  |
| H  | 5.45512600  | 1.91066400  | 3.31478700  |
| H  | 4.51481900  | 4.20366700  | 3.43413400  |
| C  | -2.25886900 | -0.17002300 | -2.21516300 |
| C  | -2.57306800 | 1.18009400  | -2.40103100 |
| C  | -3.28508400 | -1.11971500 | -2.21421000 |
| H  | -1.80103100 | 1.94239100  | -2.40623800 |
| C  | -3.89515300 | 1.57528100  | -2.55816000 |
| C  | -4.60682100 | -0.71846600 | -2.37709900 |
| H  | -3.05762500 | -2.17551100 | -2.08246200 |
| H  | -4.10672600 | 2.63420800  | -2.68648000 |
| C  | -4.91464300 | 0.62888700  | -2.54171300 |
| H  | -5.39838900 | -1.46469100 | -2.36602700 |
| H  | -5.95072800 | 0.93766900  | -2.66456600 |
| C  | -0.37766600 | -2.40438700 | -2.32880400 |
| C  | -0.79683600 | -2.89440700 | -3.57096200 |
| C  | 0.20482000  | -3.28082200 | -1.41227600 |
| H  | -1.25805500 | -2.22445200 | -4.29596000 |
| C  | -0.64016400 | -4.23956800 | -3.88012500 |
| C  | 0.35985400  | -4.62808000 | -1.72140200 |
| H  | 0.53805900  | -2.90302000 | -0.44547000 |
| H  | -0.96945100 | -4.61313500 | -4.84663800 |
| C  | -0.06226900 | -5.10712700 | -2.95602600 |
| H  | 0.81174300  | -5.29623200 | -0.99186200 |
| H  | 0.05857700  | -6.15920100 | -3.20277900 |
| H  | 2.03639000  | 2.27728400  | -2.07849200 |
| Pd | 0.40091000  | -0.19015100 | 0.15064200  |
| C  | 2.87160500  | 0.74158500  | -3.39434200 |
| H  | 2.77354900  | 1.45192400  | -4.22716300 |

|    |             |             |             |
|----|-------------|-------------|-------------|
| H  | 3.85098900  | 0.25956400  | -3.51629800 |
| Zn | -0.45521100 | -1.47524900 | 2.58453300  |
| Cl | 0.47616500  | -3.69950800 | 2.39195800  |
| Cl | -1.70378700 | -1.85383700 | 4.54404700  |
| Li | -0.70671700 | -3.85581200 | 4.30977800  |
| Cl | 1.18554600  | 0.13725200  | 2.54573300  |

## TS2

G(Gibbs Free Energy) = -4652.883826 hartree

E(electronic Energy) = -4653.401504 hartree

|   |             |             |             |
|---|-------------|-------------|-------------|
| C | -2.81049500 | -2.21312500 | 1.75473500  |
| C | -4.15211800 | -2.17638700 | 1.40281500  |
| C | -4.81294500 | -0.94706800 | 1.31712700  |
| C | -4.11937200 | 0.23343000  | 1.56957200  |
| C | -2.77208500 | 0.16752300  | 1.92551600  |
| C | -2.07754000 | -1.04445100 | 2.03185400  |
| H | -2.32446700 | -3.18840500 | 1.82837100  |
| H | -4.72081000 | -3.08296600 | 1.20387400  |
| H | -4.60124900 | 1.20334600  | 1.48165300  |
| H | -2.25568600 | 1.10881100  | 2.10880400  |
| O | -6.12751100 | -1.00752400 | 0.95921700  |
| C | -6.85279700 | 0.19787000  | 0.95483700  |
| H | -6.46699700 | 0.90413800  | 0.20426400  |
| H | -7.88481700 | -0.06027800 | 0.70615800  |
| H | -6.83178500 | 0.68656800  | 1.93904100  |
| O | -1.21471200 | 2.06462400  | 0.13386900  |
| S | -0.86229200 | 3.27919100  | -0.67330300 |
| O | -2.00651300 | 3.97915700  | -1.23991900 |
| O | 0.28002500  | 3.04157100  | -1.58339800 |
| C | -0.19812100 | 4.43757100  | 0.59083300  |
| F | 0.88468500  | 3.92774400  | 1.16791800  |
| F | -1.11121700 | 4.67025500  | 1.51897000  |
| F | 0.13443900  | 5.58418200  | 0.01025600  |
| P | -0.68496400 | -0.40168000 | -2.02933100 |
| P | 2.52033800  | 0.20890800  | -1.00915200 |
| C | 0.01248600  | -0.00910700 | -3.68586200 |
| H | -0.76397500 | -0.27504300 | -4.41407100 |
| H | 0.11443500  | 1.08341300  | -3.73462400 |
| C | 1.33873000  | -0.72166200 | -3.97175200 |
| H | 1.28991600  | -1.18549300 | -4.96467000 |
| H | 1.48503400  | -1.56324200 | -3.27803900 |
| C | 2.69504100  | 1.03179000  | -2.65926600 |
| H | 3.67829300  | 1.51937900  | -2.64354300 |

|   |             |             |             |
|---|-------------|-------------|-------------|
| C | 3.32665100  | -1.41235900 | -1.07449300 |
| C | 2.79177100  | -2.46578000 | -0.33532800 |
| C | 4.51528500  | -1.59636600 | -1.79250700 |
| H | 1.89029600  | -2.31866900 | 0.25540500  |
| C | 3.42046000  | -3.70620700 | -0.33135200 |
| C | 5.13734500  | -2.83748300 | -1.78881900 |
| H | 4.96642900  | -0.76544200 | -2.33384500 |
| H | 2.98831400  | -4.51517500 | 0.25305400  |
| C | 4.58608300  | -3.89343000 | -1.06447100 |
| H | 6.05876700  | -2.98149800 | -2.34753500 |
| H | 5.07760200  | -4.86337300 | -1.06699300 |
| C | 3.58490800  | 1.25551000  | 0.02703800  |
| C | 3.37057400  | 2.63764100  | 0.02139400  |
| C | 4.55562400  | 0.69764100  | 0.86058300  |
| H | 2.57522200  | 3.07183600  | -0.58425900 |
| C | 4.13822500  | 3.45370100  | 0.84040600  |
| C | 5.32350200  | 1.52466100  | 1.67081400  |
| H | 4.70294200  | -0.38020700 | 0.88705500  |
| H | 3.95756800  | 4.52552800  | 0.84791800  |
| C | 5.11486200  | 2.89957900  | 1.66239000  |
| H | 6.07953000  | 1.09058800  | 2.32014400  |
| H | 5.70854700  | 3.54197500  | 2.30808800  |
| C | -2.41836500 | 0.11218600  | -2.15493900 |
| C | -2.73219600 | 1.35960200  | -2.70487900 |
| C | -3.43902100 | -0.73718400 | -1.71929400 |
| H | -1.94933800 | 2.05385000  | -3.00317100 |
| C | -4.05807800 | 1.74180500  | -2.83772500 |
| C | -4.76637300 | -0.35494000 | -1.87434600 |
| H | -3.20520400 | -1.69191800 | -1.25130600 |
| H | -4.29059600 | 2.72320600  | -3.24176600 |
| C | -5.07451400 | 0.88030900  | -2.43374900 |
| H | -5.55548400 | -1.01434100 | -1.51922900 |
| H | -6.11465500 | 1.18053600  | -2.54356500 |
| C | -0.73344200 | -2.22269600 | -1.95695100 |
| C | -1.00886900 | -2.97317000 | -3.10672800 |
| C | -0.54890400 | -2.87791900 | -0.73998500 |
| H | -1.17953600 | -2.47843400 | -4.06183900 |
| C | -1.07397300 | -4.35784900 | -3.03537400 |
| C | -0.61111000 | -4.26608000 | -0.67100400 |
| H | -0.37248200 | -2.30427100 | 0.17012800  |
| H | -1.28602700 | -4.93445300 | -3.93232300 |
| C | -0.86872600 | -5.00518500 | -1.81864400 |
| H | -0.45186900 | -4.75230400 | 0.28943200  |
| H | -0.91600000 | -6.09035000 | -1.76846400 |

|    |             |             |             |
|----|-------------|-------------|-------------|
| H  | 1.95278500  | 1.84220600  | -2.63023100 |
| Pd | 0.38010200  | 0.43064300  | -0.15439900 |
| C  | 2.55569200  | 0.18700400  | -3.91979900 |
| H  | 2.53008500  | 0.88343000  | -4.76999600 |
| H  | 3.45270300  | -0.43025900 | -4.05837500 |
| Zn | -0.24348200 | -1.05435900 | 2.86255700  |
| Cl | 0.92568500  | -3.29704200 | 2.53839000  |
| Cl | 0.19359400  | -1.02646500 | 5.24881600  |
| Li | 1.18152600  | -2.92752000 | 4.72299800  |
| Cl | 1.26619900  | 0.68980400  | 2.13061200  |

### **Pd<sup>II</sup>**

G(Gibbs Free Energy) = -3313.516783 hartree

E(electronic Energy) = -3313.9309663 hartree

|    |             |             |             |
|----|-------------|-------------|-------------|
| O  | 1.37838600  | 2.57354300  | 0.32893100  |
| S  | 2.31815000  | 1.87646900  | -0.54918000 |
| O  | 1.69665600  | 0.68840200  | -1.25898300 |
| O  | 3.64075700  | 1.56199100  | -0.01373900 |
| C  | 2.62695600  | 3.01930700  | -1.95599900 |
| F  | 3.20815800  | 4.12077900  | -1.49662100 |
| F  | 1.49535100  | 3.34191100  | -2.55176100 |
| F  | 3.43523200  | 2.44208400  | -2.83546900 |
| Cl | -1.38621900 | 1.56309200  | -1.88917500 |
| P  | 1.00703200  | -1.57117100 | 0.66782900  |
| P  | -2.27486700 | -0.24745200 | 0.43914000  |
| C  | 0.12261100  | -3.04973400 | 1.36460300  |
| H  | 0.82152000  | -3.89019100 | 1.27389800  |
| H  | 0.01231200  | -2.86395200 | 2.44124500  |
| C  | -1.22988800 | -3.37593600 | 0.72880000  |
| H  | -1.32789600 | -4.46261100 | 0.61088400  |
| H  | -1.28834400 | -2.96269100 | -0.29042500 |
| C  | -2.37860800 | -1.38850300 | 1.89505800  |
| H  | -3.28136100 | -1.11051800 | 2.45536600  |
| C  | -3.58854900 | -0.86370500 | -0.65930300 |
| C  | -3.30688700 | -1.20518600 | -1.98271800 |
| C  | -4.87883200 | -1.06021900 | -0.15261400 |
| H  | -2.31193100 | -1.01858400 | -2.38203400 |
| C  | -4.30511600 | -1.74150600 | -2.78894800 |
| C  | -5.87385100 | -1.58941300 | -0.96442600 |
| H  | -5.11327600 | -0.78802700 | 0.87623700  |
| H  | -4.08073700 | -1.99990900 | -3.82046300 |
| C  | -5.58520000 | -1.93283900 | -2.28246200 |
| H  | -6.87602700 | -1.73224900 | -0.56810200 |
| H  | -6.36478600 | -2.34721000 | -2.91710900 |

|    |             |             |             |
|----|-------------|-------------|-------------|
| C  | -2.81201200 | 1.33472700  | 1.15401200  |
| C  | -2.09232200 | 1.84858100  | 2.23650300  |
| C  | -3.87565400 | 2.06202600  | 0.61927400  |
| H  | -1.23012100 | 1.31013400  | 2.63020600  |
| C  | -2.45508100 | 3.06576300  | 2.79744300  |
| C  | -4.23513900 | 3.27819700  | 1.18675500  |
| H  | -4.40955500 | 1.68697000  | -0.25063600 |
| H  | -1.88813300 | 3.46444800  | 3.63454100  |
| C  | -3.52983500 | 3.77858300  | 2.27550700  |
| H  | -5.06261300 | 3.84353800  | 0.76585200  |
| H  | -3.80888200 | 4.73483900  | 2.71090900  |
| C  | 1.99503200  | -0.99385100 | 2.08301900  |
| C  | 1.85660600  | 0.31001700  | 2.55880000  |
| C  | 2.87534700  | -1.87837000 | 2.71873600  |
| H  | 1.21734500  | 1.02093800  | 2.03556100  |
| C  | 2.59071000  | 0.72407200  | 3.66679800  |
| C  | 3.59857000  | -1.46114100 | 3.82646300  |
| H  | 3.00782300  | -2.88963100 | 2.33512500  |
| H  | 2.49631600  | 1.74801400  | 4.01793200  |
| C  | 3.45418900  | -0.15893400 | 4.30127700  |
| H  | 4.28456600  | -2.14838500 | 4.31556400  |
| H  | 4.03013000  | 0.16902500  | 5.16330200  |
| C  | 2.18850000  | -2.30755300 | -0.50697200 |
| C  | 1.82980400  | -3.44134000 | -1.24286500 |
| C  | 3.42951200  | -1.70127100 | -0.72593700 |
| H  | 0.86004500  | -3.91515600 | -1.09415700 |
| C  | 2.71033400  | -3.97707700 | -2.17467500 |
| C  | 4.30687000  | -2.24876200 | -1.65336000 |
| H  | 3.70461300  | -0.79327000 | -0.19105400 |
| H  | 2.42600700  | -4.86005500 | -2.74176600 |
| C  | 3.95132100  | -3.38228900 | -2.37700200 |
| H  | 5.27107900  | -1.77510500 | -1.81780900 |
| H  | 4.64101800  | -3.80089500 | -3.10600700 |
| H  | -1.52944500 | -1.13961700 | 2.54753800  |
| Pd | -0.21268400 | 0.07122600  | -0.46448700 |
| C  | -2.40817900 | -2.87482200 | 1.55520800  |
| H  | -2.44268700 | -3.43416600 | 2.50142000  |
| H  | -3.34299100 | -3.10616600 | 1.02784200  |

### **3Ni**

G(Gibbs Free Energy) = -3155.430997 hartree

E(electronic Energy) = -3155.71966 hartree

|   |            |            |             |
|---|------------|------------|-------------|
| C | 2.50250600 | 0.01744900 | -1.41750200 |
|---|------------|------------|-------------|

|    |             |             |             |
|----|-------------|-------------|-------------|
| C  | 2.95997600  | -0.40259000 | -2.66044700 |
| C  | 2.03932000  | -0.69550700 | -3.65849500 |
| C  | 0.68690600  | -0.55605400 | -3.39401000 |
| C  | 0.29769700  | -0.13553400 | -2.12925900 |
| N  | 1.18278000  | 0.13516500  | -1.17264200 |
| H  | 2.38125400  | -1.03070900 | -4.63354700 |
| H  | 4.02465100  | -0.49374600 | -2.85204700 |
| H  | -0.06882700 | -0.79048900 | -4.13609100 |
| H  | -0.75320300 | -0.02709500 | -1.86218000 |
| C  | 3.39069900  | 0.38534000  | -0.29934900 |
| C  | 4.77558800  | 0.24731400  | -0.31465900 |
| C  | 3.44410700  | 1.22734900  | 1.86790400  |
| C  | 5.49692700  | 0.62343300  | 0.81059500  |
| H  | 5.28458600  | -0.16032500 | -1.18258300 |
| H  | 2.84179300  | 1.58924300  | 2.70052600  |
| H  | 6.57853900  | 0.51892100  | 0.82093400  |
| C  | 4.82784500  | 1.12166200  | 1.92150700  |
| H  | 5.36122600  | 1.41450000  | 2.81997300  |
| N  | 2.76310600  | 0.87645400  | 0.77951200  |
| Ni | 0.73126000  | 0.69829700  | 0.68536900  |
| C  | 0.73305800  | 4.61723800  | -0.81401000 |
| C  | 1.15075200  | 3.47189200  | -0.13271900 |
| C  | 0.25781000  | 2.42404500  | -0.03082200 |
| C  | -1.02871300 | 2.47495800  | -0.53127500 |
| C  | -1.42799000 | 3.62660300  | -1.20919800 |
| C  | -0.54778800 | 4.69435900  | -1.35164700 |
| H  | 1.41888300  | 5.45614100  | -0.91324600 |
| H  | 2.14277500  | 3.42240400  | 0.30909700  |
| H  | -1.72804500 | 1.65195800  | -0.39559500 |
| H  | -2.43990800 | 3.67371100  | -1.60893100 |
| H  | -0.86324100 | 5.59425600  | -1.87395300 |
| Cl | 0.10892800  | 1.58682700  | 2.59665600  |
| Cl | 1.02162700  | -1.56657900 | 1.46784100  |
| C  | -3.58655400 | 0.80634200  | 1.06370300  |
| C  | -2.66010900 | -0.23393300 | 1.17968000  |
| C  | -2.33384900 | -1.08413700 | 0.11518200  |
| C  | -3.01190200 | -0.84515500 | -1.09493300 |
| C  | -3.92675300 | 0.18911900  | -1.24433200 |
| C  | -4.21223700 | 1.02775900  | -0.16167100 |
| H  | -3.77563100 | 1.44834100  | 1.91995000  |
| H  | -2.16212800 | -0.35209600 | 2.14338500  |
| H  | -2.81159400 | -1.48365900 | -1.95949300 |
| H  | -4.43841800 | 0.37466400  | -2.18683300 |
| Zn | -0.91940300 | -2.50648300 | 0.38697200  |

|    |             |             |             |
|----|-------------|-------------|-------------|
| Cl | -1.18755800 | -4.66646500 | 1.44054400  |
| Cl | 0.01776500  | -3.47081600 | -1.74255700 |
| Li | -0.25905000 | -5.27632100 | -0.47786000 |
| O  | -5.09130900 | 2.03687700  | -0.40984200 |
| C  | -5.34049500 | 2.94548900  | 0.63383600  |
| H  | -6.03715600 | 3.68915000  | 0.24080700  |
| H  | -4.41866500 | 3.45058200  | 0.95933200  |
| H  | -5.79739500 | 2.45393700  | 1.50450100  |

### TS3

G(Gibbs Free Energy) = -3155.42222 hartree

E(electronic Energy) = -3155.7113701 hartree

|    |             |             |             |
|----|-------------|-------------|-------------|
| C  | 2.77150900  | 0.16448500  | 1.12804700  |
| C  | 3.49410700  | 0.55602800  | 2.25115000  |
| C  | 2.85200300  | 0.63982600  | 3.47805000  |
| C  | 1.50972400  | 0.30224900  | 3.56010700  |
| C  | 0.85091000  | -0.06418200 | 2.39574100  |
| N  | 1.45433800  | -0.10456500 | 1.20867800  |
| H  | 3.40319300  | 0.94386900  | 4.36368800  |
| H  | 4.55700900  | 0.76217800  | 2.17117200  |
| H  | 0.97007700  | 0.33036800  | 4.50072800  |
| H  | -0.19734000 | -0.34707300 | 2.40012600  |
| C  | 3.40083000  | -0.07235200 | -0.18469000 |
| C  | 4.66864600  | 0.38856500  | -0.52427000 |
| C  | 3.13479000  | -1.07263700 | -2.24956800 |
| C  | 5.16927500  | 0.08723900  | -1.78390800 |
| H  | 5.24353600  | 0.99796600  | 0.16670300  |
| H  | 2.45616500  | -1.62364200 | -2.89924100 |
| H  | 6.15132300  | 0.44664400  | -2.07998800 |
| C  | 4.39871400  | -0.66434300 | -2.65981400 |
| H  | 4.75514000  | -0.91639400 | -3.65356900 |
| N  | 2.65602700  | -0.78447300 | -1.04251000 |
| Ni | 0.51428800  | -0.61932200 | -0.54016100 |
| C  | 1.08711400  | -4.34184200 | 1.24448800  |
| C  | 1.27961800  | -3.15966300 | 0.52913300  |
| C  | 0.16714200  | -2.40805400 | 0.19035100  |
| C  | -1.12328000 | -2.82999400 | 0.45461200  |
| C  | -1.29408900 | -4.01186600 | 1.17601400  |
| C  | -0.19541600 | -4.76423500 | 1.57531700  |
| H  | 1.95337700  | -4.93202500 | 1.53687500  |
| H  | 2.28186200  | -2.83767400 | 0.26161000  |
| H  | -1.98439300 | -2.27134000 | 0.10293500  |
| H  | -2.30343800 | -4.34757800 | 1.40455200  |
| H  | -0.33919300 | -5.68938300 | 2.12827800  |

|    |             |             |             |
|----|-------------|-------------|-------------|
| Cl | -0.07580500 | -1.67952700 | -2.42777800 |
| Cl | 1.09051800  | 1.68287800  | -1.65686900 |
| C  | -3.75853500 | -0.45639800 | -1.11313500 |
| C  | -2.45552400 | 0.03208500  | -1.15479800 |
| C  | -1.70072500 | 0.32273800  | -0.00170500 |
| C  | -2.39466200 | 0.16871900  | 1.22230000  |
| C  | -3.69097700 | -0.30714600 | 1.29919600  |
| C  | -4.37713200 | -0.64108700 | 0.12456300  |
| H  | -4.27885800 | -0.67550100 | -2.04095300 |
| H  | -2.00191700 | 0.17444100  | -2.13472200 |
| H  | -1.92173900 | 0.46754700  | 2.15945700  |
| H  | -4.21124800 | -0.41554700 | 2.24816600  |
| Zn | -0.64523800 | 2.09070900  | -0.19971500 |
| Cl | -1.99026900 | 3.97106600  | -0.91037300 |
| Cl | 0.11262900  | 3.16073900  | 1.87685600  |
| Li | -1.12253800 | 4.78464500  | 0.95708500  |
| O  | -5.63339800 | -1.11038100 | 0.29228100  |
| C  | -6.37501200 | -1.43632500 | -0.86060900 |
| H  | -7.34571300 | -1.79432500 | -0.51250400 |
| H  | -5.88745000 | -2.22885400 | -1.44481100 |
| H  | -6.52549100 | -0.56007700 | -1.50588000 |

#### 4<sup>Ni</sup>

G(Gibbs Free Energy) = -3155.447916 hartree

E(electronic Energy) = -3155.7359449 hartree

|   |             |             |             |
|---|-------------|-------------|-------------|
| C | -2.14788500 | -2.15889100 | 0.72614500  |
| C | -1.99980000 | -3.39566100 | 1.34660500  |
| C | -0.85824900 | -3.64160700 | 2.09915700  |
| C | 0.09868400  | -2.64637400 | 2.22292900  |
| C | -0.11337800 | -1.44630000 | 1.55635900  |
| N | -1.19812900 | -1.21058500 | 0.82209400  |
| H | -0.72199400 | -4.60536300 | 2.58224800  |
| H | -2.75836600 | -4.16477800 | 1.23805500  |
| H | 1.01072600  | -2.78618200 | 2.79531100  |
| H | 0.62060900  | -0.64329800 | 1.61241300  |
| C | -3.34008300 | -1.77735800 | -0.05713400 |
| C | -4.48843400 | -2.56178500 | -0.13853700 |
| C | -4.29729900 | -0.14958100 | -1.40215500 |
| C | -5.56738600 | -2.10049900 | -0.87868400 |
| H | -4.54470400 | -3.51635500 | 0.37533000  |
| H | -4.14205700 | 0.80222200  | -1.90606100 |
| H | -6.47265300 | -2.69744600 | -0.95163500 |
| C | -5.47642500 | -0.87267900 | -1.51997300 |
| H | -6.29774900 | -0.47744200 | -2.10891700 |



|    |             |             |             |
|----|-------------|-------------|-------------|
| N  | -3.26313200 | -0.59250800 | -0.68655900 |
| Ni | -1.50018300 | 0.43438500  | -0.52545700 |
| C  | -3.31631700 | 2.58678000  | 2.52161400  |
| C  | -2.60445400 | 1.61496300  | 1.81844600  |
| C  | -2.24564900 | 1.85539500  | 0.49731800  |
| C  | -2.56743900 | 3.05393400  | -0.12686800 |
| C  | -3.27940100 | 4.01844000  | 0.58612100  |
| C  | -3.65333500 | 3.78832700  | 1.90645100  |
| H  | -3.60885200 | 2.39922400  | 3.55323200  |
| H  | -2.33465500 | 0.67779700  | 2.30564400  |
| H  | -2.26873400 | 3.22454500  | -1.15915300 |
| H  | -3.53467900 | 4.96013000  | 0.10366800  |
| H  | -4.20444300 | 4.54671600  | 2.45785900  |
| Cl | -1.63387600 | 0.99744100  | -2.77889400 |
| Cl | 1.51682700  | -2.52485200 | -1.23995000 |
| C  | 2.46541500  | 1.38804200  | -1.02824300 |
| C  | 1.11425800  | 1.05401700  | -1.18603100 |
| C  | 0.18018600  | 1.29311600  | -0.16749100 |
| C  | 0.63535700  | 1.91119200  | 0.99922000  |
| C  | 1.97603700  | 2.25863100  | 1.16932200  |
| C  | 2.88391300  | 1.99444500  | 0.15944100  |
| H  | 3.15655500  | 1.24149800  | -1.85651800 |
| H  | 0.79394800  | 0.60944800  | -2.12551100 |
| H  | -0.05700500 | 2.12590900  | 1.81071300  |
| H  | 2.32623100  | 2.71865500  | 2.09038900  |
| Zn | 2.98778600  | -1.14171900 | -0.37056200 |
| Cl | 5.19286900  | -0.68146800 | -1.01209100 |
| Cl | 3.31349700  | -0.88388300 | 1.95412100  |
| Li | 4.95539900  | 0.48788300  | 1.01105000  |
| O  | 4.22898400  | 2.26217500  | 0.40955500  |
| C  | 4.92981800  | 2.93138500  | -0.64497200 |
| H  | 5.84466900  | 3.33687400  | -0.20670200 |
| H  | 4.31832600  | 3.75109500  | -1.03586300 |
| H  | 5.18995500  | 2.23550900  | -1.45160200 |

### **5Ni**

G(Gibbs Free Energy) = -1701.669029 hartree

E(electronic Energy) = -1701.9669667 hartree

|   |            |             |            |
|---|------------|-------------|------------|
| C | 0.64309100 | -1.45367300 | 3.32487800 |
| C | 0.46530800 | -0.67917400 | 2.17890500 |
| C | 0.36117100 | -1.29817300 | 0.93783900 |
| C | 0.42088200 | -2.68504200 | 0.83630900 |
| C | 0.59854100 | -3.45274500 | 1.98641200 |

|    |             |             |             |
|----|-------------|-------------|-------------|
| C  | 0.70891300  | -2.84000800 | 3.23108000  |
| H  | 0.72364600  | -0.96840900 | 4.29630800  |
| H  | 0.38814600  | 0.40434800  | 2.27384200  |
| H  | 0.31266000  | -3.15971400 | -0.13825500 |
| H  | 0.64068000  | -4.53756800 | 1.90692100  |
| H  | 0.83989400  | -3.44236400 | 4.12731300  |
| C  | 2.86091600  | 0.98118000  | -0.27410900 |
| C  | 4.23753100  | 1.19053400  | -0.24490000 |
| C  | 5.07741700  | 0.20803000  | -0.75101800 |
| C  | 4.52539100  | -0.95052800 | -1.27933400 |
| C  | 3.14242200  | -1.08220800 | -1.28979100 |
| N  | 2.33845700  | -0.14010200 | -0.79825200 |
| H  | 6.15460400  | 0.35183700  | -0.73634800 |
| H  | 4.65183600  | 2.11041300  | 0.15649200  |
| H  | 5.14817700  | -1.74050100 | -1.68679500 |
| H  | 2.63260400  | -1.94400400 | -1.71974100 |
| C  | 1.87918000  | 1.95412800  | 0.24893300  |
| C  | 2.23895500  | 3.09359200  | 0.96618500  |
| C  | -0.36757800 | 2.47076500  | 0.45935100  |
| C  | 1.24179100  | 3.93972100  | 1.43009300  |
| H  | 3.28182400  | 3.31166300  | 1.17531600  |
| H  | -1.39026200 | 2.16283600  | 0.24089900  |
| H  | 1.50253900  | 4.83085300  | 1.99501500  |
| C  | -0.08687000 | 3.63016900  | 1.17063200  |
| H  | -0.89578000 | 4.26550100  | 1.51717700  |
| N  | 0.58956500  | 1.65812900  | 0.01088500  |
| Ni | 0.28686800  | -0.35095300 | -0.71362800 |
| C  | -2.15418300 | 0.41237100  | -1.52287300 |
| C  | -3.49955000 | 0.74904800  | -1.54357800 |
| C  | -4.34423800 | 0.31949200  | -0.51700800 |
| C  | -3.82455500 | -0.44452400 | 0.52333700  |
| C  | -2.46299200 | -0.76401700 | 0.54333700  |
| C  | -1.61327400 | -0.33207100 | -0.46513500 |
| H  | -1.52196400 | 0.73147800  | -2.35180900 |
| H  | -3.92687000 | 1.32558900  | -2.36088200 |
| H  | -4.46009000 | -0.79996200 | 1.32990100  |
| H  | -2.08948200 | -1.35641600 | 1.37494000  |
| O  | -5.64747100 | 0.69559300  | -0.62653100 |
| C  | -6.53804100 | 0.24152400  | 0.35886800  |
| H  | -6.27217700 | 0.61911000  | 1.35755600  |
| H  | -7.52525800 | 0.62234800  | 0.08826100  |
| H  | -6.57736900 | -0.85681200 | 0.39883800  |
| Cl | 0.23368100  | -1.62028200 | -2.62294300 |

## TS4

G(Gibbs Free Energy) = -1701.66492 hartree

E(electronic Energy) = -1701.9629817 hartree

|    |             |             |             |
|----|-------------|-------------|-------------|
| C  | 0.17598000  | 0.05791600  | -3.62072900 |
| C  | -0.03811800 | -0.32841100 | -2.29973100 |
| C  | -0.11689000 | 0.63524300  | -1.29829500 |
| C  | -0.02230300 | 1.98865600  | -1.63157500 |
| C  | 0.20189700  | 2.36722300  | -2.95237400 |
| C  | 0.30292200  | 1.40316800  | -3.95107700 |
| H  | 0.23457900  | -0.70165200 | -4.39825800 |
| H  | -0.15844200 | -1.38351200 | -2.06350200 |
| H  | -0.12547100 | 2.74116300  | -0.84883200 |
| H  | 0.29256700  | 3.42309900  | -3.20031700 |
| H  | 0.46729800  | 1.69999600  | -4.98431400 |
| C  | 3.09489200  | -0.23764300 | 0.59464300  |
| C  | 4.46938300  | -0.03195400 | 0.70728800  |
| C  | 4.94019000  | 1.24300800  | 0.98573000  |
| C  | 4.03074300  | 2.27694600  | 1.15360100  |
| C  | 2.67582100  | 1.99049900  | 1.04959900  |
| N  | 2.22297000  | 0.76574200  | 0.77535600  |
| H  | 6.00850000  | 1.42202500  | 1.07539800  |
| H  | 5.16889800  | -0.85347600 | 0.59004500  |
| H  | 4.35531500  | 3.28873400  | 1.37502600  |
| H  | 1.90266400  | 2.73904400  | 1.21933000  |
| C  | 2.50402100  | -1.55462900 | 0.27162700  |
| C  | 3.29020100  | -2.65247600 | -0.08336300 |
| C  | 0.58425900  | -2.79604900 | 0.00348600  |
| C  | 2.67902900  | -3.85705900 | -0.39135600 |
| H  | 4.37069800  | -2.56572000 | -0.13430100 |
| H  | -0.50412000 | -2.80847600 | 0.02418800  |
| H  | 3.27811700  | -4.72003800 | -0.66959200 |
| C  | 1.29421500  | -3.93505900 | -0.34928000 |
| H  | 0.76631700  | -4.85229700 | -0.59042600 |
| N  | 1.16288200  | -1.63478900 | 0.31723100  |
| Ni | 0.17543500  | 0.40075800  | 0.57280800  |
| C  | -2.06921400 | -1.03770500 | 0.89931500  |
| C  | -3.40613300 | -1.35246600 | 1.10573300  |
| C  | -4.40553000 | -0.54188000 | 0.57160300  |
| C  | -4.04766800 | 0.59836300  | -0.14638500 |
| C  | -2.70376000 | 0.90500200  | -0.34124500 |
| C  | -1.69390300 | 0.09249800  | 0.16251300  |
| H  | -1.32175500 | -1.64844300 | 1.40252600  |
| H  | -3.69816100 | -2.21402000 | 1.70175100  |
| H  | -4.80310900 | 1.26157100  | -0.55814700 |

|    |             |             |             |
|----|-------------|-------------|-------------|
| H  | -2.45605600 | 1.80557300  | -0.89715400 |
| O  | -5.68484100 | -0.93722500 | 0.80856600  |
| C  | -6.71724700 | -0.10955400 | 0.33811700  |
| H  | -6.70376400 | -0.02101900 | -0.75825600 |
| H  | -7.65604500 | -0.57660200 | 0.64352600  |
| H  | -6.66158100 | 0.89893000  | 0.77299800  |
| Cl | -0.35456300 | 2.04018800  | 2.08682200  |

### Zn-Ar

G(Gibbs Free Energy) = -1339.356205 hartree

E(electronic Energy) = -1339.4266251 hartree

|    |             |             |             |
|----|-------------|-------------|-------------|
| C  | -2.66738000 | 0.97121500  | 0.00035600  |
| C  | -1.27423100 | 1.03255500  | 0.00033900  |
| C  | -0.48103200 | -0.11783000 | -0.00024800 |
| C  | -1.14301900 | -1.35675800 | -0.00076300 |
| C  | -2.52535300 | -1.44045500 | -0.00075100 |
| C  | -3.29467700 | -0.27377700 | -0.00014400 |
| H  | -3.24570900 | 1.89098700  | 0.00076200  |
| H  | -0.80777200 | 2.01882900  | 0.00066200  |
| H  | -0.56905300 | -2.28423900 | -0.00119700 |
| H  | -3.04252600 | -2.39716400 | -0.00116400 |
| Zn | 1.49221600  | 0.00134300  | 0.00000200  |
| Cl | 2.95909600  | 1.87712900  | -0.00046000 |
| Cl | 3.20058800  | -1.65372500 | 0.00059800  |
| Li | 4.47281700  | 0.20728600  | 0.00036500  |
| O  | -4.63965600 | -0.45642000 | -0.00028200 |
| C  | -5.45564200 | 0.68766100  | 0.00068400  |
| H  | -6.48862700 | 0.33375100  | 0.00100700  |
| H  | -5.29074100 | 1.30727000  | -0.89265000 |
| H  | -5.28987300 | 1.30625000  | 0.89449700  |

### ZnCl<sub>2</sub>·LiCl

G(Gibbs Free Energy) = -1453.757468 hartree

E(electronic Energy) = -1453.7200586 hartree

|    |             |             |             |
|----|-------------|-------------|-------------|
| Zn | -0.28278500 | -0.00153700 | -0.00217700 |
| Cl | 1.23905000  | -1.75372300 | 0.00040800  |
| Cl | 1.23211400  | 1.75744000  | 0.00040300  |
| Li | 2.68620100  | 0.00481700  | 0.00588100  |
| Cl | -2.44616700 | -0.00185400 | 0.00199300  |

### <sup>s</sup>Ni<sup>0</sup>

G(Gibbs Free Energy) = -664.213852 hartree

E(electronic Energy) = -664.3245165 hartree

|    |             |             |             |
|----|-------------|-------------|-------------|
| C  | -0.73247600 | 0.70292800  | 0.03045300  |
| C  | -1.50018500 | 1.82515200  | -0.26464900 |
| C  | -2.88461300 | 1.73049200  | -0.28063900 |
| C  | -3.46716100 | 0.49268900  | -0.01029600 |
| C  | -2.65113600 | -0.58012000 | 0.30070200  |
| N  | -1.30344400 | -0.50052900 | 0.34781400  |
| H  | -3.49607700 | 2.59581200  | -0.52014900 |
| H  | -1.00563300 | 2.75837700  | -0.52338000 |
| H  | -4.54611200 | 0.36550500  | -0.01165100 |
| H  | -3.07415500 | -1.54568400 | 0.56800000  |
| C  | 0.73253100  | 0.70285600  | -0.02999000 |
| C  | 1.50042400  | 1.82496900  | 0.26517100  |
| C  | 2.65105600  | -0.58020700 | -0.30135200 |
| C  | 2.88483000  | 1.73021900  | 0.28051800  |
| H  | 1.00603800  | 2.75814200  | 0.52440900  |
| H  | 3.07386700  | -1.54577300 | -0.56897400 |
| H  | 3.49645500  | 2.59542700  | 0.52003600  |
| C  | 3.46726600  | 0.49249400  | 0.00948700  |
| H  | 4.54622300  | 0.36537300  | 0.01025500  |
| N  | 1.30335800  | -0.50051700 | -0.34778500 |
| Ni | -0.00011500 | -1.83531000 | 0.00017200  |

**S1<sub>a</sub>** Ni

G(Gibbs Free Energy) = -1355.847287 hartree

E(electronic Energy) = -1356.037031 hartree

|    |             |             |             |
|----|-------------|-------------|-------------|
| C  | -3.08528500 | -0.59045400 | -1.91530100 |
| C  | -2.82407800 | 0.46680900  | -1.08707000 |
| C  | -2.33204200 | 0.24374500  | 0.23987000  |
| C  | -2.17352400 | -1.12155000 | 0.71173300  |
| C  | -2.55978800 | -2.18089600 | -0.17297400 |
| C  | -2.96719900 | -1.93056500 | -1.45445300 |
| H  | -3.41944200 | -0.40093100 | -2.93341800 |
| H  | -2.98484100 | 1.49182900  | -1.41802800 |
| H  | -2.17233500 | -1.31779600 | 1.78593400  |
| H  | -2.55252900 | -3.20352100 | 0.20479800  |
| H  | -3.24293100 | -2.75053400 | -2.11359300 |
| Cl | -2.70908400 | 1.56184900  | 1.43856800  |
| C  | 2.03624200  | 0.93351000  | -0.16853600 |
| C  | 3.03687700  | 1.87620600  | -0.38835200 |
| C  | 2.68512600  | 3.21119400  | -0.53461400 |
| C  | 1.34520200  | 3.56994300  | -0.45190000 |
| C  | 0.40392400  | 2.57411500  | -0.22811700 |
| N  | 0.73648600  | 1.28746700  | -0.09463200 |
| H  | 3.45100800  | 3.96278200  | -0.70634400 |

|    |             |             |             |
|----|-------------|-------------|-------------|
| H  | 4.07988000  | 1.57648500  | -0.43899800 |
| H  | 1.02859700  | 4.60323100  | -0.55581100 |
| H  | -0.65915100 | 2.79586500  | -0.13849800 |
| C  | 2.28611800  | -0.51075800 | 0.00717900  |
| C  | 3.54190100  | -1.10181600 | -0.10539200 |
| C  | 1.30801100  | -2.56043400 | 0.45034000  |
| C  | 3.66315100  | -2.47262800 | 0.07478100  |
| H  | 4.41685800  | -0.50162500 | -0.33835600 |
| H  | 0.38299500  | -3.09399900 | 0.66106900  |
| H  | 4.63494800  | -2.95164700 | -0.00918300 |
| C  | 2.52585400  | -3.21944500 | 0.35762500  |
| H  | 2.57579500  | -4.29425900 | 0.50263500  |
| N  | 1.18451700  | -1.24067900 | 0.28420000  |
| Ni | -0.50980000 | -0.21131000 | 0.27522300  |

### **STSI<sub>a</sub><sup>Ni</sup>**

G(Gibbs Free Energy) = -1355.823629 hartree

E(electronic Energy) = -1356.0136291 hartree

|    |             |             |             |
|----|-------------|-------------|-------------|
| C  | -3.79783700 | -0.82646200 | -0.23088900 |
| C  | -3.01337800 | 0.05826000  | -0.93930300 |
| C  | -2.12748400 | 0.89637100  | -0.22075500 |
| C  | -2.18125700 | 0.97019400  | 1.19591100  |
| C  | -2.96587400 | 0.02498600  | 1.87267200  |
| C  | -3.75731200 | -0.87246900 | 1.17591300  |
| H  | -4.45239700 | -1.50778800 | -0.77231100 |
| H  | -3.02514300 | 0.09442700  | -2.02594000 |
| H  | -1.70876000 | 1.79094200  | 1.72867800  |
| H  | -2.98788500 | 0.03703500  | 2.96091200  |
| H  | -4.38726800 | -1.57705400 | 1.71252000  |
| Cl | -1.50755900 | 2.49538500  | -1.07450200 |
| C  | 1.59643800  | -1.41828500 | -0.11249300 |
| C  | 2.12003400  | -2.69822000 | 0.06301800  |
| C  | 1.29162500  | -3.79707300 | -0.10608200 |
| C  | -0.04427000 | -3.58411200 | -0.43579200 |
| C  | -0.49553800 | -2.28175300 | -0.58234800 |
| N  | 0.29836900  | -1.21309400 | -0.43750400 |
| H  | 1.67772800  | -4.80360500 | 0.03114500  |
| H  | 3.15857400  | -2.82907600 | 0.35615100  |
| H  | -0.72949500 | -4.41459000 | -0.57872700 |
| H  | -1.53370400 | -2.06191700 | -0.83172500 |
| C  | 2.37851200  | -0.19215800 | 0.07686000  |
| C  | 3.77186100  | -0.14465700 | 0.03808700  |
| C  | 2.26815400  | 2.09366200  | 0.43576800  |
| C  | 4.41514000  | 1.06926000  | 0.21556900  |

|    |             |             |             |
|----|-------------|-------------|-------------|
| H  | 4.34267900  | -1.04889400 | -0.15585700 |
| H  | 1.62372700  | 2.95863800  | 0.58428100  |
| H  | 5.49976600  | 1.12693300  | 0.18400600  |
| C  | 3.64668600  | 2.21460300  | 0.41664900  |
| H  | 4.10791300  | 3.18731700  | 0.55827000  |
| N  | 1.63465700  | 0.92132900  | 0.27797800  |
| Ni | -0.29005100 | 0.69984100  | -0.05517400 |

**S<sub>2</sub>** Ni

G(Gibbs Free Energy) = -1355.885425 hartree

E(electronic Energy) = -1356.0769979 hartree

|    |             |             |             |
|----|-------------|-------------|-------------|
| C  | 4.07800000  | -0.01082700 | -1.20225900 |
| C  | 2.72452100  | -0.34503200 | -1.20307400 |
| C  | 2.03351800  | -0.49284100 | 0.00003500  |
| C  | 2.72393100  | -0.34466500 | 1.20343700  |
| C  | 4.07742100  | -0.01048200 | 1.20318800  |
| C  | 4.75609600  | 0.16545100  | 0.00060600  |
| H  | 4.60667800  | 0.10760700  | -2.14696900 |
| H  | 2.20518200  | -0.49075500 | -2.15032600 |
| H  | 2.20413500  | -0.49004000 | 2.15049300  |
| H  | 4.60563600  | 0.10821800  | 2.14812400  |
| H  | 5.81240500  | 0.42596000  | 0.00082100  |
| Cl | 0.50167400  | -2.85033200 | -0.00047500 |
| C  | -1.49442800 | 1.53333400  | -0.00005600 |
| C  | -1.90703800 | 2.86165500  | -0.00013500 |
| C  | -0.95566500 | 3.87088400  | -0.00031300 |
| C  | 0.38684800  | 3.52198900  | -0.00041600 |
| C  | 0.73085900  | 2.17769300  | -0.00032600 |
| N  | -0.18205300 | 1.19716900  | -0.00014000 |
| H  | -1.26152700 | 4.91352200  | -0.00037600 |
| H  | -2.96486100 | 3.10572200  | -0.00007900 |
| H  | 1.16938800  | 4.27396700  | -0.00057000 |
| H  | 1.76958200  | 1.85631000  | -0.00039600 |
| C  | -2.42850400 | 0.39662300  | 0.00009400  |
| C  | -3.81478500 | 0.51848800  | 0.00037700  |
| C  | -2.56902400 | -1.91564600 | 0.00005200  |
| C  | -4.58674500 | -0.63564200 | 0.00050100  |
| H  | -4.28991200 | 1.49488700  | 0.00052600  |
| H  | -1.99711400 | -2.84418500 | -0.00008500 |
| H  | -5.67128900 | -0.56516100 | 0.00073000  |
| C  | -3.95787800 | -1.87315200 | 0.00033600  |
| H  | -4.52783200 | -2.79691300 | 0.00044000  |
| N  | -1.82827100 | -0.80711200 | -0.00006600 |
| Ni | 0.18216300  | -0.71003100 | -0.00018200 |

**S1<sub>b</sub>** Ni

G(Gibbs Free Energy) = -1971.294021 hartree

E(electronic Energy) = -1971.5293125 hartree

|    |             |             |             |
|----|-------------|-------------|-------------|
| C  | -2.14376700 | -1.88804300 | 0.86660700  |
| C  | -2.62303100 | -2.86436000 | 1.73473200  |
| C  | -1.97423600 | -3.06890400 | 2.94473100  |
| C  | -0.87122000 | -2.28629300 | 3.25638300  |
| C  | -0.45001400 | -1.33327500 | 2.33768700  |
| N  | -1.06215800 | -1.13879000 | 1.16645300  |
| H  | -2.33236700 | -3.82633500 | 3.63689900  |
| H  | -3.50166400 | -3.44927100 | 1.47818700  |
| H  | -0.33501300 | -2.40898400 | 4.19222300  |
| H  | 0.41986900  | -0.70921400 | 2.52421400  |
| C  | -2.78749200 | -1.55853000 | -0.41987700 |
| C  | -3.82482100 | -2.29852800 | -0.98107600 |
| C  | -2.83779200 | -0.05991300 | -2.18042500 |
| C  | -4.37664100 | -1.88325300 | -2.18473200 |
| H  | -4.19174600 | -3.19581100 | -0.49110100 |
| H  | -2.40786400 | 0.84031900  | -2.61595500 |
| H  | -5.18464700 | -2.44931700 | -2.64035900 |
| C  | -3.88010900 | -0.73860900 | -2.79619900 |
| H  | -4.28698000 | -0.37582400 | -3.73508100 |
| N  | -2.29819700 | -0.45759000 | -1.02553700 |
| Ni | -0.63221300 | 0.25048500  | -0.20617800 |
| C  | 1.04026400  | 2.14550900  | 1.09354000  |
| C  | 0.21352300  | 3.22068600  | 1.26239000  |
| C  | -0.67383800 | 3.61454100  | 0.21589500  |
| C  | -0.69398100 | 2.93542000  | -0.97457200 |
| C  | 0.08536900  | 1.74830800  | -1.17208400 |
| C  | 0.94262700  | 1.33038300  | -0.07660600 |
| H  | 1.78504300  | 1.88545000  | 1.84394800  |
| H  | 0.26931100  | 3.79372400  | 2.18299900  |
| H  | -1.29834800 | 3.34074700  | -1.78415800 |
| H  | 0.35283800  | 1.45955800  | -2.19185100 |
| O  | -1.49709400 | 4.70309800  | 0.31300200  |
| C  | -1.40585500 | 5.50272000  | 1.46033800  |
| H  | -0.39824300 | 5.92475600  | 1.59337600  |
| H  | -2.11348600 | 6.32418500  | 1.32464000  |
| H  | -1.67912200 | 4.95308500  | 2.37378700  |
| O  | 2.21449400  | 0.71730500  | -0.46997400 |
| S  | 2.38815000  | -0.82691500 | -0.14220400 |
| O  | 1.61217500  | -1.67889300 | -1.01990500 |
| O  | 2.41718800  | -1.06268400 | 1.28986200  |



|   |            |             |             |
|---|------------|-------------|-------------|
| C | 4.13175800 | -0.91469500 | -0.73288500 |
| F | 4.89956300 | -0.10889400 | -0.02417300 |
| F | 4.19895000 | -0.58954900 | -2.00961500 |
| F | 4.53680800 | -2.16432700 | -0.57253400 |

**<sup>S</sup>TS1<sub>b</sub><sup>Ni</sup>**

G(Gibbs Free Energy) = -1971.279431 hartree

E(electronic Energy) = -1971.5137906 hartree

|    |             |             |             |
|----|-------------|-------------|-------------|
| C  | 2.98087400  | -0.76485700 | -0.63827100 |
| C  | 3.87016600  | -1.69173600 | -1.16970800 |
| C  | 3.40511100  | -2.61325200 | -2.09994200 |
| C  | 2.06911800  | -2.58563000 | -2.47233800 |
| C  | 1.23966500  | -1.62676700 | -1.90418200 |
| N  | 1.68602700  | -0.73833300 | -1.01381000 |
| H  | 4.08203600  | -3.35191400 | -2.52053600 |
| H  | 4.90979300  | -1.70696400 | -0.85572900 |
| H  | 1.66091400  | -3.29925400 | -3.18031100 |
| H  | 0.17774900  | -1.57440500 | -2.13840500 |
| C  | 3.34614200  | 0.24768800  | 0.37197500  |
| C  | 4.63353200  | 0.42640500  | 0.86950900  |
| C  | 2.53953900  | 1.95866600  | 1.71093500  |
| C  | 4.85788600  | 1.40956800  | 1.82342500  |
| H  | 5.45349600  | -0.19283900 | 0.51808600  |
| H  | 1.66851500  | 2.54152400  | 2.00449800  |
| H  | 5.85612100  | 1.56227500  | 2.22468500  |
| C  | 3.79479600  | 2.19244400  | 2.25548300  |
| H  | 3.92967500  | 2.97124700  | 2.99927500  |
| N  | 2.31951200  | 1.01277700  | 0.79581200  |
| Ni | 0.58855200  | 0.57385100  | -0.05197600 |
| C  | -1.57952500 | 1.38223700  | -1.73886800 |
| C  | -1.95790200 | 2.70320800  | -1.64255900 |
| C  | -1.97082700 | 3.36480700  | -0.39097200 |
| C  | -1.60682100 | 2.69253100  | 0.75694200  |
| C  | -1.14585000 | 1.35365000  | 0.69142500  |
| C  | -1.10724400 | 0.73012000  | -0.58924200 |
| H  | -1.60356500 | 0.85547700  | -2.68969600 |
| H  | -2.24555500 | 3.23343200  | -2.54622200 |
| H  | -1.74199100 | 3.19250800  | 1.71379900  |
| H  | -1.10870500 | 0.75120500  | 1.59987400  |
| O  | -2.37136700 | 4.65900100  | -0.23291200 |
| C  | -2.87645700 | 5.33732400  | -1.35271900 |
| H  | -3.74759400 | 4.82417700  | -1.78619600 |
| H  | -3.18694700 | 6.32483100  | -1.00427100 |

|   |             |             |             |
|---|-------------|-------------|-------------|
| H | -2.11588700 | 5.46510700  | -2.13747900 |
| O | -1.84384000 | -1.04824800 | -0.77872700 |
| S | -1.42789000 | -2.11813500 | 0.21409800  |
| O | -0.52961900 | -1.62076200 | 1.25949900  |
| O | -1.08701000 | -3.37502400 | -0.43865200 |
| C | -3.01415100 | -2.41818400 | 1.09132400  |
| F | -3.94503300 | -2.82834200 | 0.24346000  |
| F | -3.42332100 | -1.29528900 | 1.67075200  |
| F | -2.83983100 | -3.34350400 | 2.02438900  |

**S<sub>2</sub><sup>b</sup>Ni**

G(Gibbs Free Energy) = -1971.338375 hartree

E(electronic Energy) = -1971.5757308 hartree

|    |             |             |             |
|----|-------------|-------------|-------------|
| C  | 2.91186400  | -1.74211700 | 0.11133500  |
| C  | 3.69625100  | -2.86170000 | 0.36362300  |
| C  | 3.08875000  | -4.09835000 | 0.52615900  |
| C  | 1.70828600  | -4.18398900 | 0.42651300  |
| C  | 0.98128900  | -3.02881100 | 0.17658400  |
| N  | 1.56113000  | -1.83031700 | 0.02831800  |
| H  | 3.68936000  | -4.98204000 | 0.72333600  |
| H  | 4.77583100  | -2.76780600 | 0.42716000  |
| H  | 1.18729100  | -5.12907700 | 0.54002500  |
| H  | -0.10223200 | -3.03934700 | 0.09741700  |
| C  | 3.46606300  | -0.39553800 | -0.10382700 |
| C  | 4.81742300  | -0.07863300 | -0.02582400 |
| C  | 2.91524900  | 1.79385000  | -0.63260600 |
| C  | 5.20971000  | 1.23273400  | -0.26580100 |
| H  | 5.55602900  | -0.83476800 | 0.22262100  |
| H  | 2.11556900  | 2.49812200  | -0.85582200 |
| H  | 6.25992500  | 1.50566700  | -0.20742100 |
| C  | 4.24873000  | 2.18401500  | -0.57561200 |
| H  | 4.51511300  | 3.21865600  | -0.76522100 |
| N  | 2.54124600  | 0.53500100  | -0.40058900 |
| Ni | 0.66399300  | -0.16914600 | -0.31731400 |
| C  | -1.84181200 | -1.08268300 | -1.28965200 |
| C  | -3.12799500 | -1.62048000 | -1.18665200 |
| C  | -3.63897700 | -1.93876700 | 0.07026300  |
| C  | -2.86465200 | -1.71650300 | 1.21181900  |
| C  | -1.58730900 | -1.18658300 | 1.09388800  |
| C  | -1.05784500 | -0.87608900 | -0.16207100 |
| H  | -1.46550100 | -0.80974800 | -2.27549300 |
| H  | -3.71835100 | -1.77191400 | -2.08639000 |
| H  | -3.29620400 | -1.95653200 | 2.18109700  |
| H  | -1.00323300 | -0.99808600 | 1.99489700  |

|   |             |             |             |
|---|-------------|-------------|-------------|
| O | -4.87532200 | -2.46720100 | 0.28930100  |
| C | -5.70529200 | -2.65893000 | -0.82553000 |
| H | -5.27135500 | -3.37169300 | -1.54301300 |
| H | -6.64654200 | -3.06579000 | -0.44929800 |
| H | -5.90938500 | -1.71437200 | -1.35086200 |
| O | -0.14769500 | 1.88924900  | 1.68034100  |
| S | -0.34436700 | 2.48975700  | 0.36555600  |
| O | -0.07203000 | 1.51377100  | -0.77282300 |
| O | 0.25645300  | 3.78905200  | 0.08945700  |
| C | -2.15591700 | 2.75603500  | 0.19091900  |
| F | -2.54839400 | 3.65576500  | 1.08279900  |
| F | -2.81598700 | 1.62821800  | 0.39565200  |
| F | -2.43106600 | 3.20514700  | -1.02540700 |

### **T<sub>1</sub>Ni0**

G(Gibbs Free Energy) = -664.234759 hartree

E(electronic Energy) = -664.3444118 hartree

|    |             |             |             |
|----|-------------|-------------|-------------|
| C  | -0.71469500 | 0.70099600  | 0.00008900  |
| C  | -1.51100100 | 1.87251200  | -0.00015100 |
| C  | -2.87811100 | 1.78972800  | -0.00011000 |
| C  | -3.50181800 | 0.51914600  | 0.00012800  |
| C  | -2.69167700 | -0.59082000 | 0.00012300  |
| N  | -1.34830100 | -0.53358100 | 0.00009000  |
| H  | -3.47828400 | 2.69612800  | -0.00027200 |
| H  | -1.02931700 | 2.84640000  | -0.00044000 |
| H  | -4.58132600 | 0.41150600  | 0.00022800  |
| H  | -3.12069700 | -1.59244000 | 0.00017200  |
| C  | 0.71448600  | 0.70116000  | 0.00016600  |
| C  | 1.51076100  | 1.87271000  | 0.00003800  |
| C  | 2.69159100  | -0.59062700 | 0.00018500  |
| C  | 2.87787400  | 1.78990900  | -0.00011700 |
| H  | 1.02912800  | 2.84662500  | 0.00014300  |
| H  | 3.12054400  | -1.59227300 | 0.00036800  |
| H  | 3.47801400  | 2.69633300  | -0.00021700 |
| C  | 3.50169600  | 0.51936600  | -0.00011600 |
| H  | 4.58121900  | 0.41188700  | -0.00018000 |
| N  | 1.34822100  | -0.53327500 | 0.00037400  |
| Ni | 0.00023700  | -1.88430900 | -0.00015900 |

### **T<sub>1a</sub>Ni**

G(Gibbs Free Energy) = -1355.830665 hartree

E(electronic Energy) = -1356.017645 hartree

|   |             |            |            |
|---|-------------|------------|------------|
| C | -3.35999000 | 1.03549200 | 1.07284300 |
|---|-------------|------------|------------|

|    |             |             |             |
|----|-------------|-------------|-------------|
| C  | -2.83842300 | -0.22885900 | 1.26312800  |
| C  | -2.37220900 | -0.95009100 | 0.14671200  |
| C  | -2.41378700 | -0.39587600 | -1.15326500 |
| C  | -2.96076700 | 0.89333800  | -1.30728600 |
| C  | -3.43768200 | 1.59109300  | -0.21526800 |
| H  | -3.71814700 | 1.59902100  | 1.93010400  |
| H  | -2.79460600 | -0.68657800 | 2.24721300  |
| H  | -2.19036500 | -1.01423300 | -2.01966500 |
| H  | -3.02068900 | 1.32218400  | -2.30418200 |
| H  | -3.87111000 | 2.57866600  | -0.35066700 |
| Cl | -2.03401300 | -2.68240000 | 0.32446900  |
| C  | 2.34812500  | -0.13588200 | 0.02093900  |
| C  | 3.70701900  | -0.51154100 | 0.11967900  |
| C  | 4.06557100  | -1.83381300 | 0.07363300  |
| C  | 3.06183200  | -2.82109400 | -0.07113300 |
| C  | 1.75602800  | -2.40290400 | -0.16268700 |
| N  | 1.38178300  | -1.11100900 | -0.12286200 |
| H  | 5.11163400  | -2.11983600 | 0.14942800  |
| H  | 4.46824800  | 0.25610900  | 0.23357100  |
| H  | 3.30320300  | -3.87835800 | -0.10919700 |
| H  | 0.94407000  | -3.12233100 | -0.27288700 |
| C  | 1.86245100  | 1.20422400  | 0.05381800  |
| C  | 2.67815300  | 2.35042600  | 0.18642200  |
| C  | -0.03042300 | 2.58341000  | -0.03763100 |
| C  | 2.11841300  | 3.60177200  | 0.20885100  |
| H  | 3.75555400  | 2.23324200  | 0.27107800  |
| H  | -1.11462700 | 2.63407500  | -0.13405300 |
| H  | 2.74798200  | 4.48190900  | 0.31326700  |
| C  | 0.71571500  | 3.73171500  | 0.09209300  |
| H  | 0.23037100  | 4.70251500  | 0.10049600  |
| N  | 0.49219300  | 1.34565800  | -0.05629500 |
| Ni | -0.42111800 | -0.40344900 | -0.21648100 |

**TTS1<sub>a</sub><sup>Ni</sup>**

G(Gibbs Free Energy) = -1355.817272 hartree

E(electronic Energy) = -1356.0030793 hartree

|   |            |             |             |
|---|------------|-------------|-------------|
| C | 3.67737800 | 0.25346000  | -1.53370100 |
| C | 2.63131100 | -0.64297100 | -1.39229300 |
| C | 2.13482800 | -0.88800500 | -0.10503800 |
| C | 2.76094900 | -0.36853100 | 1.03694900  |
| C | 3.81204800 | 0.53262700  | 0.86647100  |
| C | 4.26699300 | 0.84646100  | -0.41002500 |
| H | 4.04085200 | 0.50060500  | -2.52904500 |
| H | 2.16830000 | -1.11985100 | -2.25284500 |

|    |             |             |             |
|----|-------------|-------------|-------------|
| H  | 2.42196600  | -0.66102300 | 2.02892200  |
| H  | 4.28856900  | 0.97195500  | 1.74061600  |
| H  | 5.09895500  | 1.53443000  | -0.53627300 |
| Cl | 1.24979800  | -2.75861300 | 0.25201900  |
| C  | -2.42949000 | 0.20044600  | -0.06728500 |
| C  | -3.82178100 | 0.11844300  | -0.22462200 |
| C  | -4.43049100 | -1.11636600 | -0.28580600 |
| C  | -3.64500200 | -2.27564100 | -0.18203100 |
| C  | -2.28093600 | -2.13034900 | -0.03195600 |
| N  | -1.67434300 | -0.93542900 | 0.01472400  |
| H  | -5.50844200 | -1.18921000 | -0.40428400 |
| H  | -4.41621300 | 1.02648900  | -0.28174800 |
| H  | -4.08722000 | -3.26592300 | -0.22201900 |
| H  | -1.61915800 | -2.99213500 | 0.04601600  |
| C  | -1.68393100 | 1.43430100  | 0.02311300  |
| C  | -2.21982300 | 2.71200000  | -0.20214900 |
| C  | 0.42312700  | 2.37549900  | 0.40436200  |
| C  | -1.41179500 | 3.82286100  | -0.09970100 |
| H  | -3.26729100 | 2.81953300  | -0.47152100 |
| H  | 1.47299800  | 2.18316200  | 0.62965400  |
| H  | -1.82051700 | 4.81508300  | -0.27130700 |
| C  | -0.04993400 | 3.65513300  | 0.20899700  |
| H  | 0.62126000  | 4.50381900  | 0.29284800  |
| N  | -0.35878600 | 1.28597100  | 0.33334000  |
| Ni | 0.25680600  | -0.56644700 | 0.26708900  |

### T<sub>a</sub><sup>Ni</sup>

G(Gibbs Free Energy)=-1355.858617 hartree

E(electronic Energy)=-1356.0446843 hartree

|    |             |             |             |
|----|-------------|-------------|-------------|
| C  | -4.03579300 | 0.69969100  | 1.57472800  |
| C  | -2.68743800 | 0.50247100  | 1.27767500  |
| C  | -2.28276500 | -0.37098900 | 0.25889100  |
| C  | -3.27944200 | -1.02983400 | -0.46884900 |
| C  | -4.62769700 | -0.83469700 | -0.18108300 |
| C  | -5.00921000 | 0.02917600  | 0.84231700  |
| H  | -4.32577600 | 1.37827200  | 2.37601500  |
| H  | -1.94065200 | 1.04736500  | 1.86297300  |
| H  | -2.99003200 | -1.70183400 | -1.27652700 |
| H  | -5.38799900 | -1.35711800 | -0.75992500 |
| H  | -6.06341000 | 0.18222600  | 1.06551100  |
| Cl | -0.16202900 | -1.75000700 | -2.01197800 |
| C  | 2.43908100  | 0.08669400  | 0.36482900  |
| C  | 3.82180100  | -0.00316800 | 0.50649500  |
| C  | 4.38763600  | -1.23832000 | 0.79146200  |

|    |             |             |             |
|----|-------------|-------------|-------------|
| C  | 3.56712400  | -2.35186500 | 0.91394200  |
| C  | 2.19853100  | -2.18045900 | 0.75173200  |
| N  | 1.65264700  | -0.99272400 | 0.50145700  |
| H  | 5.46454800  | -1.33057100 | 0.90409600  |
| H  | 4.45367600  | 0.87082500  | 0.38060800  |
| H  | 3.97411700  | -3.33633300 | 1.12114400  |
| H  | 1.50682500  | -3.01902300 | 0.80868500  |
| C  | 1.73390700  | 1.34114800  | 0.01947300  |
| C  | 2.36252400  | 2.57846100  | -0.09126800 |
| C  | -0.31099300 | 2.27406300  | -0.56351300 |
| C  | 1.60907600  | 3.68493700  | -0.46064900 |
| H  | 3.42481500  | 2.68242300  | 0.10767600  |
| H  | -1.37062000 | 2.08153900  | -0.72455500 |
| H  | 2.08364700  | 4.65805500  | -0.55508100 |
| C  | 0.25094900  | 3.53608500  | -0.70764300 |
| H  | -0.36732000 | 4.37708100  | -1.00436800 |
| N  | 0.41516800  | 1.21546300  | -0.20707100 |
| Ni | -0.39306300 | -0.66722600 | -0.04052100 |

### T<sub>1b</sub>Ni

G(Gibbs Free Energy) = -1971.277379 hartree

E(electronic Energy) = -1971.5117651 hartree

|    |             |             |             |
|----|-------------|-------------|-------------|
| C  | 2.21271400  | 1.95109700  | -0.02621900 |
| C  | 2.93233100  | 2.96891700  | 0.64895200  |
| C  | 2.26943400  | 4.02674400  | 1.21430800  |
| C  | 0.86077700  | 4.09916600  | 1.11985800  |
| C  | 0.21035700  | 3.08434100  | 0.45030600  |
| N  | 0.83575200  | 2.03808500  | -0.10923000 |
| H  | 2.82612300  | 4.80504500  | 1.73118500  |
| H  | 4.01558900  | 2.90582300  | 0.71753100  |
| H  | 0.29968900  | 4.92133100  | 1.55186800  |
| H  | -0.87612800 | 3.09110900  | 0.34843500  |
| C  | 2.80449200  | 0.81304600  | -0.64523100 |
| C  | 4.19785900  | 0.55341300  | -0.69818200 |
| C  | 2.41720300  | -1.18551800 | -1.82357100 |
| C  | 4.67284000  | -0.57549600 | -1.31395200 |
| H  | 4.89144200  | 1.26427000  | -0.25545500 |
| H  | 1.67268800  | -1.85580000 | -2.25581700 |
| H  | 5.74322100  | -0.76362200 | -1.35834700 |
| C  | 3.75956300  | -1.49134100 | -1.89353800 |
| H  | 4.09217600  | -2.39986900 | -2.38456200 |
| N  | 1.92658700  | -0.08439300 | -1.23532400 |
| Ni | 0.08154200  | 0.45721100  | -1.00932600 |
| C  | -0.03366000 | -0.65838100 | 1.76155900  |

|   |             |             |             |
|---|-------------|-------------|-------------|
| C | 1.19364400  | -1.31143300 | 1.74847500  |
| C | 1.31222100  | -2.54517200 | 1.10306900  |
| C | 0.19283500  | -3.13529000 | 0.49939900  |
| C | -1.03181600 | -2.49298500 | 0.51997500  |
| C | -1.11967800 | -1.26114000 | 1.15301300  |
| H | -0.14602400 | 0.31664000  | 2.22997500  |
| H | 2.05420300  | -0.82494100 | 2.19576100  |
| H | 0.31952600  | -4.09826800 | 0.01307100  |
| H | -1.91274400 | -2.92693800 | 0.05396700  |
| O | 2.45651500  | -3.24675900 | 1.00672900  |
| C | 3.63954800  | -2.65812100 | 1.50734100  |
| H | 3.58223700  | -2.50956800 | 2.59469500  |
| H | 4.44552200  | -3.35974300 | 1.28539000  |
| H | 3.85237300  | -1.70094400 | 1.01060700  |
| O | -2.37856800 | -0.61071300 | 1.20945600  |
| S | -2.78666900 | 0.41417800  | 0.04505200  |
| O | -1.95501700 | 0.22210400  | -1.14693300 |
| O | -3.01844900 | 1.72636200  | 0.59073900  |
| C | -4.41452700 | -0.34001900 | -0.39109300 |
| F | -5.19811100 | -0.31385900 | 0.66391500  |
| F | -4.22023400 | -1.58336600 | -0.78529000 |
| F | -4.93558900 | 0.36966500  | -1.36894300 |

### **TTS1<sub>b</sub>Ni**

G(Gibbs Free Energy) = -1971.262154 hartree

E(electronic Energy) = -1971.494216 hartree

|   |             |             |             |
|---|-------------|-------------|-------------|
| C | -2.10277900 | -2.60171500 | 0.01466700  |
| C | -2.58807600 | -3.88782400 | 0.27490300  |
| C | -1.69839900 | -4.93456600 | 0.42353200  |
| C | -0.32830900 | -4.68143200 | 0.31503100  |
| C | 0.08573200  | -3.38577100 | 0.06801900  |
| N | -0.76946500 | -2.36363700 | -0.08098800 |
| H | -2.06272400 | -5.93860500 | 0.62400800  |
| H | -3.65652300 | -4.06445800 | 0.35994700  |
| H | 0.40552800  | -5.47345800 | 0.42526400  |
| H | 1.13975200  | -3.12986700 | -0.01422800 |
| C | -2.95375400 | -1.43083700 | -0.16943100 |
| C | -4.35190500 | -1.46722000 | -0.12803000 |
| C | -3.00016000 | 0.85355600  | -0.59407600 |
| C | -5.07158200 | -0.30507600 | -0.32996700 |
| H | -4.87015500 | -2.40346700 | 0.05826100  |
| H | -2.41603600 | 1.75395800  | -0.77988800 |
| H | -6.15787100 | -0.32194800 | -0.30133600 |
| C | -4.38248600 | 0.88608200  | -0.57444300 |

|    |             |             |             |
|----|-------------|-------------|-------------|
| H  | -4.90653600 | 1.82041100  | -0.75006800 |
| N  | -2.29235700 | -0.26555700 | -0.39259900 |
| Ni | -0.28662900 | -0.42531000 | -0.23515100 |
| C  | -0.04420700 | 1.92698600  | 1.51740800  |
| C  | -0.78422600 | 3.06729100  | 1.29822800  |
| C  | -0.85087700 | 3.63403500  | 0.00867200  |
| C  | -0.14673200 | 3.04458200  | -1.04598000 |
| C  | 0.60078000  | 1.89654900  | -0.84232400 |
| C  | 0.59154600  | 1.25037300  | 0.43588300  |
| H  | 0.03551400  | 1.50501300  | 2.51641900  |
| H  | -1.31159500 | 3.52299400  | 2.13181200  |
| H  | -0.19415700 | 3.51832400  | -2.02400800 |
| H  | 1.18946900  | 1.47405600  | -1.65395100 |
| O  | -1.56753800 | 4.74821100  | -0.30284600 |
| C  | -2.26079700 | 5.39364100  | 0.73423800  |
| H  | -1.58227100 | 5.74123000  | 1.52667800  |
| H  | -2.75539900 | 6.25866000  | 0.28757900  |
| H  | -3.02366100 | 4.74100300  | 1.18495900  |
| O  | 2.10928100  | 0.85372000  | 0.93286900  |
| S  | 2.67234600  | -0.47840900 | 0.39032700  |
| O  | 1.84106300  | -0.97172700 | -0.72013500 |
| O  | 3.06775800  | -1.40652400 | 1.42792400  |
| C  | 4.21529700  | 0.11962700  | -0.41768200 |
| F  | 5.00160700  | 0.68166400  | 0.47998500  |
| F  | 3.91107500  | 0.99999600  | -1.35606400 |
| F  | 4.83049400  | -0.91447900 | -0.96522700 |

## T<sub>2</sub><sup>Ni</sup>

G(Gibbs Free Energy) = -1971.316216 hartree

E(electronic Energy) = -1971.5480835 hartree

|   |             |             |             |
|---|-------------|-------------|-------------|
| C | -3.07660400 | 1.30114900  | -0.30062100 |
| C | -4.45429800 | 1.42358800  | -0.45697900 |
| C | -5.13127400 | 0.47779400  | -1.21526300 |
| C | -4.42120500 | -0.56659000 | -1.78918000 |
| C | -3.04786300 | -0.62184500 | -1.58757400 |
| N | -2.39442500 | 0.29569000  | -0.87233500 |
| H | -6.20709000 | 0.55511600  | -1.34824800 |
| H | -4.99680700 | 2.24211000  | 0.00591200  |
| H | -4.91442500 | -1.33502700 | -2.37529600 |
| H | -2.43789100 | -1.43141600 | -1.98147500 |
| C | -2.26011100 | 2.23541400  | 0.50201200  |
| C | -2.79838500 | 3.29217900  | 1.23234300  |
| C | -0.12335900 | 2.76668700  | 1.20653800  |
| C | -1.94666500 | 4.09911800  | 1.97382100  |



|    |             |             |             |
|----|-------------|-------------|-------------|
| H  | -3.86754900 | 3.48042600  | 1.23428000  |
| H  | 0.93399400  | 2.51257800  | 1.14855900  |
| H  | -2.34748500 | 4.92598700  | 2.55412800  |
| C  | -0.58442800 | 3.83453300  | 1.96632700  |
| H  | 0.11458200  | 4.43984200  | 2.53456100  |
| N  | -0.94032900 | 1.99061700  | 0.49608500  |
| Ni | -0.27015200 | 0.22295400  | -0.58211200 |
| C  | 2.39515100  | 0.46125800  | 0.38914300  |
| C  | 3.77045500  | 0.69272000  | 0.36027000  |
| C  | 4.33277400  | 1.30362700  | -0.76105100 |
| C  | 3.51809500  | 1.67627300  | -1.83570700 |
| C  | 2.15582400  | 1.42992400  | -1.78813700 |
| C  | 1.56131600  | 0.80218500  | -0.68209500 |
| H  | 1.96755700  | -0.01797600 | 1.27292100  |
| H  | 4.38634100  | 0.39388000  | 1.20416400  |
| H  | 3.98845300  | 2.15359600  | -2.69269900 |
| H  | 1.54548800  | 1.72982700  | -2.64065700 |
| O  | 5.65335800  | 1.58629000  | -0.90031200 |
| C  | 6.51727300  | 1.20932000  | 0.14213700  |
| H  | 6.49985000  | 0.12346600  | 0.31302600  |
| H  | 7.52279500  | 1.50512200  | -0.16413100 |
| H  | 6.26693200  | 1.71809800  | 1.08440800  |
| O  | -0.54233500 | -1.40101700 | 1.59493300  |
| S  | -0.71088800 | -2.37967800 | 0.51515900  |
| O  | -0.43138400 | -1.74193400 | -0.83508200 |
| O  | -1.89682000 | -3.22108500 | 0.51205400  |
| C  | 0.71763000  | -3.52379800 | 0.67436900  |
| F  | 0.64005000  | -4.16484200 | 1.83186300  |
| F  | 1.85339200  | -2.84081100 | 0.63479500  |
| F  | 0.70861300  | -4.40622200 | -0.31265600 |

### 3Ni<sup>+</sup>

G(Gibbs Free Energy) = -5015.203873 hartree

E(electronic Energy) = -5015.9530427 hartree

|   |            |             |            |
|---|------------|-------------|------------|
| C | 3.99278500 | 0.22503200  | 2.40353300 |
| C | 4.68989200 | 1.04573100  | 3.28694900 |
| C | 4.09739700 | 1.37797700  | 4.49611100 |
| C | 2.83251900 | 0.88635500  | 4.79327900 |
| C | 2.20394700 | 0.07084300  | 3.86244600 |
| N | 2.77247700 | -0.23937500 | 2.70097800 |
| H | 4.62470200 | 2.01160100  | 5.20420800 |
| H | 5.68200300 | 1.41208400  | 3.04332900 |
| H | 2.34198900 | 1.11665500  | 5.73366400 |
| H | 1.21867200 | -0.36015300 | 4.03304600 |

|    |             |             |             |
|----|-------------|-------------|-------------|
| C  | 4.52287100  | -0.21147600 | 1.09904100  |
| C  | 5.67803200  | 0.32090500  | 0.53381800  |
| C  | 4.19415100  | -1.57401500 | -0.75058200 |
| C  | 6.08669100  | -0.12111300 | -0.71601700 |
| H  | 6.23347600  | 1.09531600  | 1.05432300  |
| H  | 3.56613400  | -2.32300700 | -1.22781400 |
| H  | 6.98255000  | 0.29057200  | -1.17422100 |
| C  | 5.33205700  | -1.08177000 | -1.37438200 |
| H  | 5.60722800  | -1.44851900 | -2.35769700 |
| N  | 3.80429700  | -1.15451600 | 0.45540700  |
| Ni | 2.10714300  | -1.70634400 | 1.42358100  |
| C  | 0.97885000  | -2.57894600 | -0.98341700 |
| C  | 0.89724900  | -3.37684100 | -2.12977600 |
| C  | 1.47030400  | -4.64285400 | -2.14295900 |
| C  | 2.11857100  | -5.13071400 | -1.01370200 |
| C  | 2.22246400  | -4.35140300 | 0.14045700  |
| C  | 1.67238000  | -3.08254200 | 0.10266100  |
| H  | 0.50860900  | -1.59573700 | -0.99794700 |
| H  | 0.36075000  | -2.99015000 | -2.99578300 |
| H  | 2.55799500  | -6.12653600 | -1.01669300 |
| H  | 2.73745100  | -4.71588200 | 1.02276900  |
| O  | -0.80244100 | -0.24691300 | -2.38710600 |
| S  | -0.75292600 | -0.34688700 | -3.86598000 |
| O  | -1.43827300 | 0.75373400  | -4.55490800 |
| O  | -0.98101200 | -1.69528100 | -4.39434200 |
| C  | 1.03003400  | -0.03984800 | -4.23051200 |
| F  | 1.80674500  | -0.91084800 | -3.58028800 |
| F  | 1.39463600  | 1.18399800  | -3.83620900 |
| F  | 1.27303100  | -0.14867000 | -5.52829800 |
| P  | -1.91592600 | 2.24758300  | -0.50300900 |
| P  | -2.98862800 | -1.21719400 | 0.14756700  |
| C  | -3.17921500 | 2.06495900  | -1.84813000 |
| H  | -3.10606700 | 2.97606600  | -2.45559200 |
| H  | -2.80252600 | 1.25651000  | -2.48802700 |
| C  | -4.63419800 | 1.85679700  | -1.44145100 |
| H  | -5.20277000 | 1.71543400  | -2.37207200 |
| H  | -5.02302600 | 2.77662400  | -0.98300300 |
| C  | -4.32882800 | -0.64293100 | -0.98414500 |
| H  | -5.08952700 | -1.43010100 | -1.05061900 |
| H  | -3.89276400 | -0.54957200 | -1.98698900 |
| Pd | -1.08722900 | 0.28815700  | 0.47407500  |
| C  | 2.69330000  | 2.00907400  | -0.53575600 |
| C  | 1.49006600  | 1.30431600  | -0.50272000 |
| C  | 0.63410800  | 1.38530700  | 0.59437300  |

|    |             |             |             |
|----|-------------|-------------|-------------|
| C  | 1.00209400  | 2.18996700  | 1.67398900  |
| C  | 2.19943400  | 2.89716800  | 1.65518800  |
| C  | 3.04731500  | 2.80960200  | 0.54923500  |
| H  | 3.32210500  | 1.93579200  | -1.42079700 |
| H  | 1.20282300  | 0.71781800  | -1.37556300 |
| H  | 0.34758100  | 2.28248400  | 2.54235600  |
| H  | 2.49948500  | 3.53310200  | 2.48631900  |
| Cl | 2.92416900  | -3.17368900 | 2.98321800  |
| C  | -0.73066200 | 3.40567900  | -1.28352600 |
| C  | -0.09065600 | 4.39056300  | -0.52450300 |
| C  | -0.41509900 | 3.26735300  | -2.63747600 |
| C  | 0.85468700  | 5.22171200  | -1.11033900 |
| H  | -0.32243600 | 4.50195800  | 0.53291600  |
| C  | 0.53085000  | 4.10595600  | -3.21846000 |
| H  | -0.88612800 | 2.49938000  | -3.25071900 |
| C  | 1.16663000  | 5.08134900  | -2.46028800 |
| H  | 1.35161000  | 5.97886900  | -0.50732100 |
| H  | 0.77284700  | 3.97845800  | -4.27079800 |
| H  | 1.90566500  | 5.73510000  | -2.91918300 |
| C  | -2.73265000 | 3.27800800  | 0.77218300  |
| C  | -3.32903900 | 4.49621200  | 0.42750900  |
| C  | -2.78972100 | 2.84329200  | 2.09644900  |
| C  | -3.97964000 | 5.25541200  | 1.39132500  |
| H  | -3.27417300 | 4.85649700  | -0.59940700 |
| C  | -3.44077100 | 3.60443200  | 3.06261600  |
| H  | -2.31697400 | 1.89540200  | 2.35844800  |
| C  | -4.03794300 | 4.80870000  | 2.70930700  |
| H  | -4.44226200 | 6.19967900  | 1.11458600  |
| H  | -3.48195800 | 3.25344900  | 4.09100800  |
| H  | -4.54908300 | 5.40436800  | 3.46187100  |
| C  | -2.58490700 | -2.87993600 | -0.49110600 |
| C  | -2.30085000 | -3.93153200 | 0.38686300  |
| C  | -2.51358400 | -3.09973700 | -1.86944200 |
| C  | -1.98453300 | -5.18975300 | -0.11023200 |
| H  | -2.32738000 | -3.76705000 | 1.46240800  |
| C  | -2.20526000 | -4.36222800 | -2.36083300 |
| H  | -2.64728500 | -2.28582300 | -2.57798400 |
| C  | -1.94789900 | -5.40976800 | -1.48391400 |
| H  | -1.76183800 | -5.99960900 | 0.58033100  |
| H  | -2.14125200 | -4.50801400 | -3.43690000 |
| H  | -1.69671800 | -6.39537900 | -1.86999600 |
| C  | -3.93784600 | -1.56348300 | 1.68131000  |
| C  | -5.07357200 | -2.37997700 | 1.66253500  |
| C  | -3.54025500 | -0.98488200 | 2.88701600  |

|    |             |             |             |
|----|-------------|-------------|-------------|
| C  | -5.80063000 | -2.60185800 | 2.82428500  |
| H  | -5.38214700 | -2.86107700 | 0.73491200  |
| C  | -4.26822100 | -1.20665900 | 4.05260700  |
| H  | -2.63826100 | -0.37351700 | 2.90876500  |
| C  | -5.40005800 | -2.01175700 | 4.02072300  |
| H  | -6.68078100 | -3.24004400 | 2.79880800  |
| H  | -3.94469500 | -0.75497000 | 4.98743300  |
| H  | -5.96960200 | -2.18750800 | 4.93031800  |
| H  | 1.39084000  | -5.25990600 | -3.03562900 |
| O  | 4.20749700  | 3.52786000  | 0.62585500  |
| C  | 4.91140900  | 3.73455100  | -0.57391200 |
| H  | 5.70809200  | 4.44881700  | -0.35232100 |
| H  | 5.36488700  | 2.80558500  | -0.95461800 |
| H  | 4.25962500  | 4.14893100  | -1.35656200 |
| Cl | -0.12031900 | -1.51315500 | 1.96589800  |
| C  | -4.91401500 | 0.69024000  | -0.50377000 |
| H  | -5.99944100 | 0.59248200  | -0.37902300 |
| H  | -4.53933900 | 0.93955100  | 0.50183500  |

### TS3'

G(Gibbs Free Energy) = -5015.169948 hartree

E(electronic Energy) = -5015.9217627 hartree

|    |             |             |             |
|----|-------------|-------------|-------------|
| C  | -4.18038400 | 1.01298000  | 0.38408500  |
| C  | -4.78765400 | 2.02871800  | 1.12343500  |
| C  | -4.24505600 | 3.30511600  | 1.09736700  |
| C  | -3.11368200 | 3.54101200  | 0.32884300  |
| C  | -2.56051700 | 2.47565200  | -0.36993600 |
| N  | -3.06229900 | 1.24054700  | -0.32451000 |
| H  | -4.71578700 | 4.10917400  | 1.65836900  |
| H  | -5.69359400 | 1.83745300  | 1.68933800  |
| H  | -2.65254000 | 4.52335200  | 0.25571200  |
| H  | -1.68334300 | 2.60648500  | -0.99975600 |
| C  | -4.78001500 | -0.32937300 | 0.23635800  |
| C  | -5.94196700 | -0.70827400 | 0.90808500  |
| C  | -4.79683300 | -2.28298400 | -0.98402400 |
| C  | -6.53523800 | -1.92475100 | 0.60685100  |
| H  | -6.38922500 | -0.05666900 | 1.65184100  |
| H  | -4.32310900 | -2.86730900 | -1.76846800 |
| H  | -7.44060400 | -2.23499100 | 1.12169300  |
| C  | -5.96970900 | -2.71719700 | -0.38035700 |
| H  | -6.41878400 | -3.65734000 | -0.68429700 |
| N  | -4.18966300 | -1.14418900 | -0.65578000 |
| Ni | -2.37203700 | -0.33994900 | -1.55112200 |
| C  | -2.05000000 | -3.11397900 | -2.28504800 |

|    |             |             |             |
|----|-------------|-------------|-------------|
| C  | -1.72092000 | -4.19160200 | -3.11164100 |
| C  | -1.27561100 | -3.96640600 | -4.40617000 |
| C  | -1.15218900 | -2.66135400 | -4.87318300 |
| C  | -1.47667500 | -1.57726700 | -4.05975000 |
| C  | -1.92392400 | -1.82693900 | -2.77166300 |
| H  | -2.33894000 | -3.31065000 | -1.25484100 |
| H  | -1.79368200 | -5.20360200 | -2.71530800 |
| H  | -0.80206200 | -2.47300500 | -5.88575500 |
| H  | -1.38979100 | -0.56465400 | -4.43800400 |
| O  | 3.13475500  | -1.90397800 | -1.96875200 |
| S  | 3.96713400  | -1.41461600 | -0.86074300 |
| O  | 3.20231700  | -0.68239700 | 0.18310100  |
| O  | 5.24691700  | -0.80256500 | -1.20657100 |
| C  | 4.44148200  | -2.97626100 | -0.00199100 |
| F  | 5.25915000  | -3.70029300 | -0.75012800 |
| F  | 3.36009600  | -3.72084300 | 0.27148800  |
| F  | 5.04732500  | -2.71927700 | 1.16105800  |
| P  | 0.92411000  | 0.25993700  | 2.29072700  |
| P  | 1.87711900  | 2.55249700  | -0.40020600 |
| C  | 2.56079800  | 0.95770000  | 2.78699400  |
| H  | 2.81810500  | 0.52294100  | 3.76070700  |
| H  | 3.28147400  | 0.56497500  | 2.05835100  |
| C  | 2.54358400  | 2.48902700  | 2.83602900  |
| H  | 2.68087700  | 2.82198500  | 3.87271200  |
| H  | 1.55008700  | 2.87177700  | 2.55291200  |
| C  | 3.50661900  | 2.77792500  | 0.47134100  |
| H  | 4.06951700  | 3.50339300  | -0.12951100 |
| H  | 3.97560500  | 1.79900500  | 0.27843200  |
| Pd | 0.37436500  | 0.66909600  | 0.03847800  |
| C  | 0.21582000  | -3.36242000 | -0.07511300 |
| C  | 0.17766900  | -2.04775800 | -0.49932600 |
| C  | -0.73461000 | -1.11195300 | 0.04425400  |
| C  | -1.65901400 | -1.58668700 | 0.99428900  |
| C  | -1.70660100 | -2.92415600 | 1.34862300  |
| C  | -0.72850600 | -3.80458500 | 0.86086600  |
| H  | 0.97571400  | -4.02165300 | -0.48293000 |
| H  | 0.91421000  | -1.73649700 | -1.24262700 |
| H  | -2.33974600 | -0.89000500 | 1.48558100  |
| H  | -2.42008500 | -3.30063100 | 2.07929500  |
| Cl | -3.75655200 | 0.46228500  | -3.19430800 |
| C  | 1.01212300  | -1.44119100 | 2.96788200  |
| C  | 0.00036600  | -1.97172800 | 3.77554800  |
| C  | 2.13689700  | -2.22143000 | 2.68766200  |
| C  | 0.11744700  | -3.25328800 | 4.29981900  |

|   |             |             |             |
|---|-------------|-------------|-------------|
| H | -0.88769000 | -1.38305400 | 3.99818700  |
| C | 2.25040300  | -3.50371200 | 3.21489300  |
| H | 2.91922700  | -1.82816700 | 2.04490500  |
| C | 1.24282100  | -4.02203500 | 4.02043600  |
| H | -0.67817000 | -3.65415600 | 4.92368500  |
| H | 3.13431300  | -4.09296800 | 2.98244800  |
| H | 1.33174800  | -5.02605800 | 4.43000400  |
| C | -0.20717800 | 1.12401400  | 3.44934000  |
| C | 0.01561400  | 1.08008600  | 4.83119400  |
| C | -1.23783400 | 1.92113900  | 2.95431500  |
| C | -0.78442900 | 1.81360100  | 5.69655300  |
| H | 0.81698300  | 0.46161100  | 5.23360100  |
| C | -2.03702400 | 2.66058600  | 3.82250400  |
| H | -1.39819200 | 1.96925500  | 1.87633200  |
| C | -1.81271500 | 2.60650000  | 5.19220800  |
| H | -0.60295900 | 1.77123000  | 6.76783100  |
| H | -2.83260200 | 3.28380000  | 3.41996100  |
| H | -2.43526000 | 3.18507500  | 5.87065700  |
| C | 2.56680500  | 2.46547500  | -2.09498200 |
| C | 3.02899800  | 3.61693300  | -2.74282500 |
| C | 2.78054200  | 1.21828200  | -2.67805600 |
| C | 3.68150100  | 3.51328300  | -3.96431800 |
| H | 2.87711100  | 4.59844400  | -2.29434600 |
| C | 3.45559900  | 1.11554600  | -3.88904000 |
| H | 2.42996000  | 0.31202600  | -2.19294300 |
| C | 3.89917400  | 2.26154800  | -4.53607300 |
| H | 4.03031200  | 4.41240500  | -4.46726000 |
| H | 3.63451800  | 0.12699600  | -4.30377500 |
| H | 4.42315400  | 2.18388300  | -5.48595700 |
| C | 0.94965600  | 4.13820500  | -0.38298400 |
| C | 0.92276200  | 4.98505100  | 0.72942600  |
| C | 0.14030600  | 4.45491700  | -1.48422400 |
| C | 0.12685200  | 6.12713100  | 0.73615500  |
| H | 1.53187000  | 4.76625900  | 1.60267500  |
| C | -0.65371700 | 5.59580000  | -1.47583300 |
| H | 0.13494200  | 3.80106600  | -2.35545800 |
| C | -0.65996200 | 6.43896200  | -0.36688300 |
| H | 0.13229900  | 6.77941100  | 1.60638100  |
| H | -1.26722500 | 5.82679100  | -2.34358400 |
| H | -1.27299900 | 7.33731900  | -0.36594000 |
| H | -1.01485800 | -4.80361800 | -5.04915900 |
| O | -0.76479700 | -5.05251900 | 1.36300600  |
| C | 0.27897600  | -5.93503100 | 1.00090700  |
| H | 0.10981700  | -6.85551500 | 1.56260200  |

|    |             |             |             |
|----|-------------|-------------|-------------|
| H  | 0.26073000  | -6.15852400 | -0.07431400 |
| H  | 1.26122800  | -5.51828300 | 1.26594900  |
| Cl | -0.42812500 | 0.91374000  | -2.25169900 |
| C  | 3.58662800  | 3.14714600  | 1.94877100  |
| H  | 4.59194200  | 2.87958300  | 2.30376800  |
| H  | 3.51486000  | 4.23780700  | 2.06223500  |

#### 4Ni<sup>+</sup>

G(Gibbs Free Energy) = -5015.170495 hartree

E(electronic Energy) = -5015.923516 hartree

|    |             |             |             |
|----|-------------|-------------|-------------|
| C  | -4.39446800 | 0.15476200  | 0.59340800  |
| C  | -5.18778300 | 1.00431000  | 1.36659300  |
| C  | -4.89747200 | 2.35973500  | 1.40726100  |
| C  | -3.82724200 | 2.83867100  | 0.66540400  |
| C  | -3.08054400 | 1.93006100  | -0.07320300 |
| N  | -3.33509200 | 0.61992800  | -0.09053000 |
| H  | -5.51502600 | 3.03348800  | 1.99655600  |
| H  | -6.04713300 | 0.62008300  | 1.90635000  |
| H  | -3.56208700 | 3.89276900  | 0.63821300  |
| H  | -2.24785800 | 2.25727800  | -0.69160900 |
| C  | -4.73950100 | -1.26780700 | 0.38656000  |
| C  | -5.80358300 | -1.88497200 | 1.04550300  |
| C  | -4.39915300 | -3.13833500 | -0.91210900 |
| C  | -6.16266800 | -3.17653900 | 0.69117200  |
| H  | -6.35580800 | -1.36395400 | 1.82107700  |
| H  | -3.82619100 | -3.58960600 | -1.71878200 |
| H  | -6.99025500 | -3.67150500 | 1.19251700  |
| C  | -5.46569200 | -3.80933900 | -0.32717400 |
| H  | -5.73309200 | -4.80463300 | -0.66795500 |
| N  | -4.01977200 | -1.91734200 | -0.54210200 |
| Ni | -2.37525900 | -0.71947100 | -1.45686100 |
| C  | -1.59114700 | -3.37225900 | -2.43043600 |
| C  | -1.20035900 | -4.29426100 | -3.40357400 |
| C  | -0.91883700 | -3.86747500 | -4.69400800 |
| C  | -1.02420200 | -2.51503300 | -5.00383900 |
| C  | -1.42170900 | -1.59059400 | -4.04056500 |
| C  | -1.72143000 | -2.02811500 | -2.75494400 |
| H  | -1.74266900 | -3.72012300 | -1.40942500 |
| H  | -1.09437200 | -5.34383200 | -3.13358800 |
| H  | -0.80192300 | -2.16649600 | -6.01039500 |
| H  | -1.51697600 | -0.54255700 | -4.30517300 |
| O  | 3.37755600  | -1.19046500 | -2.05164800 |
| S  | 4.16895200  | -0.46674100 | -1.04650000 |
| O  | 3.36505300  | 0.04492300  | 0.09459800  |

|    |             |             |             |
|----|-------------|-------------|-------------|
| O  | 5.17744200  | 0.46852500  | -1.53567300 |
| C  | 5.16284700  | -1.81443600 | -0.27137000 |
| F  | 6.10419600  | -2.24820800 | -1.09340700 |
| F  | 4.38116200  | -2.85748500 | 0.05039800  |
| F  | 5.74186200  | -1.39732500 | 0.85725600  |
| P  | 0.95591700  | 0.20980900  | 2.23881000  |
| P  | 1.24733600  | 2.81481500  | -0.28820000 |
| C  | 2.36671600  | 1.27623600  | 2.77707900  |
| H  | 2.74806700  | 0.84595700  | 3.71064900  |
| H  | 3.14770700  | 1.13881000  | 2.01987300  |
| C  | 1.96128700  | 2.74099900  | 2.95395600  |
| H  | 2.05311500  | 3.02253500  | 4.01059400  |
| H  | 0.89123300  | 2.86891600  | 2.72736400  |
| C  | 2.77558100  | 3.37847300  | 0.60945800  |
| H  | 3.13651600  | 4.24359500  | 0.03925100  |
| H  | 3.46927900  | 2.55544900  | 0.37670300  |
| Pd | 0.19403000  | 0.64304100  | 0.03045800  |
| C  | 1.06975800  | -2.95917100 | -0.40430300 |
| C  | 0.41739800  | -1.82587900 | -0.86682600 |
| C  | -0.78284200 | -1.32718600 | -0.28099800 |
| C  | -1.28989100 | -2.06770400 | 0.82510400  |
| C  | -0.73631800 | -3.26402600 | 1.20678000  |
| C  | 0.45598300  | -3.71683600 | 0.59455900  |
| H  | 2.01500900  | -3.24037900 | -0.85907100 |
| H  | 0.86058000  | -1.31941800 | -1.72435300 |
| H  | -2.16703000 | -1.70051100 | 1.35797100  |
| H  | -1.15041800 | -3.86588600 | 2.01297700  |
| Cl | -3.99399800 | -0.04833900 | -2.94850800 |
| C  | 1.53863500  | -1.42767600 | 2.81814400  |
| C  | 0.75401000  | -2.24644000 | 3.63749300  |
| C  | 2.83812500  | -1.83114400 | 2.49761800  |
| C  | 1.26951400  | -3.43327500 | 4.14462200  |
| H  | -0.26243000 | -1.95232400 | 3.89176700  |
| C  | 3.34910300  | -3.02050000 | 3.00584400  |
| H  | 3.44863700  | -1.21122200 | 1.84720200  |
| C  | 2.56888100  | -3.82128900 | 3.83243100  |
| H  | 0.65041800  | -4.05879300 | 4.78352500  |
| H  | 4.36458300  | -3.30968100 | 2.74453200  |
| H  | 2.96993200  | -4.75039200 | 4.23140400  |
| C  | -0.32115800 | 0.66486700  | 3.47787700  |
| C  | -0.03122900 | 0.61250100  | 4.84752100  |
| C  | -1.55483100 | 1.16587900  | 3.06642300  |
| C  | -0.96308300 | 1.04238300  | 5.78161400  |
| H  | 0.92825000  | 0.22496200  | 5.18726800  |



|    |             |             |             |
|----|-------------|-------------|-------------|
| C  | -2.48844500 | 1.60120000  | 4.00450300  |
| H  | -1.77563900 | 1.22399800  | 2.00057200  |
| C  | -2.19498500 | 1.53787600  | 5.36034000  |
| H  | -0.72706500 | 0.99470900  | 6.84197400  |
| H  | -3.44457800 | 1.99339700  | 3.66542900  |
| H  | -2.92306300 | 1.87829900  | 6.09283500  |
| C  | 1.94051700  | 2.96643800  | -1.97683300 |
| C  | 2.19464600  | 4.23259100  | -2.51816500 |
| C  | 2.36183600  | 1.83100800  | -2.66368500 |
| C  | 2.84834900  | 4.34950700  | -3.73750600 |
| H  | 1.87699300  | 5.13172000  | -1.99082700 |
| C  | 3.03832700  | 1.95205200  | -3.87184900 |
| H  | 2.17345800  | 0.84033400  | -2.26129600 |
| C  | 3.27477300  | 3.20848500  | -4.41316100 |
| H  | 3.03330100  | 5.33570600  | -4.15702100 |
| H  | 3.38641300  | 1.05033300  | -4.36848800 |
| H  | 3.79983500  | 3.30430400  | -5.36062500 |
| C  | -0.01117500 | 4.14999200  | -0.18824500 |
| C  | -0.28106300 | 4.82659000  | 1.00666800  |
| C  | -0.79544500 | 4.44175700  | -1.31357400 |
| C  | -1.28412900 | 5.78897100  | 1.06955100  |
| H  | 0.29470400  | 4.61520400  | 1.90333300  |
| C  | -1.80346000 | 5.39645100  | -1.24568500 |
| H  | -0.61657700 | 3.91421200  | -2.24760900 |
| C  | -2.04622600 | 6.07944800  | -0.05683100 |
| H  | -1.46428600 | 6.31534700  | 2.00396000  |
| H  | -2.39833600 | 5.60812000  | -2.13067800 |
| H  | -2.82629300 | 6.83584500  | -0.01010100 |
| H  | -0.60550500 | -4.58089900 | -5.45272300 |
| O  | 0.91673600  | -4.88445200 | 1.05629100  |
| C  | 2.13461300  | -5.38042600 | 0.52633400  |
| H  | 2.32120900  | -6.32783800 | 1.03469100  |
| H  | 2.05383200  | -5.55358700 | -0.55401800 |
| H  | 2.96116000  | -4.68752400 | 0.72439000  |
| Cl | -0.73689900 | 1.07348400  | -2.17047200 |
| C  | 2.76636600  | 3.70246100  | 2.09723800  |
| H  | 3.81115900  | 3.71012500  | 2.43850900  |
| H  | 2.39592400  | 4.72488300  | 2.25343200  |

**TS2<sup>Pd</sup>**

|   |            |             |             |
|---|------------|-------------|-------------|
| C | 4.85682800 | -0.59616000 | -0.95322200 |
| C | 6.17613600 | -0.47807900 | -0.52408700 |
| C | 6.63959500 | -1.34045100 | 0.45980200  |
| C | 5.78668800 | -2.30532100 | 0.98025200  |

|    |             |             |             |
|----|-------------|-------------|-------------|
| C  | 4.48179100  | -2.35703200 | 0.50780200  |
| N  | 4.03792200  | -1.51152900 | -0.41676600 |
| H  | 7.66505600  | -1.26280800 | 0.81117400  |
| H  | 6.83452000  | 0.27397500  | -0.94706700 |
| H  | 6.11952900  | -3.00702000 | 1.73831500  |
| H  | 3.75176400  | -3.07723700 | 0.87502600  |
| C  | 4.26200700  | 0.23011000  | -2.02270900 |
| C  | 4.96649100  | 1.21965300  | -2.70396300 |
| C  | 2.39935900  | 0.56899100  | -3.35662400 |
| C  | 4.34184100  | 1.89977500  | -3.73966700 |
| H  | 5.99013400  | 1.45664800  | -2.43023800 |
| H  | 1.37807300  | 0.26727900  | -3.58065900 |
| H  | 4.87385800  | 2.67825300  | -4.28042200 |
| C  | 3.04055800  | 1.56186100  | -4.08516900 |
| H  | 2.52092600  | 2.05466200  | -4.90019600 |
| N  | 2.98736300  | -0.05682500 | -2.33858400 |
| Ni | 2.11449100  | -1.47454800 | -1.14304000 |
| C  | -0.77241600 | 0.17912900  | -2.37027400 |
| C  | -1.23975300 | 0.06482700  | -3.67781900 |
| C  | -1.24705500 | -1.17942200 | -4.30732500 |
| C  | -0.81584300 | -2.30774600 | -3.62367400 |
| C  | -0.39722600 | -2.21679800 | -2.29169700 |
| C  | -0.37896100 | -0.96730200 | -1.68462900 |
| H  | -0.77050300 | 1.16379600  | -1.91005300 |
| H  | -1.61711600 | 0.95986900  | -4.16961600 |
| H  | -0.80182300 | -3.28097500 | -4.10981400 |
| H  | -0.09385700 | -3.11465300 | -1.76089900 |
| O  | -2.79908600 | 2.25968000  | -0.32579900 |
| S  | -2.59731400 | 3.02559100  | -1.57833100 |
| O  | -3.31270800 | 2.50162900  | -2.74525600 |
| O  | -1.19729100 | 3.42365300  | -1.80760000 |
| C  | -3.43434500 | 4.62015100  | -1.21419100 |
| F  | -2.87429000 | 5.20301600  | -0.14814000 |
| F  | -4.72013400 | 4.42542900  | -0.94895000 |
| F  | -3.33277300 | 5.45115400  | -2.24277600 |
| P  | -0.95289300 | 0.98815300  | 2.35600900  |
| P  | -2.59548400 | -2.03671700 | 0.49033700  |
| C  | -3.74937300 | 0.51846600  | 2.20702700  |
| H  | -4.74673800 | 0.94939000  | 2.36514500  |
| H  | -3.64796500 | 0.44099200  | 1.11558500  |
| C  | -3.66298500 | -0.86227600 | 2.86211400  |
| H  | -4.39724200 | -0.94841500 | 3.67449600  |
| H  | -2.68532000 | -1.00802100 | 3.34392300  |
| C  | -3.89158700 | -1.97232800 | 1.85380800  |

|    |             |             |             |
|----|-------------|-------------|-------------|
| H  | -3.92692500 | -2.95935600 | 2.32901400  |
| H  | -4.85170100 | -1.82729600 | 1.34175300  |
| Pd | -0.50043200 | -0.54240700 | 0.43762300  |
| C  | 2.44252900  | 2.60355500  | -0.24560200 |
| C  | 1.30713700  | 1.80088800  | -0.29055400 |
| C  | 1.24704500  | 0.59371300  | 0.41238900  |
| C  | 2.31624000  | 0.26688000  | 1.25857700  |
| C  | 3.44833800  | 1.06929700  | 1.32109900  |
| C  | 3.53024300  | 2.22474600  | 0.54529300  |
| H  | 2.44702100  | 3.52912500  | -0.81488100 |
| H  | 0.45935100  | 2.17511900  | -0.86521700 |
| H  | 2.27943700  | -0.63590700 | 1.86491700  |
| H  | 4.29400400  | 0.80342700  | 1.95372100  |
| Cl | 2.66583000  | -3.16487500 | -2.62331200 |
| C  | -0.08767400 | 2.60490500  | 2.38686800  |
| C  | 1.08750000  | 2.81215500  | 3.11391300  |
| C  | -0.58095200 | 3.63449600  | 1.57817600  |
| C  | 1.74496800  | 4.03612400  | 3.04377800  |
| H  | 1.49922400  | 2.01679200  | 3.73208500  |
| C  | 0.07769400  | 4.85481900  | 1.51175000  |
| H  | -1.46540700 | 3.47306400  | 0.96751200  |
| C  | 1.24010100  | 5.05998100  | 2.24780000  |
| H  | 2.66083600  | 4.18543000  | 3.61198000  |
| H  | -0.32324900 | 5.63332500  | 0.86721500  |
| H  | 1.75632000  | 6.01685700  | 2.20051900  |
| C  | -0.43078500 | 0.16328600  | 3.91406900  |
| C  | -0.56871600 | 0.80160000  | 5.15178900  |
| C  | 0.05996200  | -1.14396700 | 3.87559000  |
| C  | -0.22938600 | 0.14063200  | 6.32560400  |
| H  | -0.93272200 | 1.82745100  | 5.19880800  |
| C  | 0.39420600  | -1.80681800 | 5.05291900  |
| H  | 0.17628200  | -1.65233000 | 2.91641800  |
| C  | 0.24865200  | -1.16638800 | 6.27798200  |
| H  | -0.34083000 | 0.64648000  | 7.28172500  |
| H  | 0.76862100  | -2.82707000 | 5.00549600  |
| H  | 0.50816400  | -1.68355100 | 7.19872300  |
| C  | -3.66320000 | -1.92230200 | -0.99100400 |
| C  | -4.46317400 | -2.98572200 | -1.42691500 |
| C  | -3.77718100 | -0.67940800 | -1.61556000 |
| C  | -5.32454200 | -2.81135700 | -2.50253600 |
| H  | -4.41462100 | -3.95116100 | -0.92567500 |
| C  | -4.64768100 | -0.50488900 | -2.68726800 |
| H  | -3.19576700 | 0.17343100  | -1.26999400 |
| C  | -5.41111400 | -1.57420400 | -3.13829200 |

|    |             |             |             |
|----|-------------|-------------|-------------|
| H  | -5.93553300 | -3.64449600 | -2.84304400 |
| H  | -4.70025100 | 0.47726500  | -3.15279100 |
| H  | -6.08639700 | -1.44528100 | -3.98130500 |
| C  | -2.04172300 | -3.77759500 | 0.63283300  |
| C  | -1.65519500 | -4.22679500 | 1.90089000  |
| C  | -1.86086500 | -4.62336700 | -0.46306000 |
| C  | -1.11318900 | -5.49279700 | 2.07095700  |
| H  | -1.75850400 | -3.57187000 | 2.76788300  |
| C  | -1.31382300 | -5.89123700 | -0.29203900 |
| H  | -2.14973700 | -4.29281800 | -1.45830300 |
| C  | -0.93938500 | -6.32892700 | 0.97227900  |
| H  | -0.81824600 | -5.82506900 | 3.06369500  |
| H  | -1.17824100 | -6.53743600 | -1.15571400 |
| H  | -0.50936500 | -7.31899800 | 1.10163200  |
| H  | -1.59963300 | -1.26711400 | -5.33238500 |
| O  | 4.69644800  | 2.91610000  | 0.63154200  |
| C  | 4.76605200  | 4.15315700  | -0.03686100 |
| H  | 5.75011300  | 4.57211000  | 0.18361200  |
| H  | 4.66159300  | 4.03354200  | -1.12572300 |
| H  | 3.99080300  | 4.84741700  | 0.31674700  |
| Cl | 1.10595400  | -2.70231200 | 0.60277900  |
| C  | -2.70770000 | 1.51273300  | 2.67846800  |
| H  | -2.84435500 | 2.45592800  | 2.14107600  |
| H  | -2.78501700 | 1.71664800  | 3.75604200  |

### 3Pd

G(Gibbs Free Energy) = -5015.178194 hartree

E(electronic Energy) = -5015.9268832 hartree

|   |             |             |             |
|---|-------------|-------------|-------------|
| C | -4.88964700 | -1.26870900 | -0.85753000 |
| C | -6.05851200 | -1.00402000 | -1.56495700 |
| C | -6.04138300 | -1.11028600 | -2.94928500 |
| C | -4.87039000 | -1.48868700 | -3.59327200 |
| C | -3.74487800 | -1.74408500 | -2.82032800 |
| N | -3.76480200 | -1.62063700 | -1.49698500 |
| H | -6.94223900 | -0.90307200 | -3.52067800 |
| H | -6.96937800 | -0.71880000 | -1.04832600 |
| H | -4.82386400 | -1.58952000 | -4.67273100 |
| H | -2.79105900 | -2.04482300 | -3.25177500 |
| C | -4.77809000 | -1.18172500 | 0.61215600  |
| C | -5.81809200 | -0.75568800 | 1.43301200  |
| C | -3.40005700 | -1.51993900 | 2.44596000  |
| C | -5.62114100 | -0.72428100 | 2.80653100  |
| H | -6.76438200 | -0.43814500 | 1.00636700  |
| H | -2.42024900 | -1.83285500 | 2.80046500  |

|    |             |             |             |
|----|-------------|-------------|-------------|
| H  | -6.42197000 | -0.39529600 | 3.46404600  |
| C  | -4.39569300 | -1.11593600 | 3.32636000  |
| H  | -4.20064300 | -1.10848700 | 4.39368900  |
| N  | -3.59040900 | -1.54702800 | 1.12751300  |
| Ni | -2.18535600 | -2.02827400 | -0.26896000 |
| C  | 0.21721100  | -0.88799900 | 2.91969100  |
| C  | -0.03761500 | -1.76812400 | 3.96894800  |
| C  | -0.39651400 | -3.09417400 | 3.72305000  |
| C  | -0.48263800 | -3.53768000 | 2.41285000  |
| C  | -0.18570700 | -2.66751500 | 1.35404900  |
| C  | 0.15425800  | -1.33533000 | 1.59896900  |
| H  | 0.49742800  | 0.13566100  | 3.16015300  |
| H  | 0.05368800  | -1.40489700 | 4.99119600  |
| H  | -0.77696600 | -4.55816500 | 2.17702100  |
| H  | -0.16253700 | -3.09220700 | 0.35232000  |
| O  | 1.42260000  | 1.97578900  | 1.32390900  |
| S  | 1.76991000  | 2.58231000  | 2.63889100  |
| O  | 3.20975500  | 2.58273600  | 2.91631000  |
| O  | 0.88166600  | 2.20624800  | 3.74081000  |
| C  | 1.35711500  | 4.34670600  | 2.32435800  |
| F  | 0.06524400  | 4.46484500  | 2.01383900  |
| F  | 2.06917600  | 4.81928500  | 1.30008900  |
| F  | 1.60584100  | 5.08764000  | 3.39170900  |
| P  | 1.39218500  | 1.61402300  | -1.78092400 |
| P  | 3.06049100  | -0.91488000 | 0.39011200  |
| C  | 2.67225900  | 2.92967400  | -1.44423200 |
| H  | 2.98051600  | 3.28276200  | -2.43761500 |
| H  | 2.13456700  | 3.75776800  | -0.97075100 |
| C  | 4.56965900  | 1.23277300  | -0.82123600 |
| H  | 5.63858900  | 1.39605300  | -1.01042000 |
| H  | 4.19747800  | 0.75067700  | -1.73776700 |
| C  | 4.45808100  | 0.29529000  | 0.38672900  |
| H  | 5.36887100  | -0.30063700 | 0.53505400  |
| H  | 4.33981200  | 0.89328600  | 1.29883900  |
| Pd | 0.69982400  | -0.03128700 | 0.07027400  |
| C  | -2.90447900 | 1.95009400  | 1.49824500  |
| C  | -1.64790700 | 1.35756100  | 1.38093900  |
| C  | -1.24277600 | 0.75954500  | 0.18667000  |
| C  | -2.09992300 | 0.83342000  | -0.91436300 |
| C  | -3.35059400 | 1.43466800  | -0.81095000 |
| C  | -3.77487900 | 1.96205500  | 0.40464000  |
| H  | -3.18718700 | 2.39263400  | 2.44985700  |
| H  | -0.98999800 | 1.38799800  | 2.24709400  |
| H  | -1.79553500 | 0.43472600  | -1.87837500 |

|    |             |             |             |
|----|-------------|-------------|-------------|
| H  | -4.01962000 | 1.48566500  | -1.66957300 |
| Cl | -2.63859700 | -4.27712400 | -0.34600100 |
| C  | -0.00810800 | 2.69400500  | -2.27101300 |
| C  | -0.68944500 | 2.54648000  | -3.48017800 |
| C  | -0.47091200 | 3.63066500  | -1.33845200 |
| C  | -1.79367100 | 3.34422400  | -3.76717500 |
| H  | -0.35754800 | 1.80376100  | -4.20369800 |
| C  | -1.57284600 | 4.42341900  | -1.62742100 |
| H  | 0.01329900  | 3.72105400  | -0.36618800 |
| C  | -2.23424400 | 4.28644700  | -2.84509800 |
| H  | -2.30968700 | 3.22688200  | -4.71765200 |
| H  | -1.92134600 | 5.14368100  | -0.89074200 |
| H  | -3.09718000 | 4.90889100  | -3.07023000 |
| C  | 1.99507600  | 0.91611100  | -3.37628900 |
| C  | 2.30067700  | 1.74263900  | -4.46629600 |
| C  | 2.22422500  | -0.45507500 | -3.49223200 |
| C  | 2.82243500  | 1.20663400  | -5.63589200 |
| H  | 2.11709200  | 2.81500300  | -4.40749700 |
| C  | 2.75950800  | -0.99246900 | -4.65974200 |
| H  | 1.98434700  | -1.11511600 | -2.66363700 |
| C  | 3.05841400  | -0.16319900 | -5.73257000 |
| H  | 3.05054700  | 1.86067600  | -6.47442200 |
| H  | 2.94040800  | -2.06404400 | -4.71595100 |
| H  | 3.47500300  | -0.57955600 | -6.64692800 |
| C  | 3.32037100  | -1.69438900 | 2.03308800  |
| C  | 3.30876300  | -3.08006100 | 2.20396300  |
| C  | 3.46431000  | -0.86968000 | 3.15608700  |
| C  | 3.45587300  | -3.63341200 | 3.47117800  |
| H  | 3.19196400  | -3.73669300 | 1.34401600  |
| C  | 3.61826700  | -1.42893000 | 4.41871000  |
| H  | 3.44668000  | 0.21675000  | 3.06466600  |
| C  | 3.61434500  | -2.81039100 | 4.58020100  |
| H  | 3.44791000  | -4.71465900 | 3.58801100  |
| H  | 3.73294300  | -0.77413700 | 5.27905000  |
| H  | 3.73262500  | -3.24537100 | 5.57001100  |
| C  | 3.58561900  | -2.19498800 | -0.81614900 |
| C  | 4.82875100  | -2.17288000 | -1.45507500 |
| C  | 2.67556300  | -3.20411400 | -1.15259800 |
| C  | 5.15140800  | -3.13608700 | -2.40581000 |
| H  | 5.55586000  | -1.39755100 | -1.22580200 |
| C  | 3.00016000  | -4.16950700 | -2.09763000 |
| H  | 1.69010300  | -3.22008000 | -0.69270400 |
| C  | 4.24022500  | -4.13558100 | -2.72858500 |
| H  | 6.12088800  | -3.10126200 | -2.89721700 |

|    |             |             |             |
|----|-------------|-------------|-------------|
| H  | 2.27490800  | -4.94039300 | -2.34570900 |
| H  | 4.49488900  | -4.88614000 | -3.47329400 |
| H  | -0.60045900 | -3.77144300 | 4.54931500  |
| O  | -5.04780300 | 2.44833900  | 0.43337100  |
| C  | -5.48519000 | 3.04619900  | 1.62775300  |
| H  | -6.50388500 | 3.39711100  | 1.44775900  |
| H  | -5.49554900 | 2.32926400  | 2.46366500  |
| H  | -4.85742500 | 3.90294700  | 1.91052800  |
| Cl | -0.40483700 | -1.77627600 | -1.79244300 |
| C  | 3.88368600  | 2.58868500  | -0.58572000 |
| H  | 3.59231000  | 2.65848600  | 0.46584700  |
| H  | 4.61254300  | 3.39490400  | -0.74151800 |

#### 4Pd

G(Gibbs Free Energy) = -3430.464908 hartree

E(electronic Energy) = -3431.0725201 hartree

|   |             |             |             |
|---|-------------|-------------|-------------|
| C | -1.16636600 | -2.22498300 | 1.63612600  |
| C | -1.67730300 | -3.07243900 | 2.61763300  |
| C | -2.28829800 | -2.54919000 | 3.75399900  |
| C | -2.38170700 | -1.17252100 | 3.92018800  |
| C | -1.87430200 | -0.31077600 | 2.94516700  |
| C | -1.26999400 | -0.85062900 | 1.81783200  |
| H | -0.69320300 | -2.63293700 | 0.74236300  |
| H | -1.60108800 | -4.14940200 | 2.48122300  |
| H | -2.85052100 | -0.75660100 | 4.81020000  |
| H | -1.95412100 | 0.76616900  | 3.08674400  |
| O | -0.34970800 | -3.59725700 | -2.39205100 |
| S | 0.82353400  | -2.77756000 | -2.08537200 |
| O | 0.59309500  | -1.73671600 | -1.05066100 |
| O | 1.62026100  | -2.30260400 | -3.22418800 |
| C | 1.95420900  | -3.91942800 | -1.19518300 |
| F | 2.26794500  | -4.96831300 | -1.94034200 |
| F | 1.38497600  | -4.34760600 | -0.07027800 |
| F | 3.08369200  | -3.28327300 | -0.86595800 |
| P | 1.13202500  | 1.42140000  | -1.31624800 |
| P | -2.59806100 | 0.33072100  | -0.62310500 |
| C | 0.83996200  | 0.93880500  | -3.08783300 |
| H | 1.05757400  | 1.81800500  | -3.70992600 |
| H | 1.56265200  | 0.15395000  | -3.33594100 |
| C | -1.69273100 | 1.39927400  | -3.07513500 |
| H | -2.00010300 | 1.86804100  | -4.01929200 |
| H | -1.35998000 | 2.23317400  | -2.43663100 |
| C | -2.88726100 | 0.71294400  | -2.43011300 |
| H | -3.79915200 | 1.31846600  | -2.49604200 |

|    |             |             |             |
|----|-------------|-------------|-------------|
| H  | -3.09369700 | -0.24082700 | -2.93259300 |
| Pd | -0.32840200 | 0.30879600  | 0.38601700  |
| C  | 3.24247700  | -0.67018300 | 2.50579200  |
| C  | 2.25877500  | -0.62658300 | 1.52722100  |
| C  | 1.35825000  | 0.43871500  | 1.50065000  |
| C  | 1.52899900  | 1.53958200  | 2.34742700  |
| C  | 2.50723900  | 1.50029500  | 3.32491800  |
| C  | 3.37290000  | 0.39880500  | 3.40121000  |
| H  | 3.91578100  | -1.52125300 | 2.54390900  |
| H  | 2.17587100  | -1.42792200 | 0.79440300  |
| H  | 0.88363600  | 2.41441400  | 2.26354800  |
| H  | 2.64600900  | 2.31434000  | 4.03207900  |
| C  | 2.92549700  | 1.11724900  | -1.07765200 |
| C  | 3.68975700  | 1.99078900  | -0.29575200 |
| C  | 3.50357300  | -0.07196000 | -1.53441100 |
| C  | 5.00881300  | 1.68714400  | 0.01667200  |
| H  | 3.24980600  | 2.91285300  | 0.08109900  |
| C  | 4.82516500  | -0.36995400 | -1.21746700 |
| H  | 2.92958400  | -0.79096000 | -2.11860100 |
| C  | 5.57928100  | 0.50355800  | -0.44245900 |
| H  | 5.58991000  | 2.37676300  | 0.62492200  |
| H  | 5.25775900  | -1.30065300 | -1.57690700 |
| H  | 6.61151400  | 0.26401800  | -0.19610900 |
| C  | 1.01474700  | 3.25401900  | -1.32688700 |
| C  | 1.84010400  | 4.03608600  | -2.14292500 |
| C  | 0.06210300  | 3.88628400  | -0.52817400 |
| C  | 1.70775500  | 5.41839800  | -2.15642800 |
| H  | 2.60127500  | 3.55952100  | -2.75995900 |
| C  | -0.07565800 | 5.27095700  | -0.54358800 |
| H  | -0.58863800 | 3.27820600  | 0.09961800  |
| C  | 0.74876700  | 6.03771400  | -1.35772900 |
| H  | 2.35534700  | 6.01688300  | -2.79271300 |
| H  | -0.83035200 | 5.74577600  | 0.07947600  |
| H  | 0.64648400  | 7.12015400  | -1.37275700 |
| C  | -3.49308800 | -1.24534800 | -0.40673900 |
| C  | -4.51377400 | -1.43640900 | 0.52487800  |
| C  | -3.00156400 | -2.33901200 | -1.12729500 |
| C  | -5.05483300 | -2.70466100 | 0.71045800  |
| H  | -4.87849900 | -0.60040900 | 1.11911600  |
| C  | -3.54013100 | -3.60349500 | -0.93356400 |
| H  | -2.15689300 | -2.23805800 | -1.80970600 |
| C  | -4.57277600 | -3.78675800 | -0.01864000 |
| H  | -5.85143800 | -2.84716600 | 1.43711500  |
| H  | -3.12600600 | -4.44055300 | -1.49014600 |



|   |             |             |             |
|---|-------------|-------------|-------------|
| H | -4.99434500 | -4.77723800 | 0.13688400  |
| C | -3.61273000 | 1.61881100  | 0.20129800  |
| C | -4.96035400 | 1.81444400  | -0.12252500 |
| C | -3.02437100 | 2.45542700  | 1.15123100  |
| C | -5.69356600 | 2.82513000  | 0.48619300  |
| H | -5.44504500 | 1.16241400  | -0.84867400 |
| C | -3.75322700 | 3.47454200  | 1.75630500  |
| H | -1.97865000 | 2.29452300  | 1.41989700  |
| C | -5.08953600 | 3.65972200  | 1.42295600  |
| H | -6.74066300 | 2.96349300  | 0.22805000  |
| H | -3.27705200 | 4.11948900  | 2.49115300  |
| H | -5.66423100 | 4.45320800  | 1.89450000  |
| H | -2.69446700 | -3.21723000 | 4.51027400  |
| O | 4.32437000  | 0.47617900  | 4.35517100  |
| C | 5.29794700  | -0.54273800 | 4.40334300  |
| H | 5.98678500  | -0.27361700 | 5.20580500  |
| H | 4.84996300  | -1.52025200 | 4.62748700  |
| H | 5.85185400  | -0.61054900 | 3.45656000  |
| C | -0.55965100 | 0.40049700  | -3.31787200 |
| H | -0.62673100 | -0.00634100 | -4.33544700 |
| H | -0.67873500 | -0.46419400 | -2.65122800 |

## Ni<sup>II</sup>

G(Gibbs Free Energy) = -1584.704906 hartree

E(electronic Energy) = -1584.8169541 hartree

|   |             |             |             |
|---|-------------|-------------|-------------|
| C | 1.57450100  | 0.73466500  | -0.00002100 |
| C | 2.72379300  | 1.51582700  | 0.00018300  |
| C | 2.59984600  | 2.89791100  | 0.00024500  |
| C | 1.33096400  | 3.45757600  | 0.00009200  |
| C | 0.22449500  | 2.61864400  | -0.00009600 |
| N | 0.34180900  | 1.28692400  | -0.00013300 |
| H | 3.48602900  | 3.52668700  | 0.00042200  |
| H | 3.70492000  | 1.05146400  | 0.00032200  |
| H | 1.18529800  | 4.53292300  | 0.00013900  |
| H | -0.80056800 | 2.98537300  | -0.00023000 |
| C | 1.57648700  | -0.73038700 | -0.00004300 |
| C | 2.72794400  | -1.50837100 | -0.00027600 |
| C | 0.23170300  | -2.61806100 | 0.00015900  |
| C | 2.60781500  | -2.89077800 | -0.00025800 |
| H | 3.70778500  | -1.04129200 | -0.00049900 |
| H | -0.79231700 | -2.98766200 | 0.00030500  |
| H | 3.49572800  | -3.51710800 | -0.00044100 |
| C | 1.34046800  | -3.45392600 | -0.00002400 |
| H | 1.19776700  | -4.52967200 | -0.00000300 |

|    |             |             |             |
|----|-------------|-------------|-------------|
| N  | 0.34532400  | -1.28599200 | 0.00014700  |
| Ni | -1.11919800 | -0.00154600 | 0.00006000  |
| Cl | -2.65758700 | 1.53034900  | -0.00027300 |
| Cl | -2.65330200 | -1.53755700 | 0.00018100  |

### TS3<sup>Pd</sup>

G(Gibbs Free Energy) = -3430.462681 hartree

E(electronic Energy) = -3431.071409 hartree

|    |             |             |             |
|----|-------------|-------------|-------------|
| C  | -0.96983800 | -2.25095100 | 1.68080100  |
| C  | -1.60875300 | -3.10163200 | 2.58152000  |
| C  | -2.25333000 | -2.58767100 | 3.70371700  |
| C  | -2.25732500 | -1.21697200 | 3.93932800  |
| C  | -1.62085300 | -0.35115500 | 3.04827500  |
| C  | -1.04462100 | -0.88085000 | 1.90119000  |
| H  | -0.45368900 | -2.64678600 | 0.80570700  |
| H  | -1.59479800 | -4.17427900 | 2.39897400  |
| H  | -2.74256800 | -0.81235800 | 4.82556300  |
| H  | -1.60388300 | 0.71893600  | 3.24945600  |
| O  | -0.15266900 | -3.59175800 | -2.49910800 |
| S  | 0.95528700  | -2.70313200 | -2.14589400 |
| O  | 0.64469900  | -1.72368000 | -1.07340900 |
| O  | 1.72533400  | -2.12887400 | -3.25743300 |
| C  | 2.15726100  | -3.79775500 | -1.28984700 |
| F  | 2.53363600  | -4.80369900 | -2.06445200 |
| F  | 1.61733300  | -4.29279700 | -0.17702200 |
| F  | 3.24613200  | -3.10416400 | -0.93994200 |
| P  | 1.04865700  | 1.52351400  | -1.29785800 |
| P  | -2.60625300 | 0.22728000  | -0.65707800 |
| C  | 0.79318600  | 1.05202700  | -3.07866700 |
| H  | 0.95422600  | 1.95499900  | -3.68401900 |
| H  | 1.56839900  | 0.32132400  | -3.33667200 |
| C  | -1.76996200 | 1.34338500  | -3.09694700 |
| H  | -2.09644700 | 1.79040000  | -4.04529300 |
| H  | -1.50250800 | 2.19786500  | -2.45448500 |
| C  | -2.92470100 | 0.57731300  | -2.46416900 |
| H  | -3.87385800 | 1.12045700  | -2.54382000 |
| H  | -3.06032900 | -0.38854900 | -2.96801900 |
| Pd | -0.35455900 | 0.34476200  | 0.34250600  |
| C  | 3.21130100  | -0.65929200 | 2.49461800  |
| C  | 2.20235900  | -0.62944000 | 1.54512800  |
| C  | 1.27623400  | 0.42476800  | 1.52315300  |
| C  | 1.45473000  | 1.51842200  | 2.38899700  |
| C  | 2.45010800  | 1.49290400  | 3.34476400  |
| C  | 3.34117800  | 0.40691500  | 3.39460600  |

|   |             |             |             |
|---|-------------|-------------|-------------|
| H | 3.90352000  | -1.49578900 | 2.51172600  |
| H | 2.11738000  | -1.43028700 | 0.81065100  |
| H | 0.79275000  | 2.38331900  | 2.32578000  |
| H | 2.59005400  | 2.30417900  | 4.05498200  |
| C | 2.84807000  | 1.29101400  | -1.03313800 |
| C | 3.56746600  | 2.18309400  | -0.23054900 |
| C | 3.47453400  | 0.12774300  | -1.49221800 |
| C | 4.89252700  | 1.92315600  | 0.09762300  |
| H | 3.08916600  | 3.08553900  | 0.14737400  |
| C | 4.80094000  | -0.12644200 | -1.15917100 |
| H | 2.93286400  | -0.60502200 | -2.09032500 |
| C | 5.51242000  | 0.76663400  | -0.36621600 |
| H | 5.44019100  | 2.62702800  | 0.72048000  |
| H | 5.26901500  | -1.03968900 | -1.51895900 |
| H | 6.54961100  | 0.56308000  | -0.10839900 |
| C | 0.83974300  | 3.34633600  | -1.27104800 |
| C | 1.63108700  | 4.18471000  | -2.06452200 |
| C | -0.14945700 | 3.91224900  | -0.46675000 |
| C | 1.42938900  | 5.55864800  | -2.05120900 |
| H | 2.41905800  | 3.75932500  | -2.68534600 |
| C | -0.35633000 | 5.28833900  | -0.45619500 |
| H | -0.77126500 | 3.25747000  | 0.14416600  |
| C | 0.43425400  | 6.11190200  | -1.24841100 |
| H | 2.05046900  | 6.20215300  | -2.66973500 |
| H | -1.13820400 | 5.71244400  | 0.16977000  |
| H | 0.27709800  | 7.18784800  | -1.24278700 |
| C | -3.37138800 | -1.41184200 | -0.40323700 |
| C | -4.34953000 | -1.66172000 | 0.55985700  |
| C | -2.82182000 | -2.48030100 | -1.12028200 |
| C | -4.79157400 | -2.96241800 | 0.78118100  |
| H | -4.75937100 | -0.84405700 | 1.15038300  |
| C | -3.26635300 | -3.77631300 | -0.89659300 |
| H | -2.00674700 | -2.32977700 | -1.82845300 |
| C | -4.25721200 | -4.01859600 | 0.05069400  |
| H | -5.55452100 | -3.14928400 | 1.53366400  |
| H | -2.81265400 | -4.59049300 | -1.45623000 |
| H | -4.60413300 | -5.03386300 | 0.22984400  |
| C | -3.72367900 | 1.42454100  | 0.17268300  |
| C | -5.07687200 | 1.53374100  | -0.16798600 |
| C | -3.21270900 | 2.26492800  | 1.16350700  |
| C | -5.89116000 | 2.46672800  | 0.46099300  |
| H | -5.50195100 | 0.87142200  | -0.92171700 |
| C | -4.02395200 | 3.20582800  | 1.79056600  |
| H | -2.16277800 | 2.16897600  | 1.44589000  |

|   |             |             |             |
|---|-------------|-------------|-------------|
| C | -5.36418700 | 3.30763000  | 1.43804400  |
| H | -6.94146300 | 2.53855100  | 0.18888300  |
| H | -3.60867400 | 3.85569400  | 2.55740200  |
| H | -6.00236600 | 4.04019800  | 1.92638800  |
| H | -2.73711100 | -3.26075100 | 4.40806500  |
| O | 4.30968100  | 0.49898100  | 4.32649200  |
| C | 5.30375200  | -0.50235800 | 4.35443000  |
| H | 6.00025000  | -0.22257700 | 5.14636600  |
| H | 4.87678800  | -1.48814200 | 4.58180500  |
| H | 5.84192600  | -0.55515000 | 3.39812300  |
| C | -0.56740200 | 0.42505200  | -3.32594200 |
| H | -0.59320500 | 0.01780800  | -4.34523200 |
| H | -0.63661800 | -0.44819700 | -2.66391400 |

### **Pd<sup>I</sup>**

G(Gibbs Free Energy) = -2853.308238 hartree

E(electronic Energy) = -2853.7209229 hartree

|    |             |             |             |
|----|-------------|-------------|-------------|
| O  | 1.73694800  | -2.02929200 | 0.60650600  |
| S  | 1.87544200  | -2.28629300 | -0.87472000 |
| O  | 2.12961400  | -1.06637300 | -1.64385900 |
| O  | 0.87933100  | -3.21773300 | -1.39659800 |
| C  | 3.47676100  | -3.18361300 | -0.89968700 |
| F  | 3.39346800  | -4.30553400 | -0.20038400 |
| F  | 4.42824700  | -2.41848700 | -0.37146600 |
| F  | 3.81045600  | -3.47755400 | -2.14810100 |
| P  | -2.25550000 | -0.27508800 | 0.86027300  |
| P  | 0.77793300  | 1.63308800  | 0.86768200  |
| C  | -2.86506600 | 0.39227000  | 2.47550900  |
| H  | -3.80542100 | 0.94721400  | 2.35689900  |
| H  | -3.09726600 | -0.49373400 | 3.08035300  |
| C  | -1.42024600 | 2.53547000  | 2.44359800  |
| H  | -1.77355200 | 3.39944300  | 3.02115400  |
| H  | -1.94962000 | 2.60146400  | 1.48155300  |
| C  | 0.08379700  | 2.70002500  | 2.21276700  |
| H  | 0.33906900  | 3.74560000  | 1.99166700  |
| H  | 0.64181700  | 2.43154300  | 3.12018200  |
| Pd | 0.03356100  | -0.62256000 | 0.81913300  |
| C  | -3.17535900 | -1.83521600 | 0.60759900  |
| C  | -4.53484700 | -1.94421600 | 0.91625900  |
| C  | -2.49777200 | -2.92752900 | 0.05982500  |
| C  | -5.20524000 | -3.13975300 | 0.69448200  |
| H  | -5.07484000 | -1.09034300 | 1.32550100  |
| C  | -3.17705900 | -4.12062000 | -0.16802600 |
| H  | -1.43792800 | -2.85358500 | -0.19773400 |

|   |             |             |             |
|---|-------------|-------------|-------------|
| C | -4.52490100 | -4.22829800 | 0.15338700  |
| H | -6.26132000 | -3.22308700 | 0.94007100  |
| H | -2.64335900 | -4.96558900 | -0.59488600 |
| H | -5.05166600 | -5.16368700 | -0.01995100 |
| C | -2.87853200 | 0.79961000  | -0.48259200 |
| C | -3.92999200 | 1.70720800  | -0.34216700 |
| C | -2.26196300 | 0.65301600  | -1.73031000 |
| C | -4.35424900 | 2.46240500  | -1.43099000 |
| H | -4.42847100 | 1.83595500  | 0.61726800  |
| C | -2.69774700 | 1.39713200  | -2.81859700 |
| H | -1.42993800 | -0.04542400 | -1.84301600 |
| C | -3.74032500 | 2.30674000  | -2.66855200 |
| H | -5.17077100 | 3.17056700  | -1.31085400 |
| H | -2.20838300 | 1.27716900  | -3.78185000 |
| H | -4.07288000 | 2.89775600  | -3.51864500 |
| C | 2.58589100  | 1.84600400  | 1.04885100  |
| C | 3.15256600  | 3.12606600  | 1.05137900  |
| C | 3.40834000  | 0.72338900  | 1.15468000  |
| C | 4.52598100  | 3.27869200  | 1.18029800  |
| H | 2.52032400  | 4.00605900  | 0.93298300  |
| C | 4.78626600  | 0.88327300  | 1.27309300  |
| H | 2.97694200  | -0.27686600 | 1.12256600  |
| C | 5.34324700  | 2.15553500  | 1.29200100  |
| H | 4.96264300  | 4.27468600  | 1.18326900  |
| H | 5.42028900  | 0.00235800  | 1.33744900  |
| H | 6.42011500  | 2.27725500  | 1.38338400  |
| C | 0.40639200  | 2.51488800  | -0.68851900 |
| C | -0.41137500 | 3.64448900  | -0.76379600 |
| C | 0.97706500  | 1.99607900  | -1.85869400 |
| C | -0.65095300 | 4.25420100  | -1.99137900 |
| H | -0.87006400 | 4.06105600  | 0.13117800  |
| C | 0.74556900  | 2.61931000  | -3.07753200 |
| H | 1.59117700  | 1.09519000  | -1.81343400 |
| C | -0.06862900 | 3.74726900  | -3.14705200 |
| H | -1.29398000 | 5.13002600  | -2.04086200 |
| H | 1.19997400  | 2.21578000  | -3.97914200 |
| H | -0.25201700 | 4.22938400  | -4.10468200 |
| C | -1.80271000 | 1.23654300  | 3.17596300  |
| H | -2.15571000 | 1.47206900  | 4.18815900  |
| H | -0.90866300 | 0.60934100  | 3.30786300  |

**4Pd'**

G(Gibbs Free Energy) = -2469.277973 hartree

E(electronic Energy) = -2469.8671544 hartree

|   |             |             |             |
|---|-------------|-------------|-------------|
| C | -1.98462400 | -0.88303000 | -1.87160100 |
| C | -3.16579500 | -1.43851500 | -2.35048800 |
| C | -3.83387900 | -2.40726100 | -1.60248700 |
| C | -3.29076100 | -2.83928300 | -0.39450300 |
| C | -2.10271200 | -2.27073200 | 0.06695700  |
| C | -1.44303800 | -1.26860800 | -0.63994400 |
| H | -1.48933000 | -0.11881500 | -2.47453400 |
| H | -3.59818800 | -1.12897200 | -3.30002200 |
| H | -3.78470700 | -3.60087400 | 0.20364900  |
| H | -1.70216800 | -2.61706300 | 1.02088200  |
| O | -5.01033000 | -2.86276500 | -2.12889600 |
| C | -5.74061300 | -3.78037400 | -1.36246300 |
| H | -6.00552400 | -3.36808800 | -0.37573500 |
| H | -6.65772600 | -3.99545700 | -1.91638800 |
| H | -5.19109500 | -4.72136000 | -1.20845400 |
| P | 2.37763900  | 0.65528800  | 0.68456700  |
| P | -1.43859100 | 1.35228500  | 1.05824900  |
| C | 2.65391200  | 1.98980300  | 1.96324600  |
| H | 2.96110900  | 1.51323600  | 2.90330300  |
| H | 3.49013900  | 2.62059300  | 1.64054400  |
| C | 0.37857300  | 2.06819100  | 3.07295900  |
| H | 0.52045800  | 2.39149300  | 4.11370700  |
| H | 0.59236400  | 0.98676000  | 3.06189100  |
| C | -1.06795200 | 2.27020400  | 2.65208300  |
| H | -1.75974500 | 1.90620400  | 3.42021700  |
| C | -3.05783700 | 0.58031400  | 1.44186800  |
| C | -4.11122200 | 0.58385300  | 0.52634400  |
| C | -3.18430300 | -0.17169800 | 2.61413800  |
| H | -4.01796700 | 1.13140600  | -0.40928900 |
| C | -5.27379400 | -0.13315800 | 0.78810300  |
| C | -4.35082500 | -0.87690100 | 2.88153100  |
| H | -2.35317900 | -0.22880900 | 3.31872300  |
| H | -6.07898800 | -0.13301700 | 0.05635400  |
| C | -5.40091300 | -0.85619800 | 1.96865000  |
| H | -4.43594200 | -1.45184000 | 3.80084900  |
| H | -6.31269500 | -1.41316000 | 2.17300600  |
| C | -1.86022000 | 2.71274800  | -0.09860400 |
| C | -1.12283000 | 2.83563800  | -1.27586200 |
| C | -2.85686600 | 3.65536700  | 0.17895900  |
| H | -0.34766500 | 2.10078000  | -1.48754200 |
| C | -1.36393800 | 3.88211400  | -2.16040200 |
| C | -3.10322300 | 4.69735900  | -0.70568800 |
| H | -3.45111500 | 3.56472400  | 1.08809900  |

|    |             |             |             |
|----|-------------|-------------|-------------|
| H  | -0.77435800 | 3.96739100  | -3.07048700 |
| C  | -2.35517800 | 4.81299400  | -1.87555100 |
| H  | -3.88167000 | 5.42348000  | -0.48320600 |
| H  | -2.54897200 | 5.63171800  | -2.56457900 |
| C  | 3.05663600  | 1.45925300  | -0.82359800 |
| C  | 2.30175800  | 1.44644100  | -1.99779300 |
| C  | 4.30724100  | 2.08695800  | -0.83497200 |
| H  | 1.34536800  | 0.92213400  | -1.99861300 |
| C  | 2.76771800  | 2.07017600  | -3.15130800 |
| C  | 4.77808800  | 2.70422200  | -1.98644600 |
| H  | 4.92931000  | 2.07844600  | 0.05977900  |
| H  | 2.16551700  | 2.05301300  | -4.05682600 |
| C  | 4.00474700  | 2.70292200  | -3.14478300 |
| H  | 5.75266800  | 3.18673700  | -1.98206500 |
| H  | 4.37317100  | 3.19015100  | -4.04450600 |
| C  | 3.64221300  | -0.58998000 | 1.13381000  |
| C  | 3.62498000  | -1.11705200 | 2.42893500  |
| C  | 4.50457700  | -1.14707500 | 0.18852800  |
| H  | 2.92677100  | -0.72388400 | 3.16939600  |
| C  | 4.47043000  | -2.16149800 | 2.77943900  |
| C  | 5.34370400  | -2.19921900 | 0.53761700  |
| H  | 4.50391700  | -0.77546900 | -0.83433500 |
| H  | 4.44908000  | -2.55866500 | 3.79170400  |
| C  | 5.33364300  | -2.70450900 | 1.83244600  |
| H  | 6.00043500  | -2.63248900 | -0.21303300 |
| H  | 5.99031000  | -3.52813200 | 2.10246300  |
| H  | -1.28885900 | 3.33533900  | 2.50172600  |
| Pd | 0.17366900  | -0.27611400 | 0.16142100  |
| C  | 2.28969900  | -4.01782900 | -0.22225400 |
| C  | 1.54213700  | -2.93201000 | 0.22655300  |
| C  | 1.16806100  | -1.90011300 | -0.64102700 |
| C  | 1.53653300  | -2.01176600 | -1.98382000 |
| C  | 2.28805000  | -3.09509600 | -2.43786500 |
| C  | 2.67297600  | -4.10051100 | -1.55756800 |
| H  | 2.57998300  | -4.79931000 | 0.47902200  |
| H  | 1.26449200  | -2.88395700 | 1.28113700  |
| H  | 1.23129400  | -1.24940400 | -2.70207400 |
| H  | 2.56563400  | -3.15500200 | -3.48948600 |
| H  | 3.25859100  | -4.94691100 | -1.91095900 |
| C  | 1.37915700  | 2.79736300  | 2.17122100  |
| H  | 0.92421000  | 3.01689600  | 1.19084300  |
| H  | 1.61736100  | 3.77894200  | 2.60223400  |

TS3<sup>Pd'</sup>

G(Gibbs Free Energy) = -2469.268543 hartree

E(electronic Energy) = -2469.8579447 hartree

|   |             |             |             |
|---|-------------|-------------|-------------|
| C | -1.73697100 | -1.13872400 | -1.96416900 |
| C | -2.98669500 | -1.58008800 | -2.37143900 |
| C | -3.73176800 | -2.42951100 | -1.55141800 |
| C | -3.20141400 | -2.84407400 | -0.33179800 |
| C | -1.94680500 | -2.38528100 | 0.06506500  |
| C | -1.19308600 | -1.51791900 | -0.72685200 |
| H | -1.17329200 | -0.48053000 | -2.62748800 |
| H | -3.41445200 | -1.27520000 | -3.32427000 |
| H | -3.75818500 | -3.50432000 | 0.32790200  |
| H | -1.55422200 | -2.71901800 | 1.02607400  |
| O | -4.96210500 | -2.78614800 | -2.02246600 |
| C | -5.74656900 | -3.61283500 | -1.20591100 |
| H | -5.95754100 | -3.14270700 | -0.23210700 |
| H | -6.68873300 | -3.77540800 | -1.73475800 |
| H | -5.26759600 | -4.58687000 | -1.02532400 |
| P | 2.38234100  | 0.66834400  | 0.72218000  |
| P | -1.44750300 | 1.39936700  | 1.03422500  |
| C | 2.64878800  | 1.95976100  | 2.04779100  |
| H | 2.91685600  | 1.45377000  | 2.98469100  |
| H | 3.50358300  | 2.58783100  | 1.77092600  |
| C | 0.33414700  | 2.05740500  | 3.09027900  |
| H | 0.45879600  | 2.35128700  | 4.14213400  |
| H | 0.52072900  | 0.97134400  | 3.05527300  |
| C | -1.09885200 | 2.30691200  | 2.63956700  |
| H | -1.81775100 | 1.96247900  | 3.39225200  |
| C | -3.07037100 | 0.61226300  | 1.36972700  |
| C | -4.08901200 | 0.59888700  | 0.41479300  |
| C | -3.23391100 | -0.14013600 | 2.53809000  |
| H | -3.96700200 | 1.14689900  | -0.51781200 |
| C | -5.25843400 | -0.11950900 | 0.64028800  |
| C | -4.40636000 | -0.84832600 | 2.76886000  |
| H | -2.42896900 | -0.18600400 | 3.27330300  |
| H | -6.03851500 | -0.12580200 | -0.11845900 |
| C | -5.42563500 | -0.83450800 | 1.82109300  |
| H | -4.52193600 | -1.41764400 | 3.68848000  |
| H | -6.34514400 | -1.38830800 | 1.99960300  |
| C | -1.87192300 | 2.76224500  | -0.12077300 |
| C | -1.15913100 | 2.85851300  | -1.31590700 |
| C | -2.85305600 | 3.71939600  | 0.16232600  |
| H | -0.39787800 | 2.10921800  | -1.53166900 |
| C | -1.40855000 | 3.89431400  | -2.21123100 |
| C | -3.10621100 | 4.75183700  | -0.73141200 |



|    |             |             |             |
|----|-------------|-------------|-------------|
| H  | -3.43033800 | 3.64675300  | 1.08406000  |
| H  | -0.83974000 | 3.95994600  | -3.13595100 |
| C  | -2.38192900 | 4.84149900  | -1.91848000 |
| H  | -3.87157700 | 5.49024200  | -0.50363700 |
| H  | -2.58065600 | 5.65251700  | -2.61527300 |
| C  | 3.15447100  | 1.48052400  | -0.73633800 |
| C  | 2.43717300  | 1.52515600  | -1.93299900 |
| C  | 4.43212200  | 2.04954700  | -0.69628100 |
| H  | 1.45541400  | 1.05089800  | -1.96995100 |
| C  | 2.96945800  | 2.14322600  | -3.06071200 |
| C  | 4.96777500  | 2.66392800  | -1.82071300 |
| H  | 5.02210400  | 1.99664100  | 0.21860500  |
| H  | 2.39692100  | 2.17148500  | -3.98500100 |
| C  | 4.23371900  | 2.71646700  | -3.00356500 |
| H  | 5.96248500  | 3.10148200  | -1.77683900 |
| H  | 4.65353300  | 3.20048800  | -3.88232900 |
| C  | 3.57808700  | -0.64501700 | 1.16923600  |
| C  | 3.51852300  | -1.19954400 | 2.45257800  |
| C  | 4.41488500  | -1.23438000 | 0.21996400  |
| H  | 2.83686900  | -0.78296800 | 3.19553700  |
| C  | 4.30560600  | -2.29271100 | 2.79014200  |
| C  | 5.19506300  | -2.33553000 | 0.55573500  |
| H  | 4.44548400  | -0.84331200 | -0.79540500 |
| H  | 4.25436800  | -2.70640600 | 3.79480800  |
| C  | 5.14974300  | -2.86221500 | 1.84099700  |
| H  | 5.83395300  | -2.78920300 | -0.19864500 |
| H  | 5.76204000  | -3.72232100 | 2.10160100  |
| H  | -1.28191800 | 3.37934600  | 2.48954500  |
| Pd | 0.18027800  | -0.22138600 | 0.16319000  |
| C  | 2.12763100  | -3.99666500 | -0.29866300 |
| C  | 1.23300200  | -3.01443900 | 0.11107100  |
| C  | 0.84205700  | -1.98121300 | -0.75385400 |
| C  | 1.37165800  | -1.98535900 | -2.05125400 |
| C  | 2.26410300  | -2.97034700 | -2.46281100 |
| C  | 2.64918900  | -3.98327300 | -1.58948400 |
| H  | 2.42463300  | -4.77619700 | 0.40147200  |
| H  | 0.83676200  | -3.04856300 | 1.12675400  |
| H  | 1.06944900  | -1.21743100 | -2.76409100 |
| H  | 2.65611000  | -2.94718600 | -3.47863400 |
| H  | 3.34461500  | -4.75524800 | -1.91163600 |
| C  | 1.37750900  | 2.78256400  | 2.23353600  |
| H  | 0.95719000  | 3.02551000  | 1.24311700  |
| H  | 1.61686600  | 3.75275200  | 2.68961100  |

**Pd<sup>0</sup>**

G(Gibbs Free Energy) -1892.0878 hartree

E(electronic Energy) =-1892.4824623 hartree

|   |             |             |             |
|---|-------------|-------------|-------------|
| P | 2.00562600  | -0.47137600 | 0.16120200  |
| P | -2.07614600 | -0.50385700 | 0.17816600  |
| C | 1.82816800  | -0.47619000 | 2.01681600  |
| H | 2.08044600  | -1.49764600 | 2.33541800  |
| H | 2.59835300  | 0.17511800  | 2.45380100  |
| C | -0.55982300 | -1.29139100 | 2.45285000  |
| H | -0.59903200 | -1.75401200 | 3.44993200  |
| H | -0.17057600 | -2.06235300 | 1.77068200  |
| C | -1.97770000 | -0.95321900 | 2.00210200  |
| H | -2.62973200 | -1.82427300 | 2.14391100  |
| C | -3.79595500 | -1.04326100 | -0.21640900 |
| C | -4.76118100 | -0.20072100 | -0.77239400 |
| C | -4.10259000 | -2.40102000 | -0.06441200 |
| H | -4.54013100 | 0.85464800  | -0.91935100 |
| C | -6.00894100 | -0.69768500 | -1.13825600 |
| C | -5.34991100 | -2.89504400 | -0.42029100 |
| H | -3.34703100 | -3.08520100 | 0.32437800  |
| H | -6.74978500 | -0.02572900 | -1.56611000 |
| C | -6.31045000 | -2.04188300 | -0.95723100 |
| H | -5.57101400 | -3.95169800 | -0.28706400 |
| H | -7.28671800 | -2.42733400 | -1.24138900 |
| C | -2.21678300 | 1.33379300  | 0.23254300  |
| C | -1.33588000 | 2.09429400  | -0.53941000 |
| C | -3.13466600 | 1.99687100  | 1.05589900  |
| H | -0.60940800 | 1.57858900  | -1.17024300 |
| C | -1.36022000 | 3.48495800  | -0.48486100 |
| C | -3.16584300 | 3.38486200  | 1.10632800  |
| H | -3.84151100 | 1.42289200  | 1.65510600  |
| H | -0.65392300 | 4.05749200  | -1.08237300 |
| C | -2.27478700 | 4.13091300  | 0.33831100  |
| H | -3.88499800 | 3.88741400  | 1.74940400  |
| H | -2.29548900 | 5.21746400  | 0.38498900  |
| C | 2.27205900  | 1.30807700  | -0.23041100 |
| C | 2.43356700  | 1.63824800  | -1.58218800 |
| C | 2.26149600  | 2.33938900  | 0.71091800  |
| H | 2.42092500  | 0.84275000  | -2.32793900 |
| C | 2.59343400  | 2.95815900  | -1.97981500 |
| C | 2.40989100  | 3.66609800  | 0.31204300  |
| H | 2.12723800  | 2.11973900  | 1.76835100  |
| H | 2.72352500  | 3.19393200  | -3.03355900 |
| C | 2.57930100  | 3.97882000  | -1.03078500 |

|    |             |             |             |
|----|-------------|-------------|-------------|
| H  | 2.39214500  | 4.45693000  | 1.05865000  |
| H  | 2.69725200  | 5.01472600  | -1.34033100 |
| C  | 3.70909100  | -1.15409000 | 0.00307900  |
| C  | 3.84980000  | -2.46812200 | -0.44644400 |
| C  | 4.85143500  | -0.42777700 | 0.35209900  |
| H  | 2.95858900  | -3.02610800 | -0.73511400 |
| C  | 5.10866000  | -3.05374300 | -0.53520900 |
| C  | 6.10968700  | -1.00950700 | 0.25660500  |
| H  | 4.75391700  | 0.60368100  | 0.69094200  |
| H  | 5.20724600  | -4.07809000 | -0.88720700 |
| C  | 6.23908200  | -2.32383600 | -0.18488800 |
| H  | 6.99398400  | -0.43605700 | 0.52588700  |
| H  | 7.22493600  | -2.77682800 | -0.26118700 |
| H  | -2.40603700 | -0.13737600 | 2.60097600  |
| Pd | -0.01904400 | -1.11657000 | -0.76012300 |
| C  | 0.41632700  | -0.10529000 | 2.48381300  |
| H  | 0.02942100  | 0.71953000  | 1.86712100  |
| H  | 0.46760600  | 0.29831200  | 3.50503300  |

## References

- S1. J. P. Perdew, K. Burke and M. Ernzerhof, *Phys. Rev. Lett.*, 1996, **77**, 3865-3868.
- S2. Y. Zhao and D. G. Truhlar, *Theor. Chem. Acc.*, 2007, **120**, 215-241.
- S3. (a) K. Fukui, *J. Phys. Chem.*, 1970, **74**, 4161-4163. (b) K. Fukui, The Path of Chemical Reactions-The IRC Approach. In *Frontier Orbitals And Reaction Paths: Selected Papers of Kenichi Fukui*; World Scientific: 1997; pp 471-476.
- S4. M. Mammen, E. I. Shakhnovich, J. M. Deutch and G. M. Whitesides, *J. Org. Chem.*, 1998, **63**, 3821-3830.
- S5. H. Ren, G.-F. Li, B. Zhu, X.-D. Lv, L.-S. Yao, X.-L. Wang, Z.-M. Su and W. Guan, *ACS Catal.*, 2019, **9**, 3858-3865.
- S6. Y. J. Dong, B. Zhu, Y. Geng, Z. W. Zhao, Z. M. Su and W. Guan, *CCS Chem.*, 2022, **4**, 1429-1440.
- S7. C. Y. Legault, CYLview and 1.0b, *Université de Sherbrooke*, 2009, (<http://www.cylview.org>).
